# Supplementary material for: Genome sequencing and transcript analysis of Hemileia vastatrix reveal expression dynamics of candidate effectors dependent on host compatibility
Source: PLoS One. 2019 Apr 18;14(4):e0215598. doi: 10.1371/journal.pone.0215598 (PMC6472787; doi:10.1371/journal.pone.0215598)
Supplement: S1 Table — a correspond to β-tubulin; b: cytochrome c oxidase subunit III; c: glyceraldehyde-3-phosphate dehydrogenase; EHv33: Hemileia vastatrix candidate effectors genes race XXXIII. (XLSX) [file pone.0215598.s004.xlsx]

## Sheet: Table S1
Table S1 Primers used for RT-PCR and qRT-PCR, with sequences designed using the Primer Express 2.0 software
Genes	Forward primer (5' to 3')	Reverse primer (5' to 3')	Amplicon size (bp)	Reference
β-tub a	CTGGTGCCGGAAATAATTGG	TCAAGAGAATCACAGCCCTCG	95	Vieira et al. (2011)
HvCyt III b	AGTAGATATGAGTCCCTGACC	CACCTTCAGCACTTACATCC	173	Vieira et al. (2011)
HvGADPH c	ACTTGGACAGCTACGAC	CCATACCAGTGAGCTTCC	280	Vieira et al. (2011)
EHv33-1	CCCTTTGGCTCAAATGAAAA	GTGGATTTAGCCAAGCAAGC	116	This study
EHv33-2	ATCCCTTGTCGCATCATCTC	ATGTGTAAGGCGGGCTAGAA	124	This study
EHv33-3	CCTCGGCTCATTTCATGACT	TGAGTCTGCAAGGAGGTACTGA	100	This study
EHv33-4	TGGTGCATCATTGATTTTGG	GACAGGATTCCAAACCAGGA	108	This study
EHv33-5	TCAAGGCCAAAACACTTTCTG	CAGCAAGGGAAAACTTCAGC	85	This study
EHv33-6	GCTGGTTTATGGGGCATATT	GAGAATTGGCCATTCGAAGA	119	This study
EHv33-7	TGTTGCACTATGTTGCTTTGG	TCCTCATTCTTTGGAAGATGG	93	This study
EHv33-8	GAAAATGCTGCCAAGGATGT	GCAACTTCTGGTCCCCATTA	121	This study
EHv33-9	TCAACGCACCCTTGGTATCT	GGCACACCCAATTTTTCAAG	102	This study
EHv33-10	TGCGGTTTCAGTCACTTTGG	AGGCTTCATCTTATCCGTCGT	70	This study
EHv33-11	TCCTGAGAGTTCAGTCGCAA	TGACGGGTTTGCTTGAACAG	98	This study
EHv33-12	ATTCCTGACTTCGACAGCGA	CCACCTGGAGGCATAATTGCTA	146	This study
EHv33-13	AGCCCAAATACGGCTGATGA	ATACACGGGATTTCCACGCA	96	This study
EHv33-14	CGGGCAGATATACGTGAAAG	GTCCCAGATGCTTCTTGATT	165	This study
EHv33-15	GATTATCTGGTTCCCCAGCA	CTACCTGGATTGGGCTTTCA	186	This study
EHv33-16	ACCTCAGGCTGTTGCAGAAT	AAATTCATGGTGCCACACAA	183	This study
EHv33-17	GCCTTTGGCGTAGAATGT	CTTCCGTCACCATCAGTATC	154	This study
a, β-tubulin.
b, cytochrome c oxidase subunit III.
c, glyceraldehyde-3-phosphate dehydrogenase.
(EHv33) Hemileia vastatrix candidate effectors genes race XXXIII
References
Vieira A, Talhinhas P, Loureiro A, Duplessis S, Fernandez D, Silva MC, Paulo OS, Azinheira HG. 2011. Validation of RT-qPCR reference genes for in planta expression studies in Hemileia vastatrix, the causal agent of coffee leaf rust. Fungal Biology 115: 891–901.
