# Supplementary material for: Genome sequencing and transcript analysis of Hemileia vastatrix reveal expression dynamics of candidate effectors dependent on host compatibility
Source: PLoS One. 2019 Apr 18;14(4):e0215598. doi: 10.1371/journal.pone.0215598 (PMC6472787; doi:10.1371/journal.pone.0215598)
Supplement: S3 Table — (XLSX) [file pone.0215598.s006.xlsx]

## Sheet: Table S3
Table S3 Putative Secreted Proteins (Singlets) Hemileia vastatrix race XXXIII
Protein(Singlets) ID	Proteins size (aa)	Contig	Access number (contig)	SignalP 4.0		Putative secreted proteins Hemileia vastatrix race XXXIII sequence
				Cleavage site	D-value
protein6	151	Contig111098	PHNK01109841	30	0.458	MKHLSTRKLLHSTMNAITFLLVLYYKSDSDLEDALAYMCFLSKKRYIITRGPNLYHDPRYDLASILNIPHLNFTQLFRTSPDSFFKLYQLISDHPIFHNNSHNKQRNPAIQLAVALCRFGSNGNGAAVRRLDNLFNIGYGTWLPWIMS
protein24	269	Contig6739	PHNK01006739	19	0.904	MILPLLFSIFLMVTLVISFEPDAASSKKLFSRQQRVARANPQDSVIGSIINDPPQTRIFEWVLTETPGALDGFQKPMLVVNGQYPGPTIEVNSNDRVIVRVVNRLRRASVIHWHGLHQRGTPHYDGAHGVTECGIPPGQSQVYDFRVDGFVGSTWWHAHHKGDYTDGINGPFIVHFPDEKIPKYDYDITMHLSDLYHSTATQILRIFLSPGGVPQAPGASPVPESGTINGFGQFNSSGRMVGEYYRLRVRSRKTSCTINLSFAP
protein42	207	Contig29301	PHNK01029277	30	0.367	MKHLSTRQLLHSTMNAFALLLVLYYKTDSDLEDSLAYMSFLSKKFDINPRRPNLHHDPRYDLHSILNIPQLNFTQLFQTSPDSFFKIYQLISKHPIFLKNSQNKQLDPAIQLAVALCCFGSNRNAYASGKYIIPAFCGSTLENDPKTAFNYHLAQSRVQIKHSIGILNGRFSSLQELRIKFQKKGNKNYKSLDNDLCFTPQYTS
protein68	72	Contig6935	PHNK01006935	25	0.371	MIPIKNSVIMPINLLLQNFALVQMQMVLLGCLGSFHDSSFFQKVRISQSPDSYFDKSQYLLADSEYASGK
protein119	209	Contig88325	PHNK01087550	22	0.404	FGNQYQLWGCLFSSSTLISLAKEAFSSAQIDLCPILNYDSTIFFNIPHVIFEGSFQISQSTQDWKADQLIRGIKTVLKTHQLQAINFMIDNERMLKEKLDIMAQTIFDLESQHRLCLTGTSLQNRPTDLQSLIFFLRIKKWQEDWLWKNFLFPGLQKGKANSIKSINHLMKVISLRRTKDAILSLPKKIQRGILVQLADPWRSKL
protein136	153	Contig976	PHNK01000977	22	0.880	MAVRIILLSFVVLSILSLFNAELLSDSAGLISSSTITWYTGEDLLRPFCADKSGWTPTDNSMIVAVTEQWGDRPKCGDFYQLIAPNQKSVTVRVVDLCGGCAPGVPHADLSKAAFTQLYGLDVGMMSGINMKKVAAPSNWNNELYGPKDL
protein138	149	Contig949	PHNK01000950	22	0.883	MKNTAALFVLITLSTILYSHAQLVITTESTGKQTTVVNNSSSGGNGNGEPESYGKKRISIKKYPDEDNGNWEPDSYEKKKSFIKEYPDEENGYGEPECLQITCGQLFIPLPPVPKVMNSLPSKSTMRLVQESFNSLVVFSFLTLLF
protein143	338	Contig86917	PHNK01086167	30	0.405	MKHLSTRKLLHSTINYITFLLVLYYKSDSDLEDSLVYMCFISKKFYIITRGPNLYHDPQYDLASILNIPHLNFTQLFRTSPNSFFKLYQLISNHPIFHNNSHNKQHNPTIQLAVALCLFGSNGNGAAVRRLDNLFIIGYGMVILYTKRCMIAILSLKYSIVIQLVCNVNKKFIAFHSGCPGSCQDSSFFQRMRISQTPDSYFDKSQYLLSDSAYASGKYIIPDFCGASIESDPKTAFNYHLAQLRKQFASLQELRIKFQKKLEIKTANHWIMTCIILHNILDDLKDDWNDLYEEEDPEPPPALPSLESQNIQSTGICSIIMPITLQYFTSQHF
protein255	238	Contig18290	PHNK01018287	18	0.875	MRSSFLVLAALVLAVYAQNGPTINTPTSVVECLPVSISFGGGSGPYYISAIPGGQASAAPLKDFGQQATSPFTWKVDLPAGTSITMQPAPSGACSSSSSSSSSSGAGAPGPATGVTTASSSAPTPVSSGSKTPANNSSQAESANNSSSTSSGSKNATSATNTTTTANTTTGTNTTQSSTPKTGTSSTPSTSSNGASSIKPTNATTGAEASGAMSLLASSGVVSCVVAAVMAVVA
protein260	133	Contig30612	PHNK01030585	22	0.370	MNYTQMIHALIYLLHIRTELCNVKQTTGIIKSLKCGAAFLDRYRRLRSSVAAQEVEYNLGRFFHGYGLYTLAIRHYENVLKLKSNNAHHDGVDEEPSDVSSIAAYNLILIYTTLGSADLAHQIALKYLAV
protein266	116	Contig22578	PHNK01022571	32	0.572	MLLLKLLNLVFSTNILLKHLSIITRSNGILGAEHKFYIYNFQEELASLPTSPTAFLTGPNVTISTDDIKKFENAVGNCSDAYHKNGLAATKVGDIFTSEARILSIINTETGKTVV
protein295	53	Contig108606	PHNK01107386	17	0.563	MKISIFFQILLMRMESMYFLLFREQLQKTVKIPSSTIIWQSQESVLNILLES
protein311	199	Contig6091	PHNK01006091	25	0.484	MLSISNVARFVCAAVISSAVFVEGQATDAQLALVQANYDALQLSASYPDGFGIPLKAKALLNVEYPTGPIQLGNAYSASDVSKIPIISVTASATTSSSFTSSSSFTLILADANALGNPDPQFNGAKFGDPTPNATSTLNPGSGTVVLLFEQSSSFHAPSNLSASGTAPGHWYLNAYVSESGLGDLIAASFFTVHF
protein319	617	Contig17145	PHNK01017142	28	0.901	MIRLSGLARHSALRFLWLAIFLPFSLAIDPPLHPQAQQPSLVLPHPISSPFYRRSSHSLHKREYPSESWAVQEKEKLLLKYSHKSNSRLKARDIVELPPSFTSPIEHQIGIPNVSSIPPDLNSTNNNSIASTSRSPSPLINSTMIRGVSDGMGGVIGLERVVNFQADLEYFIPLRIGTPPQELNVIIDTGSSDLWIASSNCNTSTGCSTSMGPKFNPLNSSTNLDLKKSFNIKYGSGSASGRMMSDNITIAGYDVVAQSFAVVDTISSELLSKDVSGLLDFLICPTFYAGLGFQPLASSGVTPIWQSVVSNMSAYNASFPGFSFAFTRFVNVTNATEVSPGGIFTLGTLNASLFTGPINFIPVPVNLESYWLIPMEGLTVNGTQVGLANEKTPNVAIDT…
protein531	199	Contig102506	PHNK01101432	24	0.502	MKIFAYGTLYLPLTLFLLFDSKSSVIKHLKKIMNLQTKVGIPNWCDSKWEDISHEYLLFSNVIITHSGFHNRIHINRNDANFLTFGIFSYINPITGHPIPSPAKIKGHGLYFPDHRCIIDFGLGNGIIKTIWNSSKDNHQTTKAPPGLESCQDLTHFGCSFQISHKLIQRINKVKKEGKVIRFKKTLSRSKKYGD
protein534	196	Contig1912	PHNK01001912	19	0.871	MNSVILLFNLLLHYVALAQMEMVLLGFPGSCNDSLVFQRMRISQTPDSYFDESQYLLADSAYASGNYIIPAFCGATIESDPKNTFNYHLSQSRVQIKHFILILKGRFSSLQELRIQFHKELEIKTVNHWIMTCFILHNILADLKDYGNDLYEEEDPEPEPALPSLESQNIHSTRICSVIMPITLQHFSSPPF
protein545	209	Contig106350	PHNK01105182	22	0.404	FGNQYQLWGCLFSSSTLISLAKEAFSSAQIDLCPILNYDSTIFFNIPHVIFEGSFQISQSTQDWKADQLIRGIKTVLKTHQLQAINFMIDNERMLKEKLDIMAQTIFDLESQHRLCLTGTPLQNRPTDLQSLIFFLRIEKWQEDWLWKNFLFPGLQKGKANSIKSINHLMKVISLRRTKDAILSLPKKIQRGISVQLADPWRSKL
protein590	649	Contig108953	PHNK01107726	19	0.421	MKLLLEWMVLPTWTLVKQIIFFIGDRSVEKEIVAMSGYKKRDWKLLCREMVDRWGVRFTMVDLNKVFSEWQSYGGVEYLVEVEELAHENSAKDVFWSALARDVRMDVLKELSRKELMKTLSNGDQKLPALDKVKEAVEAHLKLLAVDTYQEGCAKYVSKVSEALAEEEVRVKKEEKNLVQVPKQERDPMVEQLADLTKQLHIFFRRLRRSIRHLLSLEILIGGLEGHRSNDCWALNRDVSEGKVEFDGRVFKFPDGSFVKPSEGQAPVDLVRRRGGLNQRRPRFEEIPDQGKSSGKEDEDGKGKGKEVNKVSFSTSFGGLELYSCGGQSSGECLAGVYDVEAGKVGRPKSSSQTQPKPNASKVDPKLSAARKRYSKEELYKMQKGMADMGPPSFGALDM…
protein612	139	Contig13650	PHNK01013649	18	0.660	MPSFLFLLSRFFLRVDGVVFRLFDVRVFVEFSDRPVVIRQTKGREMPYEEVKKKLPNENGCDLTPLTDPNWVAQALKMLDNENDQTLLETSEVQTASPMEEKWSQGWTTIEKAELMVNDDCDKGNEFSDRKFDHTNK
protein613	230	Contig81439	PHNK01080788	22	0.398	FGNQYQLWGCLFSSSTLISLAKEAFSSAQINLCPILNYDSTIFFNIPHVIFEVSFQISQSTQDWKADQLIRGIKTRAQTIFDLESQHRLFLTGTPLQNRPTDLQSLIFFLRIKKWQEDWLWKNFLFPGLQKGKIQRGISVQLADPWSSKLDVLQEGFTEQYGLSRSTDLPWDSSEFLRELMILRKFCNHLIYENLDETTTFDFTWKHSAKICHLICHLKNFLSGER
protein615	150	Contig92952	PHNK01092079	30	0.445	MKHLSTRNLLHSTMNAITFLLVLYYKSDSDLEDALAYMCFLSKKRYIITRGPNLYHDPRYDLASILNIPHLNFTQLFRTSPDSFFKLYQLISDHPIFHNNSHNKQRNPAIQLAVALCRFGSNGNGAAVRRLDNLFNIGYGTWLPWIMS
protein620	143	Contig59277	PHNK01059048	18	0.590	MKLLLVWIASYLGMVKQTIFFIGDREVEKEVVAISGYKKRDWNFLCREIVDRWGVRITMVDLNKVVSEWQSYGGVGNLHSYRNFLLQFDPVVEYLVEVEELAHENAAKDVFWSALDRDFRMDMLKELSRKDLMKTFSNGD
protein630	309	Contig45504	PHNK01045426	22	0.418	MPNLPQQRYNALLFHLKLLWGLFKQDSVPRALEPQDINQFYQHFSSVAQVELVIKNYFSPPLIPIEDFQFMKEAWCSQIKIGKSLILLINNFIHYTQGFLSCLVLRMWRPNLEESSSSLYNTSCHIAALTTFQEITGRKAYFFSISTCHVLRFKKEVMERGKNQKDAYRKKIQKNREHLRDARVEYACHNKFPKRLIQVLDDVCAHSDDEFNKDKGFYDIKTLSIDQSIVHLDAQMLQEAEQDLEIFHRVCRFPKNPIKSKFRKAPRKLPLNFYYPSWFKAKTSSPSKQESNPQMLTTWMVST
protein647	137	Contig29901	PHNK01029875	30	0.468	MKHLSTRKLLHSTMNAITFLLVLYYKSDSDLEDALAYMCFLSKKCYIITRGPNLYHDPQYDLASILNIPHLNFTQLFRTSPDSFFKLYQLISNHPIFHNNSHNKQRNPAIQLAVALCRFGSNGNSAAWLPWLMS
protein683	104	Contig39448	PHNK01039397	29	0.523	MILPFNLLSHYIALVQIEMVLLCYPISCHDSSVFQIMRISQSPESYFDNSQYLLADSEYASGKFIIPALHCATLENAPKNTFNYQISQSRVLIEHAIGILQG
protein686	156	Contig94290	PHNK01093389	21	0.565	GNPAFQLSVALCCFVSNVNGASVRGLDNLFTIGYGTVILYTKRCMIAILSLQSQTLAWSAPQQQLESSQVMQEEVFPRCVDYVDGTTIPLTQNSAHDGNHYFDCKKRYSIVFQLVFDVNKNFIAFNSVYPCTFHESSVFQRMKISQNTDKYFD
protein688	115	Contig98769	PHNK01097760	20	0.648	MSVILAFNLMWHYFSLVQMEMVLLGCPGSCHDSSVFQRMRISQSPDSYFDKSHYPLEDSEYTSGNGSTLENDPKNTFNNHLSQSRVQIEHAIGILKGKFSSLWELRIQCQKKL
protein693	135	Contig73222	PHNK01072720	15	0.588	MMIFLLLMSQVTFGGFYNKIHMDKNNLNSLTFGIFSYINPKTGLPIPSPSSSTKGHGLYFPDHQCIIDFGTGNGIIAAIWYLNLHNHQTTKAPPGLESCEEFTHFGCSFQINRELVNRINKVREKGEVKQKH
protein722	248	Contig108417	PHNK01107203	30	0.504	MKHLSTRQLLHSTINAITLLLVLYYKSDSDLEDALAYMCFLSKKRYIITRGPNLYHDPRYDLASILNIPHLNFTNFLELLPILSSNFINSSPIILSFIKIPITNSVILPSNLLLHYVALAQMETVLLGCPGSCHDSSVFQRMRISQTPDSYFDESQYLLADSAYASGKYIIPAFRGATLENDPKTKFNYHLAQSRVQIEHAIGILKGQFSSLSGAQNPISKKIGDQNCKSLDHDLHYTPQYPS
protein744	223	Contig27305	PHNK01027287	22	0.572	MAIHTITCAALALQLPQVIQATASTYIHRFYMRRSIQDYPINEMSATALFLATKVEEVPRKLEYVVKEFLKLCSADHPSISSSYLLESSITTFKQRVLYYEEVLLRTLCFDLAIDHPYVPLIRNTRNFSGRAKALAQTAWGFVNDSFITPLCLITSPEVIAAAAFYMAFSYFGMTLPDYDANPQSLSVTQEDSASTETPLQNLSWWKHFGVSDLDKIYG
protein746	444	Contig1703	PHNK01001703	28	0.739	MAHLRRNQSRNLLSGLISLLKIWGCAAFEKATAIYDTWPELFGANETLSLPGFSLGITKSTKYPLNYLGFLIKALTLRLDLLLNDEHNRIEDLRDTLEILKSASKSFYSASFIFPTGGARQRLIIIYGWCRATDDLIDNSQSAMEAQTMANMFVDYLNMLWANKSIDPDAKMDQLSKETSPLLSGFKDSEIHLFIQTRVPPQAQAAFRLLSTLRSQISREPFDELVAGYQYDAKKIGFSHIQSENELIQYSRWVAGSVGEMCVSVFWSVEQPSISKQERQTILKAANDMGVALQLINIARDIREDAQIGRIYLPATWFSDSKTDSLTIHDRDCLLNGKLDEFPYSQAAQRVLTLAHAYHQLSEAAINRLPKPYRAGVKAATSVYFEIALNISKVIEQTK…
protein761	303	Contig11254	PHNK01011253	25	0.660	MICSKYYTKCLIILSLGTLACCFGDCNAPTCFLTKTNNTLDYQLVYNDIAAALPCRNYDDGSYAPVIVRLAWHASGTYDKTTGTGGSNGATMRFSPEKNYPANSGLENARDRLEPIYQKYASWGLSYSDLWTLGGVCAIQELGGPSIPWRAGRIDGQPRDATPDGRLPNPRLEQNHLRNIFNRMGFGDQFLFQVVTLSEDVTENDQLSLTWTYGTGFEGPWTFTPVNFTNAYYKLLYEEHWQLRKWNGLPQYEDARTRSLMMLNTDMSLVRDNAFKYWVEKLEKKFIFIDTNEKDSLLI
protein856	215	Contig29379	PHNK01029355	14	0.482	MAAFGYWAGFVGAEVGILAAAAQVCDNKNLGPLKACKGGKEVLVKEVADSIIYHCIVNSDNILQWGISETAKGGPFQEILDVDIFVNCIYLTKKIPYFITPETIQAARKERQLSVVVNFSCDTKNPNNPLHIYSAKTTFDLPTVLLSAPAVVPPLHIVSIDHLPTLLPREASEVFSCNLLPSLLQLKDWHPSRVCADAKKLYNEVASKLVN
protein915	193	Contig23378	PHNK01023370	18	0.715	MNSLVFISLFAVPLLAGFFPSDGDVKSADVAALQKHLRKSSKATLTAFYAPWCGHCKRLQPEFERAASNIKNLVNLGYPTIKYFAGNPHPIDYQGERVAKAMVEFSLKNMPNYARKFKSKDEMISFIQKASPTKPLVVLFTTAKLTTPMYKALSGAFHKRATMYTAHESALVYLRYINDLMGQSKKDTC
protein916	79	Contig23378	PHNK01023370	19	0.453	MSSPFFLSFHINLHIVGAETASEYDVSVPGLVIFTSPKKVKKYQGKMNYSGIHSFIKETILSAEKETEAPGRATGEL
protein979	151	Contig117934	PHNK01116530	30	0.548	MKHLSTRRLLHSTINAITLLLVLYYKSDSDLEDALAYMCFLSKKRYIITRGPNLYHDPRYDLASILNIPHLNFTQLFRTSPDSFFKLYQLISDHPIFHNNSHNKQRNPAIQLAVALCRFGSNGNGAAVRRLDNLFNIGYGTWLPWIMS
protein1029	165	Contig116932	PHNK01115542	22	0.399	FGNQYQLWGCLFSSSTLISLAKEAFSSAQINLCPILNYDSTIFFNIPHVIFEGSFQISQSTQDWKADQLIRGIKTVLKTHQLQAINFMIDNEKMLKEKLDIMAQTIFDLESQHRLCLTGTPLQNRPTDLQSLRFFLRIQKWQEDWLWKNFLFPGLQKGKANS
protein1072	108	Contig83464	PHNK01082774	22	0.703	MFKALYYSFLLLSFLFEKIEGQKLQVSIRSADDFCMVVPKDVNTNIGDSEYPGGMIVSCQKPGRNGQATFSGNFWTSVKYAKPKPGVVQSLMENLIISKNVKSKSE
protein1120	477	Contig5248	PHNK01052382	24	0.694	MRLIVLICNFLLFSNLESNLAQAASYSPSLQVDDIQQLQTAANAALKNLWGFYTPDPVEIPWHESGMIYQAYFDYAAWTGDTSFLPHITAALVNASYHHEQDLLGGSLVSAVELFMGRWNDDILWYSQASKRVSQELEVCSYIYLRYFLNQLRQVLLFMGLTRQCQEQMALGLLLLKKLMTKYIHNGMKSAEVVSTGYGDKAAYKSLITQLEFINQGARNYLLEKNETSLQLAKDAVNWVVSSGLANLKEGWLFDGLHTTNCANFTQFQWTYNYGEWIGSLAWMHRATSNDTYLQMAQPFYDFSIDLFANATTGGVIVERCEVAKVKCKRDPPGFKAIYVQNLAYLYREAKNETLKQSIKKVITVSLKSMLDKSCDKDYNCGGNWTLDTEPVKNLRGQH…
protein1132	273	Contig118063	PHNK01116658	31	0.362	MPSSLSNRDKLHQVMTVIALDLLLYSDCESDSDFKKDFIFLSKMNTKRYLLTRKPQVLHTPKYTIQILLNLSAPSFRQLFRTSQEFFLKLLHLIKDHPIFRNNSQKPQHDPSIQLAITLCCLSSNEPEFFFDEDQYLLDDSAYVNGKYVLPAFCGAASEDSQNAKFNNHLAKSRVHIEHSIGILKCHFSSLRELRSPPRNSSEMKAVINWILCCTILHNLLADLKDQWLELYEDEEVETPPTISNTTTSQTTSIRAKILPITLAHWEY
protein1137	374	Contig109431	PHNK01108196	16	0.527	MCSSPLISLLSPSLAQSLALSLISAARESDIRALHLILQHPELPSPSLQDDDGWTALHHAAEVGSLDAVTTLLQAGALCTITDQLGQTPGDVAFSLNYVDIYQSMLDEGFRAELLRLAIGATNPSSTPTGLPESDNDTFLNSKISYSVSSTGQPLCMDDHGNAVMLGWEHHIMSKTAQALFGRHNPSTHSTLSALNVGFGLGLVDTEFQKFHPAHHVIIEAHPDVLRYMKQQGWYNKPGVEIFEGRWQDYLQSLESNPAKTTEFDIIYWDTFSEDYSSFKTWLNALFGLLRSPESCFSWFHGFGATSRLIYDLYTLITEMDLRDAGFKAKWFEVAVPDGGEAVWEGVKRRYWDIPCPYRLPVAMMDV
protein1174	434	Contig2836	PHNK01002836	60	0.491	MLICSLPLVCQLSLFHLKTPITIKSTYDSNVDSLPVFSMYIFRLQQMAQFFFLWQITISSSLSQSEFTEILLQPLIKLYACPDRAVDSPFWSSCLSMLTNWKNLQKIWPNLVTGFTDTVPVILYSVLLIVPKLSECLLNNDLICHLEKTQVNTDPEIRTNTCILLDHLSKSLTPSTCHKVLIPAFTCSLRDSFPPARMAGLMALIAKVEYYEPEDLAGKVIPGMGICLVDKEKLAFKALDMFVECVRKAASEMPETAINPLPSGALNKSSLASKTSAPGLAICAAGAAGALASWAFSSVSRKLTSRLESSSSSLSITTTLGSSTPQVLTSQTESSPLTEKIPPSLQMAAKETISSWGGNLMDVEADADDWSTFETGPPVSDPSFIPLPSTIKLHLQSAE…
protein1211	163	Contig3254	PHNK01003254	22	0.398	FGNQYQLWGCLFSSSTLISLAKEAFSSAQINLCPILNYDSTIFFNILHVIFEVSFQISQSTQDWKADQLIRGIKTVLKTHQLQAINFMIDNEKMLKEKLDIMAQTIFDLESQHRLFLTGTPLQNRPTDLQSLIFFLRIKKWQEDWLWKNFLFPGLQKGKV
protein1241	465	Contig2974	PHNK01002974	22	0.548	MISFLLSAALSFSIPVLMRFAHNIIHQLFFYDASSPPVVFHFLPIIGSTIQYGIDPYAFFNSCRKKYGNVFTFVLLNKKVTVALGPEGNSVILNGKLSQVNAEEAYTHLTTPVFGSDVIYDVPNDVLMQQKRFVKSGLTTNNMRTYVGIIVKETLLHIEQDLFKTSSCQVMTKDAFDMASEITICTASATLQGKEVRAGLDKSFAKLYHDLDEGFTPLNFVFPNLPLPSYRRRDRAQVAMRNFYLKIMRQRREEGRQGTQADMLDALQNQVYKDGRPLSDKEIAHLMIALLMAGQHTSAATTSWFLLHLAEQPDLIKSLRDEQHKYFGQSDGSLDPLDYERLQTPLMMACIKEVLRLHPPIHSIMRKLKTSPILFHQTITFCRVQASLKLMTLYGMTLF…
protein1264	171	Contig17452	PHNK01017449	23	0.422	MSNHSIILFAFVSAVYFPFSSKEHAFILHLSGANERYTTAFGARLNVRGALHQNTGIMKESEIKAKNLTPCGRIFGGDDFPGFAIDVEKEFERSEKIGLPTSTPKDEIHMGIFVRNQDGAGPYKCYYSPDLTLQIFQPMKIVRQIEGVKGINHKAKDFVYPLTAYFYP
protein1265	122	Contig21095	PHNK01021091	25	0.491	NQNHPAFQIAVALCLFSSKGNCAAVRCLDNLFTIGYGTVILYTKCCMICYPFSQVSNTFLDKSTSATEILSCNFIAFHSGYPGSCHDFSVFQRMKISQNLDQYFDKYHYLLAYSAYASGK
protein1305	85	Contig243	PHNK01000244	18	0.496	MILPFNLLLHYVALVQMEMVLLRSDNLFTIGYGTILYTKHCMIAILYLKAKTLSGPTPQQQLESSQVIQAEVFPCCVGFVDGT
protein1319	252	Contig110532	PHNK01109285	30	0.464	MKHLSTRKLLHSTMNAITFLLVLYYNSDSDLEDALAYMCFLSKKCYIITRGPNLYHDPQYDLASILNIPHLNFIQLFRTSPNSFFKLYQLISDHPIFHKNSHNKQCNPAIQLAVALCCFGSNGNSASVRRLDNLFNIGYGTNEEFLKPLTHTLTNLSTSLQTQHMQVGSTLYLLSVVQPSKMTPKLNLIITLPNPRVRIEHAIGILKGQFSSLRELRIQFQKKLEIKTANHWIMTCIILHNILADL
protein1429	240	Contig90881	PHNK01090051	22	0.428	FGNLYQLWGCLFSSSTLISLAKEAFSSAQIDLCLILNYDSTIFFDIPHLIFEGSFQISQNWKADQIIQGIKTVLKAHQLQVINFMIDNEQMLKEKLDIIPTDLQSLIFFLKIEKWQEDWLWKNFLFPGLQKGKANSIKSINHLMKVISLRRTKDSILSLPKIIQRGILVQLADPWRSKLDVLQEGFTKRYGPSRSTEIPWDSSEFLRELIILRKFCNHPIYENMDETPTFDFTWQN
protein1454	41	Contig110733	PHNK01109482	24	0.527	MMPITLLMEFSHILILSLDNLFCHLLKLKDMDYIFLIIDV
protein1456	138	Contig14319	PHNK01014318	26	0.473	MKIFAYGTLYPTLILFLLFDSKKLCNKAFEKNHDLATKVGIPNWCDSEWEDISHEYLLFSNVIITHSGFHNRIHIDRNDANFLTFGIFSYINPITGHPIPSPAKIKGHGLYFPDHRCIIDFWFGKWYHRNYLEFF
protein1488	247	Contig110532	PHNK01109285	30	0.464	MKHLSTRKLLHSTMNAITFLLVLYYNSDSDLEDALAYMCFLSKKCYIITRGPNLYHDPQYDLASILNIPHLNFIQLFRTSPNSFFKLYQLISDHPIFHKNSHNKQCNPAIQLAVALCCFGSNGNSASVRRLDNLFNIGYGISQTPDSYFDKSQYLLADSAYASGKYIIPAFRGSTFKNDPKTKFNYHLAQSRVRIEHAIGILKGQFSSLRELRIQFQKKLEIKTANHWIMTCIILHNILADL
protein1503	117	Contig66528	PHNK01066157	18	0.686	MIMILNLLLHYVSLAQMEMMLLSCHDSSVFHRMRTSQNPDSYFDKSQYLLSDSEYASGKYIIPALHGTTIENDPKTTFNYNLAQSRVLIENSFGILKGRFSSLRNSESTFKKNGN
protein1514	170	Contig107479	PHNK01106287	24	0.394	MKIFAYGTLYLPLTLFLLFDSKSTVIKHLKKIMNLQPKLEYQIGVTPEWEDISHEYLLFSNVIITHSGFHNKIHTDTKDTNFLTFDHRCIIDFGLGNGIIETIWNSSKDNHQTTKAPPGLESCQDLTHFGCSFQISHKLIQRINKVMKEGKVNRFKKTLFRSKKYGD
protein1531	105	Contig96534	PHNK01095586	19	0.552	MNDITMVLICVFFRLMKGFAGYRDDSLETVKRNSTQYSLPLKVLSYDELYQGWTMDRVVDNIGKKGNCTFCGVFRRQALDRGADILGVDHIVTGHNADDIAET
protein1543	400	Contig19346	PHNK01019342	16	0.376	AVNALLNQVASALLAADVNVSLVAQLKSNTTALFNSPQFIQLKHSPQRQKLFIQNALFDQLVRLVDPNHSTPTNNPPPHSWVPKKAFPNVIMLVGLQGSGKTTTCTKLAVYYQRKGYKPALVCADTFRAGAFDQLKQNASRARIPFFGSSVEFFFHRIIIFHFPHPLHLRYSETDPVAISTAGVAKFKQERFDLIIVDTSGRHRQETELFEEMKQISNAVQPTMTFMVLDAAIGQAAESQSRAFKAAANFGAIIITKLDGHAKGGGAISAYAXLFLIITITTSKKSNRVAATKTPIFFIGTGEHLNDFQRFNPKPFISQLLGMGNLEGFLEQIQDIQESEPVLKREKLLEKIDRGEYTLRDFRDQIIQFSSISSSSSSSDGLLSSRLRVFLTT
protein1625	151	Contig20638	PHNK01020634	30	0.468	MKHLSTRKLLHSTMNAITFLLVLYYKSDSDLEDALAYMCFLSKKCYIITRGPNLYHDPQYDLASILNIPHLNFTQLFRTSPDSFFKLYQLISDHPIFHNNSHNKQRNPAIQLAVALCRFGSNGNGAAVRRLDNLFNIGYGTWLPWLMS
protein1654	114	Contig26818	PHNK01026801	20	0.818	MTPIILLFGIFLYINWITGQPILSPSKIKGHGLNFPYHQCMIDFGLGNGVIKTICNSSQDHHQMTRAPTGWESFQEFTHFGCSFQITQKLIRQINKVKKEGKLNKYKKTLCR
protein1658	115	Contig2800	PHNK01002800	16	0.688	MILLFNLLFHYVALSQMEMVLLMRISQSPDSYFDESQYLLVESAYASGKYIIPAFNGANLENDPQNTFNCHFAQSRVHIEYAIGILKERFSSLQDLRIQLQKNWRSKLQIIGS
protein1675	260	Contig102506	PHNK01101432	30	0.468	MKHLSTRKLLHSTMNAITFLLVLYYKSDSDLEDALAYMCFLSKKCYIITRGPNLYHDPQYDLASILNIPHLNFTQLFRTSPDSFFKLYQLISEHPIFHNNSHNKQRNPAIQLAVALCCFGSNGNGAAVRRLDNLFNIGYGTNLSTSLQTQHMQVESTLYLLSVVQTSENDPKTAFNYHLAQSRVQIEHAIGILKGRFSSLWELRIQFQKKLEIKTANHWILTCVILHNILADLKDEWNDLYEEEDPEPPPGTPLP
protein1684	197	Contig412	PHNK01000413	18	0.908	MILILINLLSFFRLVFADTASLRSKLSDANVDVAFPGDDRYLNFAKPFNRRFEKIAPAALVFPTNTSEVSKCVVIAVQEGLHGGVSGALVIDLGRLKMVKLDSSKVATIGSGNRLGDVALALNRQGVAIPHGVCPYVGLGGHSAFGGFGLASRLWGLTLDNILWHEVVLSNGTITYASATFNSDLFWVGDNCL
protein1698	68	Contig18640	PHNK01018637	37	0.455	MSAKSLFLVQIRLVTCPTSHLLKTSIFILIIKTANQKFSEIYNSFEKNLPSGSNPIMWLQTAKEEY
protein1746	151	Contig768	PHNK01000769	30	0.547	MKHLSTRRLLHSTINAITLLLVLYYKSDSDLEDALAYMCLLSKKRYIITRGPNLYHDPQYDLASILNIPHLNFTQLFRTSPDSFFKLYQLISENPIFHNNSHNKQRNPAIQLAVALCQLWLKWKWCCVRRLDNLFNIGYGTWLPWIMS
protein1767	92	Contig109222	PHNK01107990	22	0.913	MASLQFLLILGVLFISTLCSAHFTQSYPPPRALDIEKEDKFCGGYPVNATGRHPFPLSGSAPVIIDSHHKGAQIAVLLEHQTRPIVICRF
protein1802	228	Contig15160	PHNK01015158	18	0.437	MLLSLTFIIAGVDEPLAVQIESTASLIDLTALLEQKVGGVTRIPANRQLIFYRGVRLTNVQASLSSSNILQDEILELQEAPLSSQPVAGGNIANDTDRMRLQLLGNPSLMAQLRASNPELATAAESSPAQFAQLMSQLQRHQSQLALQRRHDEELLHSDPFDIEAQKRIEEHIRQELVWENMQHAIEFSPESFGRVTMLYVDVEVNGVPVKAFVDSGAQMTISK
protein1847	318	Contig636	PHNK01000637	18	0.397	MKVAVLGAAGGIGQALALLLKTQLPSGSELSLYDIAPVTPGVAVDLSHIPTAVKIKGFSGEDATPALEGADVVLISAGVARKPGMDRSDLFNVNAGIVKNLVQQVAKTCPKACIGIITNPVNTTVAIAAEVLKKAGVYDKNKLFGVTTLDIIRSNTFVAELKGKQPGEVEVPVIGGHSGVTILPLLSQVPGVSFTEQEVADLTKRIQNAGTEVVEAKAGGGSATLSMGQAAARFGLSLVRALQGEQGVVECAYVEGDGQYARFFSQPLLLGKNGVEERKSIGTLSAFEQNALEGMLDTLKKDIALGEEFVNK
protein1896	199	Contig53709	PHNK01053577	24	0.506	MKIFAYGTLYLPLTLFLLFDSKSTVIKHLKKNHELATKVGIPNWCDSEWEDISHEYLLFSNVIITHSGFHNKIHTDTKDTNFLTFGIFSYIKPITGQPIPSPAKIKQHGLYFPDHRCIIDFCLGNGIIKTIWNSSKDNHQTTKAPPGLESCQDLTHFGCSFQISHKLIQRINKVMKEGKVNRFKKTLFRSKKYGD
protein1898	69	Contig108374	PHNK01107161	20	0.563	MEAVINWILCCTILHNLLADLKDQWLELYEDEQVDSPPTISNTSISQSTSIRAKILPITLQHFSTQF
protein1967	175	Contig64471	PHNK01064143	24	0.476	MLTKKLYHSFLAILAHVMTPTSSKEYKFQMNLKNSLMKISIFLQILLIKNVLPAFWGAASEDSQNARFNNHLAKSRARIEHSIGILKGHFSSLRELRSPLRNKFEIEAVINWILFCTILHNLLADLKDQWLELYEDEQVDSPPTISNTSISQSTSIREKILPITLQHFSTQF
protein1997	151	Contig108810	PHNK01107587	30	0.432	MKHLSTRKLLHSTMNAITFLLALYYKSDSDLEDALAYMCFLSKKRYIITRGPNLYHDPRYDLASILNIPHLNFTQLFRTSPNSFFKLYQLISEHPIFHNNSHNKQRNPAIQLAVALCRFGSNGNGAAVRHLDNLFNIGYGTWLPWIMS
protein2003	64	Contig109944	PHNK01108704	20	0.507	MRLLLVWIFLLTWTWQSRLFSSLVIGQWRRRLWPCMATRRGTGIYCVGRWWIDWVSGYLWWI
protein2032	381	Contig15714	PHNK01015712	22	0.786	MLPSPFAKFIFSLTLLIPLLALRYNPEVVEYNINISPTTSNDVLQYNSSWPAKQNAGYTRSPSNWRALPTYTILLDKFIDGDPKNNDFFKTQFEWDLSANREFVDLLLEISQLIIFSELRHGGDITGFVQDRLTKLIFYHSGMGYRTIYIAGTPWINMPWQADGYSALDFTLLDPHYGTLNEWRAAIDKIHARGMYVMLDLTVTTMGDLIGVSKFLNSSAPFDIRGYEVEWKKPPYVPWNLSEYQDFTISNQFNTTCQFPAFYQEDASQVPSPGSGCYEGDFDQFGDVEAFGVHPDWQRQLSKFASVQDRLKEWDSKVAQKLEKLACMTIQALDPDAIRIDKATQQTVDFVGKWGQATKQCAKGLGKNNFFIPGEM
protein2035	433	Contig207	PHNK01000208	25	0.641	SSRPIVLGLAALLSALLIPHLNHSSSSCLSLQIPASSALLAPPTSSHILLASSLSVTGTITVGHYLIPPQHSLIRYLRCDHSLLGGVWIGLAIDQLSRSSSPTLDAHQIDKIAAEQAESIYATFILQGAVRLAIRPSARPDTESQTLIIGLGAGVIARHMMHHGSRVSIVELDPIIYEYAKQYFGLPTPNGALYLEDARLFLSRPDPELNAKFDYVIHDVFTGGSVPPSLFTLQCWLGIKRVLRPDGILAVNFAGKPTSQAGLLVFNTILHVFPFCRAFSEMSEDSSQNWDDFQNLVIFCSSLQVLEFRDVHLNDTFGSVHQKNVLRDFQKYEVPLKSILENPVIQNNPQAKQPKVDIMKSSTTPHDDEHGNGKTHDEDNVTRNKLILLKDENMNLLEK…
protein2041	97	Contig14266	PHNK01014265	21	0.374	VILPFNLLWHYVALVSNGNGASFIVFHSGCPSSCHDSSIFPRMRISQSPDSYFDKSQYLLAESAYASGKYIIPAFRGATLENDPKTTFNYHLAQS
protein2055	228	Contig93494	PHNK01092606	24	0.764	MSFYRLSLLVALAAFLPSLAVLSQSLTNSANNQQVMTANAVVSGNGISGVFNFMSQPNSDTFMVQISVSGLSAINSSAEYPYHIHTNPIPPNGNCMGALGHLDPLGLTDAIVCDPLFPAYCQEGDLSGRHGKLLGNVEVYTTKYADSFLRFTPEDFSILGRSIEFHLGNITSSLDGTADKNGNPTGLPSTYIKKYPTSPPPAPAAKLAPFVGTSTISAVIANIT
protein2100	384	Contig30086	PHNK01030059	19	0.791	MILKRTSFILSLLIQALALDHFLIQLPEQLDVKENCTPLNFIKNDLPRPMEFSAHGLLADQGGPIHLFHRNVVKDGFGQLGECDLVDSVFLDLPAPWDALEDCKRVMKRNVISRVCCFSPCIEQVQKTVLTLQRLKFTNIQMYETLRRTYEPAIVSLPSIESAAQKIRQNEIKKENRRLRQIKESKLRNSKNGIPPDSSNDLDKHDLKRTAEQSVLEQCAESSSSLQPHSPKKPRLDETDESLNLSPLAKIDNSERTVSYPRESQPLRHIPSNLILAESDGQMRENSSSPPTANVPLKDLEKRGIDSTRPVVLETCRPVAMTRGHTSFLTFACLLPQLSTPENFDPDQQAKIDDLPIESHEPPLSQNLADEQVGLEN
protein2123	259	Contig21428	PHNK01021424	25	0.376	MSHLSHLSHQIILHPLISSSLSVASTTVGRDKLYRSIQYFARFLVWCLQNNKHSPQSIARWNNLKSALGLSRKLMRIGKPLEHLQSAVKVNIPDRSLAALAISRQLGYAAYLIYDSIIWLEKIRFVVLDKQTSQLVNKRAAQFWLAGLTASIMSGFIKLQQTTVQAAKAKNSLKRLGEEEKDIQISQMKTLKKQSYAIWYQLLQDSCDVLLPSSTLGYHQLNEGVLGAAGVISSLLGLNTQIKKVLSSGASKKP
protein2170	213	Contig30185	PHNK01030158	16	0.636	MILLFNLLLHYVALAQVEMVLLYSIAIQLVCNVNKKFIAFQSGCPGSCHDSSVLQRMKISQTIDSYFDESQYLLADSAYASGKYIIPTFHGETLENDPKTTFNYHLEQSRVWIEHAIGILKGRCSSLWELRIQFLKKLDIKTANHWIMACVILHNILANLKNEWNDLYEEDDPKPAPALPALDSQNILSAGIHSVIMPITLQHFSSSPF
protein2176	151	Contig90148	PHNK01089333	30	0.549	MKHLSTRRLLHSTINAITLLLVLYYKSDSDLEDALAYMCLLSKKCYIITRGPNLYHDPRYDLASILNIPHLNFTQLFRTSPDSFFKLYQLISEHPIFHNNSHNKQRNPAIQLAVALCRFGSNGNGAAVRRLDNLFNIGYGTWLPWIMS
protein2206	151	Contig112949	PHNK01111647	30	0.396	MKHLSTRKLLQSTMNAITFLLVLYYKSDSDLEDALAYMCFLSKKCYIITRGPNLYHDPGYDLASILNILHLNFTQLFRTSHNSFFKLYQLISDHPIFHNNSHNKQRNPAIQLAVALCHFGSNGNGAAVRCLDNLFNIGYGTWLPWLMS
protein2232	144	Contig3126	PHNK01003126	30	0.439	MAKTTGMLLASQFLHVHRLFLYIFESVLREECGYLEPFPYWDETVDAGNFSKSSTIDDFGGVGNYQGIVTSGPFANLTVTLGPGSVNTRRFLSRRINDTVSISSGSRYLSEAMAQTSFSTFMTTTANKLHFAGHNGYVSTQ
protein2252	185	Contig1446	PHNK01001446	24	0.519	MKIFAYGTLYLPLTLFLLFDSKSSVINHLRKNHKLSTKVGIPNWCDSEWEDITHNYLLFSNVIITHSGFHNRIHINRNDTNFLTLGIFSYINQITGQPIPSPAKIKGHGLYFPDHQCIIDFVLGSGIIETIWNSSKDNHQTTKAPPGLESCQDFTHFGCSFQISNKLIQRINKVKKEGKVI
protein2277	88	Contig29395	PHNK01029371	20	0.836	MHFKLVFFSIALSFSLAIAQDAITPPKHTQCYHHFLKKDGCVHAAKNPQRRCDPKTGKPLAYETKGAVKPISSHQVVSQKNTLKDV
protein2284	88	Contig4108	PHNK01004108	27	0.639	MMGLWFLREMATCMLMISGLISEVLSTMYEVEDLMMTFVGLAAPVTRTYTLSVHNSLWGGKIPPEKAHILGWDSKAQGLSSIIENK
protein2328	114	Contig3088	PHNK01003088	32	0.477	MILPFNLLWHYVTFAQMEMVLLMRIFQTTDSYFDNSQYLLADSAYSSGKYIIPAFRGTNLENDPKKTFNYCLAQSRIQIEHAIGILKGRFFSLWELRIKFQKKWKQKLQIIG
protein2349	637	Contig791	PHNK01000792	18	0.774	MFIILFLYCICRPLVNANTPISAYIRAPAPDPPWPQQFLEAAHAECPHSFFNLIHNITYHHSPPPLATVVTDKESYEHYLTQFNASPLVSPYIHSLLFSIALKESHPKISLFNNLTSPQTYPFDHIQPPSNPSSLPTFILYADPYTLDFVPFHRILYRYSNSFPPSIRYLFRWKPSSETLKAAPFTYVPGWAAALHIKNSDYLSVDDRPINQIYHLLEEPFSSPDVESDIVSDIEDGDDKEIKLIPLEADKVQSISLKATQYILSSQNPLKALRALAENFPIHAHKLANKFDTSKLPSTIQNELESNAKIFESGKSKVLLNGKDISDSSLISGPAYMPFSLIRLMRTERVWMSSLVSLGFSCGQSRNLIVNSGLNAYFKGEDGLEKDEDDRLDSSVLGD…
protein2351	257	Contig791	PHNK01000792	20	0.584	MPSNVLLTLALVTSPSWLASPTESLHDLDNIMLSQISPQNSKSGVQAIFDIEHIIIEGHAEEVSTGVSPRGLQLELENILTGAKVDTIVMATLGYFQFKAQTGIYKLKIRPGRSEELYELESLVAKDNANQNAKVSDDLHHEKTNQQVVLSTLEGITLYPKFKKKIAKDQKTSPAKSKTPTSETPQANKEQTENHQGVGNLVLQSNEFLRNGKNQVKDKTENPSLSLKTAQSVINVFTVASGFLYEVRLISN
protein2352	205	Contig791	PHNK01000792	31	0.436	MTFLMIYSYKILFLDVLFPLELEKVIFVDSDQIVRTDLKELVDLDLKGAPYGYTPMCGSRDETKGFRFWDGGYWKSFLKYLPYHISALYVVDLKKFRRMAAGDQLRLRYEVLSSKPHNLANLDQDLPNDMQYVIPILDRARRLIPEWDVYDKEVNKLWGSVFNNASNSDVKEPREGQDRISGNEDGGKTDENEEEHLNDEL
protein2364	137	Contig3466	PHNK01003466	22	0.645	MEMVLLFLKILTITLTNISTSLQTQHMQVENTLYLLSKVQTLENDPKTSFNYHLAQSRVQIEHAIGILKGRFSSLQELRIQFQKKLEIKTANHWIMTCVILHNILAYLKDEWYDLYEEEDPEPAPALPPLIHKT
protein2372	201	Contig99911	PHNK01098874	22	0.404	FGNQYQLWGCLFSSSTLISLAKEAFSSAQIDLCPILNYDSTIFFNIPHVIFEGSFQISQSTQDWKADQLIQGIKTVLKTHQLQAINFMIDNEKMLKEKLDIMAQTIFDLESQHQLCLTGTPLQNRPTDLQSLIFFLRIEKWQEDWLWKNFLFPGLQKGKANSIKSINHLMKNKRCNFVSSKKDSKGDIGSISRSMEV
protein2380	282	Contig2282	PHNK01002282	30	0.382	MKYLSTRKLLHSTMNAITLLLALNYKSDSDLEDALAYMRFLSKKCYIITGGPNLYHDPQYDLASILNIPHLNFTQLFRTSPNSFFKLYQLISDHPIFHNNSHNKQCNPSIQLAVALCCFGSNGKGAAVRLLDNLFNIGYVPPCRLSICKWEVHYTCFPWCNLRNDPKTKFYYQLAQSRVQIENAIGILKGQFSSLRELRIQFQKKLEIKTANHWIMTCIILHNILADLKDEWNDLYEEEDPEPAPALPCLESQNIHSTSIRSVIMPITLQHFSSPPF
protein2414	73	Contig28726	PHNK01028705	22	0.458	MKNSVILPFNSLLHYVALVQMEIMLLCLDDPFNIGYGTVILYTKNYMFSILFSSPKHLLDQLHKSDLNSLM
protein2426	284	Contig61918	PHNK01061638	30	0.432	MKHLSTRKLLHSTMNAITFLLALYYKSDSDLEDALAYMCFLSKKRYIITRGPNLYHDPRYDLASILNIPHLNFTQLFRTSPNSFFKLYQLISEHPIFHNNSHNKQRNPAIQLAVALCRFGSNGNGAAVRHLDNLFNIGYGTYLLADSAYASGKYIIPAFCGATSENDPKTAFNYHLAQSRVQIEHAIGILKGRFSSLWELRIQFQKKLEIKTANHWILTCVILHNILADLKDEWNDLYEEEDPEPPLALPSLDSQIIQSTGIRSIIMPITLQHFTLQCF
protein2428	148	Contig92952	PHNK01092079	30	0.445	MKHLSTRNLLHSTMNAITFLLVLYYKSDSDLEDALAYMCFLSKKRYIITRGPNLYHDPRYDLASILNIPHLNFTQLFRTSPDSFFKLYQLISDHPIFHNNSHNKQRNPAIQLAVALCRFGSNGNGAAVRRLDNLFNIGYGTWLPWIMS
protein2459	209	Contig106350	PHNK01105182	22	0.407	FGNQYQLWGCLFSSSTLISLAKEAFSSAQIDLCPILNYDSTIFFNIPHVIFEGSFQTSQSTQDWKADQLIQGIKTVLKTHQLQAINFMIDNEKMLKEKLDIMAQTIFDLESQHRLCLTGTPLQNRPTDLQSLIFFLRIEKWQEDWLWKNFLFPGLQKGKANSIKSINHLMKVISLRRTKDAILSLPKKIQRGISVQLADPWRSKL
protein2463	82	Contig18410	PHNK01018407	30	0.474	MKHLSTRKLLHSTMNAITFLLVLYYKSDSDLEDALAYINPAIQLAVALCRFGSNGNGAAIRRLDNLFNIGYGTWLPWIMS
protein2526	285	Contig4064	PHNK01004064	21	0.487	MVLKIIAVAVLHSFLKDNCCYLELRSTPRKFAGYQLSDYFSTIIQVIDEFTVTNPSMRVKFIPSISWTTSSEEALSIVDLAIKYKSNYIVGIDISGDFTKGVEFSHLIDPIEKARQAGLPLTLHFAELEYLNEQLDRLKPKRLGHAIFLNDEVKKQIVKNKTPIEICLTSNIKCGSVKDLENHHIHWALKNNIPVLISTDDTIIFKTTLSQEYQQLLQVVERDSEKFIDIIKQGSSSIFGSAEDEEWIKQQLDSFMKKWNKNLEIPNGMHDIDKIRGSVD
protein2555	101	Contig35597	PHNK01035558	24	0.505	HDPAFNLLLHYVALVQMKMVLLGWPSSCHDSSVFQRMRTSQSPDSYFDISQYILSNSAYASRKEDFYFYRNSKSNFKKNGNKNCKSLDNDLHYTPQYPS
protein2567	245	Contig6523	PHNK01006523	20	0.898	MRVLLSYLSAFILLTLVNGQLLEVDAPNNIIPAHHHETVFSLPPPIGPQVTIPSPPLRVAIIGAGAAGSSSAYFLSQFAKASGKEIEIDVFERSQHVGGRSTILWPFDDPYSGYEPLEAGGSIFIHANKHIKKAATMFNLSIGKFGLNTPMGIWDGTEIVFQTTGTTWWDTAKLFWRYGRAALQLNSLTSSLVNKFNAIYGSNFYSKGPYENLTDFSSRLEVKTLFPVTAERHLIETQGVNVLAVNELAAVAARVNYGQDISALHAFGGMISLAGSNGMSIQGGNFQIFHSFLNASRAQVHLATEVTSLTQLIPSFSHNTRTQYSLAYHHNIGHIKPDFSYKTSQIFRPENHKLFDVILFAAPFYQTYIEFKNVSSKPAVPEQPYVRLYVTFIATNATT…
protein2589	297	Contig4291	PHNK01004291	21	0.815	MLSVSFFVLLAHLTFSNVQAHLALVSMEGATNGNVGAGMGIVPSTPRDGTRQAPFQTDTSIIREAEVASGKASPCGRTLAGGVNDIAAGVAAAQASGLPDVGPDGKIRMIGHQINADGGGPYSCQVDTTATGDNFQNVAVDTNIPGKNSRNNAKATDFPLVASMPPGMTCTGGADGKTCIARCINAAGAGPFGGCMVFTQASGADGAGGGGAGAAPAVAAAQTPAKAKAATAKAATAKAAAAKRQRRELSAALIKAAEERELNEELAGLRRRFTPEEILAAEFAELAEERTV
protein2596	151	Contig104562	PHNK01103441	30	0.464	MKHLSTRKLLHSTMNAITFLLVLYYKSDSDLEDALAYMCFLSKKCYIITRGPNLYHDPRYDLASILNIPHLNFTQLFRTSPDSFFKLYQLISNHPIFHKNSHNKQRNPAIQLAVALCRFGSNGNGAAVRRLDNLFNIGYGTWLPWLMS
protein2598	430	Contig5067	PHNK01005067	20	0.545	MKSAFASAALAALASTTLADAGKHRMKLHKMPSSSFDVQSALTSFQSQAAWLSQKYLSRFDGVPQNALYTDDTSDSDQFRIQTIDQRLSYTPGHDVPLSNYLNAQYFSEISLGTPPQSFKVILDTGSSNLWVPSKRCSSIACFLHSKYDCDASTTYKANGTEFKIRYGSGNLEGVMSSDILQIGDIKIIDQDFAESTKEPGLAFAFGKFDGILGLGYDTISVLHTVPPFYKMIDQGLLEKPVFAFYLGKTNANGVDNAGGEVIFGGVDEAHYTGDIHYAAVRRRGYWEVELEAVKFGKDELRLRNVGAAIDTGTSLIALPTDTAEIINAELGAKKSWSGQYTIDCAKIPSLPNLTFTFAGKDFTITGEDYILQVQGQCISAFTGLDMPPNIGELWIIGD…
protein2609	139	Contig6164	PHNK01006164	23	0.527	MVILYTKCCMISILSLKSQTLAWPTPQQQLESSQVMHAEGFPVCVGFVDGMTIPLSQKPAHDGNHYFDFNKRFLQNVLQFHIFHKLKFYLLSRYSIAVQLVCNVSKNFVAFHSGCLGSCHESSVFQRMRISQSPDS
protein2645	60	Contig107775	PHNK01106576	23	0.667	MKLLLEWMVLLTWTWSSRLSSSLVIGQWRRRLWPCLATRRGIGSYCAGRWWIDKVSGSL
protein2658	130	Contig70534	PHNK01070081	18	0.502	MILPYNLLLHYVSLVYMEMVLLGFPSSCHDSSMFQRMKISQNPDKYFNKSQYPLADSAYLFGKYIITAFHGATLENDPKTNFNYCLSQSRIWIEHAIGILKGRFCSLHGNSESNFKNKWKLKLKTIG
protein2666	96	Contig16739	PHNK01016736	16	0.659	MILLFNLLSHYVALAQMEMGFPGSCHDSSIFQRMRISQSPDSYFEESLYLLADSAYASGKYIIPSFRGATLENDPKTKFNYHLAQSRVQIEHAI
protein2667	64	Contig96406	PHNK01095460	17	0.808	MKLLLVWMVLLTWTCGRRSFSSLVIGQWRRRLWPCLVTRRGIGSCCAGRWWIDGVSGSLWWI
protein2690	241	Contig111970	PHNK01110697	22	0.397	FGNQYQLWGCLFSSSTLISLAKEAFSSAQINLCPILNYDSTIFFNILHVIFEFSFQISQSTQDWKADQLIRGIKTRAQTIFDLESQHRLFLTGTPLQNRPTDLQSLIFFLRIKKWQEDWLWKNFLFPGLQKGKNKGFILSLPKKIQRGISVQLADPWSSKLDVLQEGFTEQYGLSRSTDLPWDSSEFLRELMILRKFCNHLIYENLDETTTFDFTWKHSAKICHLICHLKNFLSGER
protein2713	623	Contig13529	PHNK01013528	21	0.647	LLGVLVVIEAFFTLQRLCAAEYSLKNPPLTTNWTDKVGTSPWPEYPRPQLVRENWLNLNGVWQFQAASSPNDVQNPPFGKTLSECILVPFCMESGLSGIMKNHMFSWYKTNFTVPATWKNSNILLNFGAVDNEATVFINGKEAGFHRGGYFRFQLDITKYLHPAGSSNELMVFVYDPTDTDGTKPPIGKQALSPSHIFYTACTGIWQSVFIEPAPENYIKDIYLNGDMLGNLNITVLSALNTTKTPVILKIYDTNLPEKSIESFNLMSDNTTILKIPSKVQLWSPDSPKLYDITLNLGDDCVKTYTGFRTISKGNQNGIVRPLLNGNFIFQMGTLDQGFWPDGIYTPPSNDAMIYDLQILKDLGFNMVRKHIKVETDLFYHACDKMGLLVWQDMPSPGV…
protein2724	321	Contig19782	PHNK01019778	25	0.660	MGLKYFNWLLFALLGSRVLPKCSSKAQPPEQALSNSPSGNYAPVEVKCPPHFTTRRTTTFVGHFSNFLKIGESKYISQKSLKATAMWRQYLSRVGLAEFDIENFLSAAERKGGLAADTLPNIGLAIPGGGVRATLLSASILHAFDDRNPQAQQLSNYIAGLSGYVALALDLVLKILKFQLVYTLRGAWLVGSWATCNFPTFPELNATVWNFTDKNQPTDWETMRKLPGAFRTASKKKKAGFPISLVEFFGLQSETFPIIKITPHHSCHINSRHEGKGEINPVQSIYCTIDYLGTRMQKGAPIDSQNCVNGFDNAG
protein2739	692	Contig23557	PHNK01023549	20	0.462	MVFMTRILLLEIATGSERGRETAPYPPNPPPKSSHANHSGAQSKVDDVDDFDIDMGPKTEPTAEEILEAARRKRAAILAKHQALGENKPTSSELLKTQPDISTPPTSNTPLNPPTISAEVAMETNSASLDSPAGRLRIGSTTPQPPNTTHSDGQISCLLLSNEFAYHIRCIAESLPGTPDVVAEAFDLTQDEGTGGSGELGVDVHPLDNSVIGLPGHQSISAADYNPDDDRRVDDRRQLEKPTKHDGVSVQGHVPEKTSLAVNNGDQGDIVENKNDDIDNDDDNGDDDDDDDDMFAIDSPKKKKKPKRAGCDHHGGVAPFLPVINRGAEADGTVIDNFDDADGYYRVILGELLDNGRYHVHANLGRGMFASVVRAKDSQSKSGKDVAVKVVRSQESMYK…
protein2766	154	Contig117486	PHNK01116085	25	0.688	MKIFTYGTLYLALTLFLLFDSKSSLEYQIGVTPNGKISATNILFSNVIITHSGFHNRIHIDRNDANFLTFGIFSYINPITGHPIPSPAKIKGHGLYFPDHDASLILVWEMVSSKLFGILLRIIIKQPKLLLVWNPVKISHILVAHFKSVIS
protein2775	23	Contig73918	PHNK01073401	16	0.585	MILPLNLLLHYVALAQMEMVLL
protein2858	200	Contig4221	PHNK01004221	17	0.584	MLAIILAPFLLGDGQAILICRRFLLAINKQILINFSPFVSVSTPTSNEHISKTFNVADIAILLLCPVLKSNSRAREERLIHALRMAWQFFAHLSANTSVLNLITLCHPLPYHTAPGYLGWNLGGINGTGKVPDIPGFPSLIDATTPESAKKQFGFNGKKHNLVFSNEFNMDNRTFWPGDDPFLDLNWLTGGKILKD
protein2859	196	Contig4221	PHNK01004221	20	0.652	MTSLLSVCSILALPLSSTTLPCHLVADTLSPTPCSLLSLSLTASQPSSSAVAPSPIFLQRPCQVYGQFSFFTPLPHAFPYDIKNKKIEKEKEITLDDIQKILSSLEPSFLNPVFPVSSSKHSLSVNCGYTSPRRALCYSSILKPELLSFSPGLIPGLALKTEKERKDLVRILSGEVVIAFLEEGHLVEPFAP
protein2860	139	Contig4221	PHNK01004221	25	0.458	MFVIIQMTWLGGCLLIYPTEFSHTLSPHFPTTQSLALIRCQGCPVEREGIEKAAIVARVAPSWLQIGSFDLAHWRQDIEGLKKLVKWVVTHIGLTINYGPYMFMDIYDPDNVCNHTDDMACYSYHNQPDMIKFGLK
protein2867	100	Contig17306	PHNK01017303	22	0.865	MVSSLLATLLGVSLFITRASAECSILKVWGGSGTPTTGFAIDAKGTKWTPMITTLNVPGNFGLREATRAHFTVVVNFDEFDDAADGCCHQQGGSDDAE
protein2882	37	Contig6658	PHNK01006658	19	0.418	MIILFITTILIAHRGTLQYKSLWHFANLVQMGMVLP
protein2899	151	Contig64419	PHNK01064092	30	0.464	MKHLSTRKLLHSTMNAITFLLVLYYKSDSDLEDALAYMCFLSKKCYIITRGPNLYHDPRYDLASILNIPHLNFTQLFRTSPDSFFKLYQLISEHPIFHNNSHNKQRNPAIQLAVALCRFGSNGNGAAVRRLDNLFNIGYGTWLPWIMS
protein2923	531	Contig21762	PHNK01021757	21	0.806	MLCSLSLFFALSLFLPLSSAPSPSLYSTPFEHLPAKLIFFEDTPIILAHDASLRQVYRSPDEGKSWALLDQVPKGSAWILIDHPWDNRLAFILSKEKSHWRTINRGATWQSFDTPSPPAVGLIPLVFHAKRWDWILYSAQKCDPISKSIAAAQICYDEAWLTQDAFASPPRKILDHVSKCIWAFSNKFFKSHVSEQQIFCIAFEPPPENAQPSLPTSFLDRLKALTGGMLNSIRESRLYTSNDFFQHDRQLVNLGLGKDSRGVVGMGAVQRYLVVALRPSSFFSQHSSSSSSSSSSSKESSSSDEMLLFVTENGDNWSRARFPHGHGLKENAYTIVESTQHSIMVDVLTNPVARSGIIFTSNSNGTYFVKSLEHTSRSPSGIVDYEKIVAIEGISIANI…
protein2960	940	Contig124	PHNK01000125	23	0.838	MRFSSKYSFVFLALSLFSLISADSDALQDHLPIPDAGLKPEQQVLMAKTEQKFEFQSDIARLMRVVVSHLYHDRDVFLRELVSNSGDALEKLRFASLTSPKVLDPAPALNISIIADKPGKRLIIRDSGIGMTRDELQKNLGTIARSGTSEFLSKIEKSDQDKKAGTGANLIGQFGLGFYSSFLVADRVLVASKSNEDPKQWVFESDANAAEFKISEDPRGPSLGRGTEITLFIKDDASDFLEVDKLKELISTHSEYATSAPIFLWTEKEEEVPVDEPKAESADDKEKSDDATEKTESSEKLEKSDDKEPTEDTAKKSDDEAKTDADDMKVDSEDDDEEEEDAEDKEEDKAPKTKKVKVASWEQLNTKGPLWTRDPKEVKDDEYTAFYKSLSGAAQDPAS…
protein2969	113	Contig85596	PHNK01084864	27	0.519	MLMIRGLLYPLKLVVVAWHEFGHAVACACSGVQIGSITIDPNVLLPVTDYLGFEVGGTTTVLCEDESYPLASVPAGYISSMLLGGLLTFCGFNTLASKRHEQLVCLERCDG
protein3002	263	Contig41251	PHNK01041193	30	0.462	MKHLSTRKLLHSTMNAITFLLVLYYKSDSDLEDALAYMCFLSKKRYIITRGPNLYHDPQYDLASILNIPHLNFTQLFRTSPNYFFKIYQLISDHPIFHNNSHNKQNNPAIQLAVALCRFGSNGNGAAVRRLDNLFNIGYDSAYASGKYIIPAFRGATLENDPKTKFNYHIAQSRPSGAQNPISKKLEMKTANHWIMTCIILHNILADLKDEWNDIYEEEDPEPAPSLSSLESQNIHSTGISSIIILITLQHFSSPPF
protein3014	1018	Contig7912	PHNK01007912	19	0.528	MNNPAALALSLWLQSLNILPHQQQQQQQEQQEEQQQHQHQNQNQQHQQQHQHSSALHDPLLLWHVLNNIDPLFFSSAKPSLPSHSTPHNPWLLTFTALKKLHKFILRYFHLKLNRSPTPLTPTPNFQKIARDLDPHHATLLVNLILFLAIELDPDLHVRKIQTLPTWAQKQLMLVIESIPDLFPKHPSSSSSHEHSLVDDQSDDELSQLYSEKLILHDQHESLKQVYQDLLNTYHQLELSHHQTQSKLLVSEQEVERLHLSLSEPTHSPSRRKNKQNDDDDDDDVENENEQNNRHSNHQDFLLKSELDRLRTEMSKLESSLISSESTNERQSKLIDDLNKRILELEDIENESRGLKDQIDEYRHATDKLKKMENVVEKYKKKLEDGADLRRQMKTLEDE…
protein3024	151	Contig117803	PHNK01116399	30	0.458	MKHLSTRKLLHSTMNAITFLLVLYYKSDSDLEDALAYMCFLSKKRYIITRGPNLYHDPRYDLASILNIPHLNFTQLFRTSPDSFFKLYQLISEHPIFHNNSHNKQRNPAIQLAVALCRFGSNGNGAAVRRLDNLFNIGYGTWLPWIMS
protein3031	468	Contig4147	PHNK01004147	25	0.615	MFHIKKLGTHILLLQGFMLFFRSAYDIVPLDGQKYMSTFNDSDFEAAMSMIDSWMTAAARGKANIDPALLPWVALRVLLKQAVYGGRVDSDWDQKVLDSFVDNLFLPAAFDVGYKLVPPTEYDEGLSIAEGSRLEQFVTWAQALPEREPPHWLSLPPNAEALVATAQGSNLLSRLLKMRSSDEEELAGDTVKQAKDTANIGQPAWMRSISATANEFLNALSETIGGMSVSMDNSNDPLPRFFNREIKLGQKLLSVIRKDLTDLKAVCDGLLKQTNHLRGLLDDFTKSSIPSHWRRYKVNPTMSLTHWLSNFVLRLQQLNRIASSSDYLSVTNLGLLFFPDGYLTATRQYVSHRTKTSLEELQLTIHLAYDKEEGSKTTGDGFPLEGAELSNGLVVLNDG…
protein3044	65	Contig246	PHNK01000247	20	0.443	MALFTGLLNVSWLLPSSLSPPLQPYKLIILYWMQSSLFPLSSILISASIKPSSIIFILVNSLS
protein3071	365	Contig9840	PHNK01009040	20	0.823	MIFPSMLLVTLAALPVILGTTVHQKHHQPSHHVVKRINPHKKPAPAPLHKKSTEDYGRKFGINPDNLHVNGVAIGFSPAFHEKIDSNTASDINKLLKAPMAIHVGDVLSLPGNPVFQLTLVPSQGLDVITQEVVDKIARKMADIEKKGITTYLRFGHEMNGDWYPWAGQPKSKRCLYRFSILSLLIVILFMLQEFIEKFRMLAIAIRKVTHKTYFLWLMINSPFFLRCPNTKYASGNVHAPHGGYTPYWPGKEHVDISGKLMIYNLMICNPGQKRLNIAPQADEAVKILSEFSAMYGPKGQGTPIMLAETGATYTTSVDGTVPGKGNASEVVIKSEWLKQLVSKETVSKVDGFMAIVWV
protein3086	151	Contig80435	PHNK01079804	30	0.464	MKHLSTRKLLHSTMNAITFLLVLYYKSDSDLEDALAYMCFLSKKCYIITRGPNLYHDPRYDLASILNIPHLNFTQLFRTSPNSFFKLYQLISEHPIFHNNSHNKQRNPAIQLAVALCRFGSNGNGAAVRRLDNLFNIGYGTWLPWIMS
protein3162	166	Contig85094	PHNK01084376	17	0.378	MNAIALLLVLYYKTDSDLEDALAYMSFLSKKHYINLRGPNLHHDPRYDLSLHSQHSSTKHSLKLFQNSPYSFFKLYQFISKNPIFHNNSQNKQCYPAIQLDVALCCFGSNGNCASVRRLINLFNIGYGFLKVLTHNLTNLSTSLQIQHMQVESTLYLLSVLQL
protein3221	23	Contig1489	PHNK01001489	18	0.381	MILLFNLLLHYVTLVQMEMVLL
protein3265	1278	Contig19544	PHNK01019540	24	0.750	MNLTRLCLLGLALVPLIARPSAAVKRGDFKTCEQASFCARHRARADRAANSKSWKSPFSIDGKPSLSHGKLQAVVRNALYPHVSFSLVIWFAEDATIRLQVDEINGLRQRYNEAHHWTLIRELVLDHSVSLSHSSSPPASHVTSTRNPSFTLSLVHSPLSIVIYRDGVPHLTLNERGLFDVEHFRTKESLPSHPLPSGYDGFAHQSEDGMWEESFGNREDSKPKGPEALALDITFPGYSHVFGIPEHASPLSLKPTKPTPLADSVYSDPYRLFNLDVFEYEADSEMALYGAIPFLQAHRKSSSVAVFWLNAAETWIDVEKFATKPEVKKSFKDRKIKTADGGPTDVTTSTFWISESGILDLFIFLGPSPESIAAAFAYLVGTTALPPYFSIAYHQCRWN…
protein3278	172	Contig77302	PHNK01076726	22	0.400	CGNQYQLWGCLFSSSTLISLAKEAFSSAQIDLCLILNYDSTIFFNIPHVIFEFSFQISQSTQDWKADQLIQGIKTVLKTHQLQAINFMIENERMLKEKLDIMAQTIFDLESQHQLCLTGTPLQNRLTDLQSLIFFLRIKKWQEDWLWKNLLFPGLQKGKANSIKNQSIT
protein3327	141	Contig51955	PHNK01051851	17	0.379	MNAIALLLVLYYKTDSDLEDALAYMSFLSKKHYINLRGPNLHHDPRYDLHSILNILQLNIHSNCFKILPILSSNFINSSPRILSFITILKINSVILLFNLMLHYVALAQMEIVLLGCPGSCHDSSIFQRMRISQSPDS
protein3336	94	Contig116201	PHNK01114837	22	0.395	RGPAIQLAVALCFFGSNGNSASQLESSQVMKAEGLTGCIGFVDGTTIPLSQKPAHDGNYYFDFKKSFLQNALQFHIYHKLTFYLLSRYTIYI
protein3356	500	Contig109998	PHNK01108757	16	0.646	MKLLLLLMVLPHVDMVKQVMFFIADREVEKEVIAMQAFKDKDWVKLSKAVVDRWGVRFTMMDLNKIVGDWQAKGGVSSMADFKKLCVQFDEVVEYLILVDELVHENQAKDLFWSACSRDIRMDVLKDLSRKDLMKELPNGEQKLPALEVIKDNIQAHLKLLALDKYQESCTQYVSKVSEVLAENNDIMVKAQEAKKAQMGLPAAKVEGNVDNKMVDHLANLTKQLKIFVQETQKANKAPIASLSTSTSYQSRGYERQNYNGNNNGNRFPGNGRNGGNGGNGYRGGYFEPKSPSDLVRRSLTAERRARLEEVTDEDVNAKGGKNGNGNGGKADKVKEKEVSKATFSTSFGGLELATVAQVEGSCMAGEYDVNAARRAAATKAKSSIQSQLRANPGKANNK…
protein3370	90	Contig146	PHNK01000147	21	0.779	MNRVILLFNLLLHYVALVQMKMVLLIRISQSPDSYFDETQYLLGDSAYSSGKYIIPYCHGATLENDPTTTSNYHLAQQRVQIEHAIGF
protein3407	142	Contig118013	PHNK01116609	26	0.562	MIRMLSRLRSFWASLVASSLYLASQEFTLPAEESNFNPDCPIERALHILARLTHLKSKVPDTFDSSTSQLIAANFSITPLCQFRNIIIDVIISIIILKSREAAANITQAESKKRQRSRNKKKQQICSNLMSLIMILFRR
protein3476	314	Contig42765	PHNK01042698	23	0.899	MFRIASFVTLAIFLTSYEVVLAVPPSAPVPPGGHGVSPIATEALGSAATTGGAGGAAQTCVAYYMQTQKCAYPTSTADCTPFTVTTTLDMIVNHNIMFISFPPTDPSELEKDAGPNPVHTTSTVATPASVGGTSSLGSNSSTSANTTTLTNTTATTKTTPALTSPHVRRSLATNSSLSAPTSLLAKPTVGGTAGLMPSVSFQKSLLFLTFKREVQDSNFHLPLNFIDIIQNTSAEGICGRYNPETDLAVCLFSGIDPQGLDPQKGGWVSSIINHPGSSPMTAKITDGCNFNAATNVDGCGNIFVTSAM
protein3540	85	Contig20887	PHNK01020883	16	0.868	MILLFNLLLHYVVLAQMEMVLLGCPGSCHEPPIFQRMRISQIPYSYFNESQYLLSGSAYASQKYIIPVFCVATLENDPKPTFN
protein3642	194	Contig16832	PHNK01016829	14	0.448	MVLSTLLARVADGLPLAASVDDEQVESDLAEHKHQAKLIFKKLNQTSEPRCTIESGKYTLQLLLYALRLLFYRRHWLSFCYASYIISNDVVYLSITNKSYPRKLAFSYLDELSKEFERSYGSEINKPNLRPYAFVKFDTFIQRTKRLYQDTRTQTNLDRLNEDLGEVTRVMTKNMEDLLWRGDSLDRPSP
protein3644	228	Contig104454	PHNK01103334	17	0.474	MNAIALLLVLCYKTDSDLEDALAYMSFLSKKCYIKPRGPNIHHDPRYDLQSILNIPQLKFTQLFQTSTDSFSKLFQLISNHPIFHNNSHNKQNNPTFQLAFALCLFDSNGNGAAVRHLDNLFTIQYAYASGKYMIPAFHGATLENDPKTTFNYSLAQSILQIEHAIGILKGRLSSLRELGIKFQKKMEIKTANNWIITCVILNNILADLKDEWNDIYEEEDPEP
protein3655	396	Contig60950	PHNK01060687	19	0.421	MKLLLEWMVLPTWTLVKQIIFFIGDRSVEKEIVAMSGYKKRDWKLLCREMVDRWGVRFTMVDLNKVFSEWQSYGGVGNLNSYRKFLLQFDPVVEYLVEVEELAHENSAKDVFWSALARDVRMDVLKELSRKELMKTLSNGDQKLPALDKVKEAVEAHLKLLAVDTYQEGCAKYVSKVSEALAEEEVRVKKEEKNLVQVPKQERDPMVEQLADLTKQLHIFFRRLRRDVSEGKVEFDGRAFKFPDGSFVKPSEGQAPVDLVRRRGGLNQRRPRFEEIPDQGKSSGKEDEDFKGKGKEANKFSFSTSFGGLELYSCGGKLGGECLAGVYDVEAGKVGRPKSSSQAQPKPKASKVNPKLSAARKKYRKEELYKMQKGIADMGPPSLRALDMN
protein3656	111	Contig1780	PHNK01001780	16	0.610	TLIVILILILKKILFFYQKWPGNVTFFLESLKYFIPPSTLLKPFLTYLYPVLDRCSGLLRNFFKNFLSLFRTNPSFTIILKNNNVILQFNWSSHSVVWAPTLKGTKKLS
protein3680	196	Contig28830	PHNK01028809	19	0.368	MIILFITTILIAHRGTLQYKSLWHFANLVQMGMFIAFHAGFPGACHDSFVFQQMMISQKPENYFDEQQYILANSAYTSGTYFIPEFVWLVMKILKNHNSTLILPSLEFASLREMRSPLCNQKEIKVMIDWIISCLILHNLLAHLKYECNNLYEDEIPKPPPTTESSFSSSSQPGGMCAKIFPITLAHFENTD
protein3746	163	Contig88325	PHNK01087550	22	0.404	FGNQYQLWGCLFSSSTLISLAKEAFSSAQIDLCPILNYDSTIFFNIPHVIFEGSFQISQSTQDWKADQLIRGIKTVLKTHQLQAINFMIDNERMLKEKLDIMAQTIFDLESQHRLCLTGTSLQNRPTDLQSLIFFLRIEKVARRLVMEEFPFSRFAKRKG
protein3768	151	Contig21985	PHNK01021979	30	0.545	MKHLSTRRLLHSTINAITLLLVLYYKSDSDLEDALAYMCLLSKKRYIITMGPNLYHDPRYDLASILNIPHLNFTQLFRTSPNSFFKLYQLISEHPIFHNNSHNKQCNPAIQLAVALCCFGSNGNGAAVRRLDNLFNIGYGTWLPWIMS
protein3772	284	Contig106811	PHNK01105634	30	0.432	MKHLSTRKLLHSTMNAITFLLALYYKSDSDLEDALAYMCFLSKKRYIITRGPNLYHDPRYDLASILNIPHLNFTQLFRTSLNSFFKLYQLISEHPIFHNNSHNKQRNPAIQLAVALCRFGSNGNGAAVRHLDNLFNIGYGTYLLADSAYASGKYIIPAFCGATSENDPKTAFNYHLAQSRVQIEHAIGILKGRFSSLWELRIQFQKKLEIKTANHWILTCVILHNILADLKDEWNDLYEEEDPEPPLALPSLDSQIIQSTGIRSIIMPITLQHFTLQCF
protein3779	150	Contig99911	PHNK01098874	22	0.404	FGNQYQLWGCLFSSSTLISLAKEAFSSAQIDLCPILNYDSTIFFNIPHVIFEGSFQISQSTQDWKADQLIQGIKTVLKTHQLQAINFMIDNEKMLKEKLDIITGPLTFKVSYFFLESKSGKKTGYGRISFFQVCKKERLILLNQSIT
protein3786	289	Contig102506	PHNK01101432	30	0.468	MKHLSTRKLLHSTMNAITFLLVLYYKSDSDLEDALAYMCFLSKKCYIITRGPNLYHDPQYDLASILNIPHLNFTQLFRTSPDSFFKLYQLISEHPIFHNNSHNKQRNPAIQLAVALCCFGSNGNGAAVRRLDNLFNIGYGTNLSTSLQTQHMQVESTLYLLSVVQTSENDPKTAFNYHLAQSRVQIEHAIGILKGRFSSLWELRIQFQKKLEIKTANHWILTCVILHNILADLKDEWNDLYEEEDPEPPLALPSLDSQIIQSTGIRSIIMPITLQHFTLQPFNF
protein3832	569	Contig18203	PHNK01018200	17	0.493	MLIFIFLQFFRWLSERYPLVLQLIKQNRIPSFVTLTMILLSISCPSSFHSLIRPCCSSSLLSSHLISFSSLSTEEKIFLAIFSYVDFLFNLIKPQKWFFLAVDGVAPRAKMNQQRARRFRTAKANEAAYQKALEKSQVVHDDRMFDSNCITPGTPFMTRLSEQLKWFVNKKVSEDSNWKNVKVVVSGHEVPGEGEHKIMEYIRLAKAQPEYDPNLRHCLYGLDADLIMLSLLSHDPHFCLLREEVTFRASAKSKSKSLEFQNFYLIHISLVREYLDLEFSSLKDPELVKTTGFKYDLERIIDDFILLCIFNGNDFLPHLPGISIQDGSLNLLFDVYKRVMSLPPESDGTHYLNDFGILNIGRLQLIMDELIKFEADQFLLENADQSWLEGKQSAKLKQL…
protein3847	151	Contig77743	PHNK01077160	30	0.468	MKHLSTRKLLHSTMNAITFLLVLYYKSDSDLEDALAYMCFLSKKCYIITRGPNLYHDPGYDLASILNILHLNFTQLFRTSHNSFFKLYQLISDHPIFHNNSHNKQRNPAIQLAVAPCHFGSNGNGAAVRCLDNLFNIGYGTWLPWLMS
protein3867	349	Contig4946	PHNK01004946	18	0.735	MLPAIFCFYLFLSKALANNTSVKSKLEAANIDSLFPGDDKFTQATKPFNMRFAGITPAVVTFPKNVDDVSKCLIIASQEGLHVSPRSGGHSYAAHGLDLVTLLLPYTNKEVLGFLMEPVPTLDLVATVCLEGMYLAQIGYINYIDCFFVVRFGFISRLWGLTLDNIIEHEVVLANGTITHASAILNPDLFWALRGAGASFGVVTAITFQTHTVPKKPTDFFYSWDFSASQFTQALISFQKNCLRKDLPSELGIEVNIGNGSISGKINFSLSGMYYGQNAEFQKIIDPFLSNLPKRDRQRVVITDWIASLQSTAGSQNLSSSGIFIFSFPIITRFKYITKAGIE
protein3882	103	Contig694	PHNK01000695	22	0.472	MFTIFLIIVPSPIATMNQTLSTKQIPSGPSNYDLNCSLGSIILMYTYGHQFEEIDTKPDSTAKPPSPCSLLKFVDNPVLRNSVIEEILSNKQSYIHGLKKL
protein4008	174	Contig20581	PHNK01020577	21	0.828	MIRKNYFLLLLLLYTLEIEGQNLKVSIRSTDDFCMVVPKGLKTNIGNSEFPGGMIVSCQQPGRGGQATFSGQFWTSVNYETPKSGVVQLTGCINPSASEHLNPDDGGGQYDSNGGTNGQGNPEGSTCEQYGTYVELIEPSARRACIRCCQDPLSNFRTPHYLYKYLNRGFN
protein4025	69	Contig6658	PHNK01006658	30	0.419	MRSPLCNQKEMKVMIDWIISCLILHNLLAHLKDEWNNLYEDEIPEPPPTIESSSSSSSQPGGILIIY
protein4030	278	Contig13703	PHNK01013702	30	0.425	MKRLSTRQLLHSTMNSITLLLVLYYKSDSDLEDALAYLCFLSKKCYLNARGPNIYHDPQYDFHSILNIPQLNLTQIFRTSPYSFFKLYQLISEHPIFHNNSHNKQRNPAIQLAVTLCHFGSKYSIAVQLICDVNKKFIAFHSDCPRSCHDSSAFQRMRISQTPDSYFDKSHGKYIIPAFCGASLENDPKTIFNYHLSKSRVWIEHAIGILKGKFSSLQELRIQFQKKLEIKTSNNWIMTCIILHNILADLKDEWNDLYEEEDPEPALALPSLE
protein4041	299	Contig62480	PHNK01062191	30	0.548	MKHLSTRRLLHSTINAITLLLVLYYKSDSDLEDALAYMCFLSKKRYIITRGPNLYHDPRYDLASILNIPHLNFTQLLELLPILSSNFINSSPIILSSITILITNSVILPSNLLLLYVALAQMEMVLPGCPGSCHDSSVFQRMRISQSPESYFDESQYLLADSAYASGKYIIPAFRGATSENDPKTAFNYHLAQSRVRIEHAIGILKGRFSSLRELRIQFQKKLEIKTANHWILTCVILHNILADLKDEWNDLYEEEDPEPPPALPSLDSQIIQSTGIRSIIMPITLQHFTLQRF
protein4055	71	Contig6658	PHNK01006658	29	0.360	MMMCVGFVELNTMVAVLISSYRETTVHSGRCTHIFHLHCILKWLNQDSSKNSCPMDCQEWGLFFGFLFP
protein4119	457	Contig20552	PHNK01020548	23	0.475	MSIVFPKLLVFLPDSQFSAAEAQTVTYYDALEYLVTIAIAHHDLLQPLIIQLIQRLERFQQDPLYAHHMLLALYAVLEQHAFRGSLNVLAAQFDLIGPPLFNIFLKMESTPPTHLKLLIDAGKIINLLVQHLDLHQQQKFAGALHEAFHLRKMGNLSVESDIPQPSVSTGVIVEVPGETLSTENMLPFLWCTDDEKFHCRLPQIVVTAALRLLCSIVNRRASGTQLPLFWSTYIEPSDQVTPSQRYLALQIWVWIVKALLVRSEKTGYEYLEKLMLFMQTDADGRKIAKLLGIICDETDQVLSSKNFAVVKILWKQRFFSFIIPKLINGYGDSTVVDEGKRLVYLTALASLVQQAPSQFFGSELNQSIRISALKILSIIPHAGPETSVSSPPATTTTTA…
protein4205	248	Contig18009	PHNK01018006	30	0.462	MKHLSTRKLLHSTMNAITFLLVLYYKSDSDLEDALAYMCFLSKKRYIITRGPNLYHDPQYDLASILNIPHLNFTQLFRTFPDSFFKIYQLISNHPIFHNNSHNKQRNPPSNLLLLYVALAQMEMVLPGCPGSCHGSSVFQRMRISQSLTHTLMNLSTFLADSAYASGKYIIPAFRGANSENDLKTKFNYHLAQSRVRIEHAIGILKGQFSSLRELRIQFQKKIGDQKCKSLDLDLRNTPQYSS
protein4312	252	Contig24349	PHNK01024341	30	0.478	MKHLSTRKLLHSTMNAITFLLVLYHKSDSDLEDALAYMCFLSKKCYIITRGPNLYYDPQYYLASILNIPHLNFTQLFRTSPDSFFKLYQLISENPVFHNNSHNKQGNPAIQLAVALCRFGSNGNGASVRHLDNLFNIGYGTVILYTKRCMIAILSLNGFPGSCHDSSVFQRMRISQSPDSYFDESQYLLADSAYASGKYIIPAFRGATSENDPKTSFNYHLAQSRVQIEHAIGILKGRFSSLQELRI
protein4325	261	Contig107419	PHNK01106228	29	0.504	MHLSSRQLLHSTMNAITLLLVLYYKSDSDLEDALAYLCFLSKKCYLIARGPNLHHDPRYDLHSILNIPQLNFTQLFQTSPDSFFKLSQIISNHPIFCKNLHNKKCNPVFQLAVTLCLFHSNRNGAAFIAFHSGFPGSCHDSSVFQRMNISQNPDQYFDKSQYLLAESAYASGKYIIPAFCGATLENDPKTTFNYHLAQSRSPGTQNPISKKMEIKTANCWIMTCIILHNILADLKDQWNDLYEDKDPEPCYSSPLP
protein4327	261	Contig107419	PHNK01106228	29	0.504	MHLSSRQLLHSTMNAITLLLVLYYKSDSDLEDALAYLCFLSKKCYLIARGPNLHHDPRYDLHSILNIPQLNFTQLFQTSPDSFFKLSQIISNHPIFCKNLHNKKCNPVFQLAVTLCLFHSNRNGAAFIAFHSGFPGSCHDSFVFQRMNISQNPDQYFDKSQYLLAESAYASGKYIIPAFCGATLENDPKTNFNYHLAQSRSPGTQNPISKKMEIKTANCWIMTCIILHNILADLKDQWNDLYEDKDPEPCYSSPLP
protein4328	110	Contig105360	PHNK01104218	18	0.377	MILPFNLLSHYVSLVQMEMVLLMRISQSPDSYFDKSQYLLSDSAYASGKYNIPASRGATLENDPKITFNYHLSQLIVFIEHAIGILKGIFSSLWELRIQFQKKNENKN
protein4342	157	Contig2969	PHNK01002969	24	0.520	MYFIKPWFFKLGSILYGATQVYGVVKNIDPNNIPNKTEEGQYGYNKCSGSPSPNSLCQTAWINNATDFCVFGPPYLDGVSEHERNAVVYCTQPTHSTRLIPKGTFTAVHYVAEGFGNPRGAIVLGPKGQFEQWTEFLLPDEMCIRACFKGPEDW
protein4353	68	Contig34956	PHNK01034919	23	0.592	MVILYTKHCMIAILSLNSQTLAWKTPEQQPESCQVMQTKGLPDFVCFVDGTTTTLSQKPAHDGNHY
protein4374	330	Contig86550	PHNK01085805	17	0.735	MTYKTILLLSFYLITATEVTISSSYNVNSTQRLSSSPDCTGQLDYQAVYNDIANVLPDSNFDDGSYAPIIMRLALHASVTYDPATNTGGSNGATMRFCPEKNYPANRGMENARNRLEPIYHKYSELGLTYSDLWTLGGVCAIQETGGPKVAWRAGRKDGQPGDSPPDGRFPNPRNGAYHLRQVFYRLKFNDQQLVALSGGHTLGRCHLARSGFDGPWTFTPINFTNAYYKLLKEEHWQLKKWKGAPQYEDQRTQSLVMLPTDLSLTKDAILRYWVDRYAENQDLFFKDFSASFSTLLELGVPSQNFQGRYPTLFKTMAEQNICN
protein4381	128	Contig364	PHNK01000365	24	0.673	MILPFNLLLHYVVLVQMDMVLLGCPGSCHDSSIFQRMRISQSPDSYFDKSQYLLEDSAYASGKYIIPAFSGATIENDTKTTFNYHFSQSRVQIENAIGILKGRFSSLRELRIQFQKIIEIKTAKH
protein4418	202	Contig12401	PHNK01012400	23	0.654	MVILYTKCCMIAILSLKSQTLAWPTPQQQLESSQVMQAKGFPGCVGFVDGTTIPLSQKLSHDGNQYFDCKKKYSIAIQLFCEINKKFIAFHSGFPGSCHESSVFQRMRISQIPVTYIDQSQYLLADSAYASGKYIIPAFRGATLENDPQTTINYHLTKSRVQIELAIGILREDFLVSRSSESNFKKKNWGSKQQIIGS
protein4456	365	Contig18488	PHNK01018485	27	0.510	MSHEIRTPIASILGLIELLLETSLTAEQKDFAETIKSAADGLLGLVSEILDFSKIESGKLILQESPFDIQVLVRQLERIFGYTAKEKGTQLKCTVEVPPSEIVIGDQNRIRQVMTNLLSNSIKFTKFGSINMFAKLYRNSSHFFNPSSPSEPHNMILAVTVQDTGIGISSKTLSQITKFQPFSQANTSTCRNYGGSGLGLCIVKNLVDGMGGNVTIESDGPGKGCTVKVTMMLKSISSPVSNGTPSNFSTTCPLDDANTTSTSSSTPPDPVQILTPSQISSLPNIPSLQRSRDQYSILVAEDNPVMSRITQTFLIKRGFNPDLAENGKAAVDQALKKFHDSGGVSSYDLILIDLLMPVL
protein4460	161	Contig98921	PHNK01097910	22	0.469	MSSQIAMFFAFWFFSSRITNVLKPRNPFYETSPREPSSSKRSLPPHLTTQELKVLKKVRKRAYCLDMGFSLCGFRFGWSGIIGIIPVAGDAFDTAPSYLLIIKPALRCNLPPSLIAPLFEDFIVLRVEKKFKSATAGQPVIIHDLVAGGSQIPISSTP
protein4469	430	Contig7141	PHNK01007141	16	0.444	MNSTLQALLHTPCLAFGLLDRAVHSPQKCAERKGGKRFCAICAMNDLIHACAKAVSKGDASIFPKSISANLWKFAPTMEVGRQEDAHEFLRFLIDRIHDDAVKSRAELSRKIKRQRLFIACLMANCGLASPATPVDRLVILSKHSLTLGHLAYNPLWSHFVNMTYWMEKININANGQYLTNDLVHMNLQNCKVLRDAKKALSIHKAPPILTIHLKRFSPSGRKIGRLISFGETLDLQTAMSEGLKSARYTLYASVSHSGDSNHSGHYYAHVKASDNEWYSMNDSMVSSCPVSEVLGHQNAYLLFYAREMCDVLPETMKGESAESSQLGKRKQRPEHGDTEATSSACKKRRRDKKGQFMKKSVSRLSNGLTVSKPRKSRSPRPFIGPVRPSPQLASTLPE…
protein4471	188	Contig154	PHNK01000155	24	0.497	MKIFAYGTLYLPLTLFLLFDSKSSVIKHLKKIMNLQPKLEYQIGVTPNGKISATNIFYFLMIHIDRNDANFLTFGIFSYINPITGQPIPSPAKIKGHGLYFPDHRCIIDFGLGNGIIKTIWNSSKDNHQTTKAPPGLESCQDLTHFGCSFQISHKLIQRINKVKKEGKVNRFKKTLSRSKKYGD
protein4499	165	Contig61039	PHNK01060775	27	0.601	MIWPPFSTFLILTSPNFLELLPILSSNFINSSLNILSFITIPITNSVILPSNLLLHYVALAQMETVLLYSIAVQLVCNVNKKFIAFHSGCPGSCHDSSIFQRMRISQTPDSYFDKSQYLLADSAYASGKYIIPAFRGATLEMIPKQNLIITLPNQEYELNML
protein4552	251	Contig19451	PHNK01019447	26	0.433	MDRSPTFSSSTQLIVGILALQGAYADHLAHLLRLPNPPSAILVRTAAQLDQCHALIIPGGESTAISLIAKTSNLLDPLRLFVRSKPVWGTCAGMILLAQEISHSSQKIGGQESLPTIPIRVTRNDWGRQAESFEYPISIPAIKNPTEPFPAIFIRAPVMHTILDRQAATILATVPFTPALRSTRSGSSDPNPSDEADPNAGPDAHVVALSMKNVLVTSFHPELSPDLRLHEFWLQQVLAWYSASQT
protein4583	32	Contig55849	PHNK01055686	16	0.462	MAVVCLLALAIYTHTTTESAAVAKLFLYEPG
protein4601	78	Contig10024	PHNK01010024	23	0.481	MKILVMLMRLYLGFVKPPEVEDWVKRRLDNEGKLVKKRDGNYKYPGLEEVETEVEAEMKLRQVELPQLGLLWIMRR
protein4634	424	Contig24743	PHNK01024732	18	0.911	MITSIPLLLLLVDCILAQQVTSPSGASYAPTLQACPSNKPLVRTTGSFASGNQTISPQEIEYQTQRRKVTAPLWQTFLRDGPGRNTGYDPKQLAGENDENWPILAIAYSGGGLRASLFSAGIADAFDARTTQSPVAGVSQLSNGHSGLSGGSWFVVSQAIHGHPTVQEMVVGQAPGWILSQDLIIPGDGNPFRDLQYIRQVHSQALPKLDAGFNTSIVDMWIRILISCCILLYHIHIHIHIFPFFVSYFQNFDILTSFWFISVSPPDFYKIEGSNDHGNGYLFSDIQNSPAFTSHSIPYPIVVACHQAPENRVQDVPGVNSIVSLHSTVWELSPYEFGSYDPSLSAFTPMEALGTFANNGKSYLPQFIREKQQAAADSLADSQTGICTKGFDQASFVMG…
protein4676	488	Contig13210	PHNK01013209	18	0.703	MWYFNVVIAIRFAFCMAAQNSADDVLSFLDTLAHSHPLPSDRPSTPLTKNLSHSSLPLPPSSPSPDAQSVLDFIDHITQRSAAPPPLSRANSPSTLNHPPLPLPLSRRSSPSSESSPFSPSASHSPTHPPPLAPSVDNNPSSRLAWSAWGSVFKGATSVISHAKQAAEQVQSVVSDQAKSSDLVKNINTNLSDRTQKWTEGVINYVKASGIDQLGKDLQATGLKSLSDIINTVAPPISPHEVIQVQLSYDMVGYDGIEDLVYQTLAKIMEQVEGGDLVLNRGLEEKAKQRGPGDPERDLNAVEGFTDAHKLAMANLDQMIKIKIESDAKPASTSGSSEPAQPGEDHSSNPTPVTNCPVFMRIQPTIASLPGIMTESNEKHLWFLLILKDVANSLVFQAL…
protein4704	67	Contig66343	PHNK01065975	20	0.731	MKDFINWILFCAILHNLLADFKDQWLEFYEDEQVETPPTISNTKTSQSTSIRAKILPITLAHWDS
protein4752	335	Contig539	PHNK01000540	19	0.650	MRLLSLLIPPLAALFVGASQHPFSFDEPSSSSHLPHSSSPSPSTATSPPPPPKLTSFTAQLILKITGWNHTTVAQLLGEASTRRPHPFIHYVDDSNWKDVFESPIDSVRTGWGSSEETVWVVIIAANDRISAIFEDAFELVAANSSLASTDHPPPPKMREDQFSVNQLQPDDPGLFPPYIRFARIDYMTKSDYLLTKWLIFKFCHFVFFHSFFWPCISSSSVGNRLISFVELSLFRCPVIAVITQHGKELRFFKPGFTPPTPEHLGNFIRHRTYLLKPPWSSRYSPGGSSSWLASNDPVQYAWKQLNVMAACTYHTSQSQEYCCSTTKN
protein4765	295	Contig55	PHNK01000056	22	0.824	MRILIIFSTIVLAALCLRVRAKKSDPRPHHTQEKKNPFISVKNGHFYQGKQKIFLVSMNYWSAMHLAASDEAGGNLTRFKTEVRQLADHGVNNVRIPRRLLSLVYSPTEFILLCRSHLVSTSNDQRHTFHQNMALDNEKIFRGLDRALVEFRKHGISVVMTLHNFWVWSGGYSQYVSWATNTKIPYPPHNDPKISSVTQKWFRNHISKVINRVNTITGVSYKNDPTIMTWELTNEPQEPPLEWIRKTAKFIKKLAPKQLVTVGFEGKTGEWWFKRVHSPPEIDYACGSAF
protein4766	159	Contig55	PHNK01000056	24	0.363	MKIFAYGILYLPLTLFLLFDSKSSVIKHLKKIMNLQPKLEYQIGVTPNGKISAMNIFYFLMIHIDRNDANFLTFGIFSYINPITGQPIPSPAKIKGHGLYFPDHRCIIDFGLGKWYHSKLFGILLRIIIKQPKLLLVWNPVKISHILVAHFKSVIS
protein4818	443	Contig70382	PHNK01069932	30	0.465	MLPGEFLKFKVLPFLPLVCQLSLFHLKTPITIKSTYDSNVDSFPVFSMYIFRLQQMAQFFFLWQITISSSLSQSEFTEILLQPLIKLYACPDRAVDSPFWSSCLSMLTNWKNLQKIWPNLVTGFTDTVPVILYSVLLIVPKLSECLLNNDLICHLEKTQVNTDPEIRTNTCILLDHLSKSLTPSTCHKVLIPAFTCSLRDSFPPARMAGLMALIAKVEYYEPEDLARKVIPGMAICLVDKEKLAFKALDMFVECVRKAASEMPKTAINPLPSGALNKSSLASKTSAPGLAICAAGAAGALASWAFSSVSRKLTSRLESSSSSLSITTTLGSSTPQVLTSQTESSPLTEKMPPSLQMASKETISSWGGNLMDVEADADDWSTFETGPPVSDPSFIPLPST…
protein4832	227	Contig153	PHNK01000154	32	0.505	MSQLTPFPLFNLPLHLILSIFSFLDLPDLHALEKTNHPTLVALSNDHVLHLLRRRAVPAHLAPKLLNRPHPKDLVRLNTFKGLNLASKLKRGSYLSSPTSIKTFELSSNLNRKFLAIRLARLLNRRACSWDQLCQKGIIDQEFGNPSLLSGRLAPVIRVLKQKFKRDHIARLINHQSSSRLFTYSYPSCYLSNASFSFLLFFSAHRLLTTISPEPYPTPSVSS
protein4850	564	Contig533	PHNK01000534	22	0.815	MKSYFLFFSLVLSSFSTLVRSTKWKPDAILRIHQGDLTIGCSIRTSTIINNTSPGPPLRFQEGQHVWIRVHNELPHENTTLHFHGISQWGSPWADGTPQTSQPLVDFLIMNSIWSVEALGPRFSIVTAYGSLVVEEATSLPYKYDEESTLILADYYLASDEKILQGLENVPFKWLGEPQSISINGKAMGSCNSTISKCSSTCEHHVVHVKPDSVYRIRAIGITALTFLYMAIEHHSELLIIEADGNLLRPTKANYLQVHSGQRYSFLLKTKTISELKKLGQTTFWANVESRWRPVRDVGAFVLSYDVDFGKQDEDRKKSQVPRPTDLNMTVPVPGEGVQWVEDNFAPLNRNTCHIKKKDVTRRIIVKGQQIQGSNGSVGWFVNGAKYSENAPSVPYLVQ…
protein4858	2030	Contig28263	PHNK01028242	20	0.920	MSLLHLVFAALTLSLVVIALEPPSVVYSLETQRPPVARAGIFFSWAFLPNTFGTSSGSTGLSYSVSNLPSWANFDASTRLITGTPNSSQVGITSVSITAYNEDKSGSVSSVLRLLVANGKEPVVKLPLANQLGNGSVLGSATYNHANGGISVPPNWSWSIGLLPDTFSSPAGAEIYYTAYEEGKTTLPSWMTFNAYTATFDGVTPDSQTEVNISVFGSDFYGYGDVVQTFTFSVSEHALDLVEPLPPLNATVEGTVNYTVPIDGITIDRLPLNSSSAVTFSMDLTSTPYFNYDPITRSLTGSLPRDILALKNITIPVTINSPLCHNRISTNITLRVFAGLFTAPVLPVVHISPGKLFTINLSSYTTSINATYTIGDIFPPASQRWIHFSSSSLQISGTP…
protein4867	238	Contig22402	PHNK01022395	16	0.406	MIVVAILIVMEGLSAFLHALRLHWVESNGKHYAGGGYAFEPLTLRSESMSLLQFFIPLDAAHGVVVRLGETGLIQFNDLNKSLPPLKRHYLNQLQKLAHLSDHLSYFESLLLHHRIPSSHHQSLQSSPDSLHLLHTDIAQLDHLLENLAVKLRTINQSYQSSHHQLGYLEECRHVLQETSIFLDRFTNKPSLLSNTEIKGPLISSVAALPSDASTFEIEKAQAIRKVVFIIFAR
protein4883	120	Contig43225	PHNK01043157	17	0.779	MLILPFNLLLHYVALAQMEMVLLGCPGSCHDSSVFQRMKISKTPDSYFDESQYLLEDSAYASGKYIIPAFRGATLENDPKTKFNYHLAQSRVRIEHAIGILKGQFSSLLELQIQFQKK
protein4911	242	Contig3984	PHNK01003984	22	0.484	MVLYWATALSWIETVMVVGLGEDRFARSSDINWMLAEAQIAVQGIIGNITLGVLKSGFSTSEGFAGVNQDGLFLNETPIIQQNKIQREYEKILKLKTLCKLWRTFQLIKNLLQLPCEYQGVNGALAGPETISSCGKDDIMMSIVRAQVNGKKLYKNMYNASLAEEKYGFSPEFLTNSAWKCQSKYGVFEYNPYSQQVNETARFSDMLKSSFEEPCDFNMPVCDLTLPGEMFFVVKLVI
protein4915	290	Contig35776	PHNK01035737	17	0.908	MLYLSFLLLIPAFAHAQSAAGLTSLIGSLSVTCQSACGGLLTSNFGTCSNVIGLVPVISTSGSVIDPLQKWISEICTSQPCSDDVISSALKSVQQGCASDVANGVSTAVALTTIVSNYDQIRNLACTQAASNMTYCLPSLLSSVQTGIKSNITVTMIENILSTGTAALGPIVKQLPDSSYCTDCTHGIITQLGKIKTINTTSNATASNVTSTTNASVTPAAALSAISDKCGSSFVDGQIPSTLKVPNESSAKTGTKSAASLSLHASFSRCLVGVALVGIVCSALL
protein4924	240	Contig3888	PHNK01003888	20	0.754	MHYSLIAFTFSSVLIAVSAQQAQHSLCYNYFLNKDGCVYSSKDKPCPEKHTDAHLLHPSNYGSYAGYTTSTTSTMIDSSNSSASNATTGALTSANASDASNLTSNSSNITTGDTNNLTASASGNVTNSTLGNITGGATGNISSNFTTSAISNTTNFTDSLSSSEAVTKRLARRYDSSQRNCGFYNTTTEMGVCLWTGIPDNGSSPAIAGWLNVVKSIALVMFSVVAAPTPYSTLVC
protein4966	187	Contig8159	PHNK01008159	22	0.586	MFNFRVLMLSFSGIFGDLTAGMLTTRAADGTLHSRAMAPASTEGLVFEFIANSHSGKLEEISHDPSCNVSFYDPSSTDWVSISGKAKVIEDSQKIEQIWNPATKIWFGDLGDGKHTGDYNDPRVIAIQIVPYEIRYWHAKSKVSQLVDKAKSAVTNDTAAPGHLRIINSKELENLRGVCNKQV
protein5022	190	Contig47945	PHNK01047860	30	0.454	MGAGVVNASELFLLYTCTTLFKLGLRCWAPNFSEQHDSLYNEACRISATMTFQQALVVNAYKFMNVNQNYINNLGIMRQAYHLYVHYVMAQRNECEKKIQGKFLHEEKKVIKNAHKRIRNARFKFAVNNNFHVCYKEIISCLQAHSGDKYNPKRDAYIVKDLPFPSESSDAFSFCLDAEMKLSGKN
protein5031	235	Contig9902	PHNK01009902	22	0.404	FGNQYQLWGCLFSSSTLISLAKEAFSSAQIDLCPILNYDSTIFFNIPHVIFEGSFQISQSTQDWKADQLIRGIKTVLKTHQLQAINFMIDNERMLKEKLDIMAQTIFDLESQHRLCLTGTPLQNRPTDLQSLIFFLRIEKWQEDWLWKNFLFPGLQKGKANSIKSINHLMKVMSLRRTKDAILSLPKKIQRGILVQLADSWRSKLDVLQKDSLSNMGPPEALTSLGTHLSF
protein5041	198	Contig15906	PHNK01015904	21	0.564	MRTIIHIITIISSIVQISQCHGFVKSWSADGGKLELAQKQSLSETAFRKAPDNTGWIGGQFTNSPSMTCGSSYTPFGKIEAPGGTMFSSAQESAKKTMQVKAGGKLELIIAGEDGKGWPHKDGYIQASLGLCGTDAHACENFDASKSDFTKIQSEDNGIPELMKKYESEHDGNRWTIPIPNDISSGSYIMRLEL
protein5084	255	Contig2280	PHNK01002280	25	0.415	EAVFLHVKLLWGLFGSNLVPPQSSKELSKEFYKRFLLVKEVKQALKSCNSPELIAKTDIITLRKGLQGNHKVGKGMTNISEFHIFNLHSKLPEVGICIWGPNLNEAMDSLFNLAFCLTAIDSFCQLASSVAYSFMNIDLTTVERIPLIFGAYNHFFHYVLKSWYKKELKEAGKHSNYEFKKNIQKNCERFFRQLDLVTQKDKIISGKKNCKRIKKLPQVPQESIFTEPPSNLLIYFSIHGWLKSLSLSQK
protein5085	157	Contig1126	PHNK01001127	23	0.503	MVILYTKRCMIAILSLKSQTLAWPTPQQQLETSQVMQAEGFPGCVGFVDGRTIPLSQKPAYDGNHYFDHKKRFLQNVHQFHIFHKLTFNLLPRYSITIQLECDVNKKIIAFHSGFPSSCHDSSVFKRMRISQIPDSYFDKSQYLFEDSAYSSEK
protein5121	315	Contig5024	PHNK01005024	21	0.814	MLSVSFFVLLAHLTFSNVQAHLALVSMEGATNGNVGMGIGIVPTTPRDDTSIIREAEVSSGKASPCGRTLAGGINDIAAGVAAAQASGLPDVGPDGKIRMIGHQINADGGGPYSCQVDTTATGDNFQNVAVDTNIPGKNSRNNAKATDFPLVASMPPGMTCTGGADGKTCIARCMNAAGAGPFGGCMVFTQANGANVAGGAGAAAVVAPVVAAAQTPVTGVPTTKAKAATNVAAAKRRRRELSAALIKAAEERELKEELTGLRRRFTPEEILAAEESELKEELTGLRRRFTPEEILAAELAELADDPTV
protein5209	72	Contig23339	PHNK01023331	16	0.780	MILLFNFLLHYVALAQMEMVLFSSLKTQHMQVESRSYLLSMVQLEKMTPKPPLIITWHNQEYGLNMLLVF
protein5276	65	Contig45767	PHNK01045689	20	0.448	MHMFSFLLGVLSNIRFTSVSERFITEIDTLNRIALVREQKDVEMKLGLLIKVSTTQNLSSRSF
protein5293	199	Contig6872	PHNK01006872	24	0.390	MKIFAYGTLYLPLTLFLLFDSKSSIIKHLKKIMNLRTKVGILNWCDSEWEDISHKYLLFSNVIITHSGFHNRIHIDRNDTNFLTFGIFSYINPITGQPIPSPAKIKGHGIYFPDHQCIIDFGLGNGIIETIWNSSQDNHQMTKAPPGLESCQDFTHFGCSFQISHKFIQRINKVKKESKVNLFKKTLSRSKKYGD
protein5307	106	Contig8940	PHNK01008940	22	0.513	MIPITNSIILPFNLLLHYVALDQIEMVLLTTIPLSQNPAHDGNHYFDCKKRFVRNLLQFIIIHELTFYLPSRYSIAVQLICDVNKKFIAFHSGFPGSCHGSFVF
protein5354	596	Contig88828	PHNK01088042	35	0.752	MAQSLMGRRLNGSLAGMKLLLLLMVLLHVDMVKQVRFFIADREVEKEVIAMQAFKDKDWVKLSKAMVDRWGVRFTMMDLNKIVGDWQAKGGVSSMADFKKLCVQFDEVVEYLILVDELVHENQAKDLFWSACSRDIRMDVLKDLSRKDLMKELPNGEQKLPALEVIKDNIQAHLKLLALDKYQESCTQYVSKVSEVLAENNDIMVKAQEAKKAQMGLPAAKVEGNVDNKMVDHLADLTKQLKIFVQETQKANKAPIASSSTSTSYQSRGYERRNYNGNNNGNRFPGNGRNGGNGGNGYRGGYDEPKVCSYCNRRGHRATVCFALDKDMDAGRVLFDGKVYKFPDGSFIKPSDGQSPSDLVRRSLTAERRARFEEVTDEDVNAKSGKNGNGNGGKADKGK…
protein5379	61	Contig3616	PHNK01003616	19	0.769	MNSVILLFNLILHYVSLAQMEMVLLSMIDILSLKSQTLSWLTPQQQLESSQVMQAKGFPG
protein5384	180	Contig22192	PHNK01022186	19	0.510	MQLLFYTVSALITALNTAGLSNRSTLNQLAPSTSLLLPLAHGYNSSCSQVSQKPYGDTVDQFGHALSYSGENVTKGTPPKKGGAIWLKPSIIFAGGTKCCETLDEVRKYLDYIDTTIISYMSIRQQFVLEAGRFKASLEDVRAPSRASKVIQHAEQLAQQFGLAPWIANVRTGSFQS
protein5401	53	Contig94848	PHNK01093938	17	0.444	MKISIFFQILLMRMESMYFLLYGEQLQKTVKMPSSTIIWQSQESILNILLES
protein5463	64	Contig48009	PHNK01047924	20	0.888	MKLLLVWMVLLTWTWRSKSFSSLVIGQWRRRLWPCLATRRGTGSCCVGRWWIDGVSGSLWWI
protein5543	163	Contig36817	PHNK01036777	22	0.398	FGNQYQLWGCLFSSSTLISLAKEAFSSAQINLCPILNYDSTIFFNIPHVIFEVSFQISQSTQDWKADQLIRGIKTVLKTHQLQAINFMIDNEKMLKEKLDIMAQTIFDLESQHRLFLTGTPLQNRPTDLQSLIFFLRIKKWQEDWLWKNFLFPGLQKGKV
protein5555	225	Contig4344	PHNK01004344	23	0.649	MFFTPQLLLIMIFFSGFPNLEKYPLDPYSRDGWNLNNLPIAPGSLLRYIKSDISGMTQPWVYVGMVFSTFAWHKEDHNTYSINYHHWGDTKTWYGVPGEDDSKLEEAMKLAAPDLFEQQPDLMYQLVTLMSPGRLKKAGVRTYACDQRPNEFVITCPRSYHSGFNHGFNLNEAVNFCLPDWVSEGYLGVKKYKELHKVPVFSHDELLVSIFSHEKSPRHSR
protein5583	74	Contig17110	PHNK01017107	20	0.583	MTPIFLLFGIFSYINLITGKPIPSPAKIKGHVCSKQFGTLLRIITKQPKLHLVWNLVKSLLILDVLYKLVKS
protein5595	284	Contig83727	PHNK01083028	30	0.462	MKHLSTRKLLHSTMNAITFLLVLYYKSDSDLEDALAYMCFLSKKRYIITRGPNLYHDPQYDLASILNIPHLNFTQLFRTSPDSFFKLYQLISEHPIFHNNSHNKQCNPAIQLAVALCRFGSNGNGAAVRHLDNLFNIGYGTYLLADSAYASGKYIIPAFRGATSENDPKTAFNYHLAQSRVRIEHAIGILKGQFSSLWELRIQFQKKLEIKTANHWILTCVILHNILADLKDEWNDLYEEEDPEPPPALPSLDSQIIQSTGIRSIIMPITLQHFTLQRF
protein5654	99	Contig84230	PHNK01083520	16	0.792	MFLIFNLLLHYVALAQIEIVLLGCSGSCHDSSVFQSMRISQTPDSYVDKSQYLLADSAYASGKYIIPAFRGASLENDPKTKFNYHLAQSRVQIEHAI
protein5663	210	Contig17736	PHNK01017733	21	0.594	MLKDILKLLLFSAMMYEGCAHSFILTLEGANNVKTAGFGTRLLARGALQQNTGIIMDKEIEAGKVGPCGRIFGGDSLPPFVIDVQHELEIAQANRIPEPREDGTFEMGVFVHNADGSGPFTCEYSADTKLQNFVPLQIIQQIEGVKGINPAAKNYVYPLVAGFNTTSKCSGGEDGKVCVVRCRNPLGFGSCVAVRFTGQYGRKTRQ
protein5676	67	Contig8057	PHNK01008057	16	0.782	MILLFNLLLHYVALAEMEMYLLADSEYASGKYIIPAFRGATLENDPKTAFNYHLAQSRVQIEDAI
protein5694	817	Contig4365	PHNK01004365	28	0.363	DVEDRDGTRLSLVFSFSFFSLLSLTHSLHFHSWNVWPSSRIESTRIVVPIAALYTPLKQRDDLPPVLYEPVTCKPPCRAVLNPYCQIDVRGKLWICPFCLQRNAFPPHYKDISSTNLPAELLPKYTTIEYTLSRPAMYPPIFLFVVDTCLDEEDLKALRAELVISLSLLPPNALVGLITFGTMAQVHELGYAECPKSFIFRGTKDYSPKQVQDMLGLSQRPMAVPTPGQPGAPIQPNLQTTGAARFLLPVQQVEFSLTGILEQLQRDPWPVANDKRPQRCTGVAVSVAVSLLETTFPNTGSRIMLFAGGPPSQGPGQVVSTELKEPIRSHHDIDRDNVKYFKRACKFYESLSKRSSSNGHAIDIFAGCLDQVGLLEMRSLANATNGFMILSDSFATSIF…
protein5710	82	Contig2448	PHNK01002448	22	0.623	MLFKLLLHYVALVQMEMVLLGCPGSCHESSIFQIMRISQIPDSYFDKSQYLLADSVYASGKYIIPAFCGATLENDPKNHF
protein5768	157	Contig6832	PHNK01006832	33	0.400	MQIGSLPIFSRLSVAANICAAVLSFSFPPTFSKDSPHQVHQTTIFKRSPDDLTILEPALNHSSLNVQTYPLHQLDRRGQLFEGKATYYTTGLGACGINNHDSEFVVALNQAQYQARKRCFKMITVHYKEKSHPAQVVDLCPGCPYVSFQSPLDP
protein5827	185	Contig3340	PHNK01003340	24	0.521	MVEEIPLAIQSSALLTAFLATLAAPSTTLSSLPSAPHPHVHPTARTTHLSPFIPSFSPLGLSSATHLDAPTPLADTLSSVIASIDTHTVALSTLSFQSRQLARERAKLETLINKRKADNVERAVKGLPPLPPSAEEAALQEPSRLETMCALSGVEGSARALCESSGIDLLRAFGAKAGASA
protein5831	324	Contig26899	PHNK01026881	19	0.421	MKLLLEWMVLPTWTLVKQIIFFIGDRSVEKEIVAMSGYKKRDWKLLCREMVDRWGVRFTMVDLNKVFSEWQSYGGVGNLHSYRKFLLQFDPVELAHENSAKDVFWSALARDVRMDVLKELSRKELMKTLSNGDQKLPALDKVKEAVEAHLKLLAVDTYQEGCAKYVSKVSEALAEEEVRVKKEEKNLVQVPKQERDPMVEQLADLTKQLHIFFRRLRRSIRHLLSLEILIGGLEGHRSNDCWALNRDVSEGKVEFDGRVFKFPDGSFVKPSEGQAPVDLVRRRGGLNQRRPRFEEIPDQGKSSGKEDDGWQGKGEGGQ
protein5861	181	Contig3273	PHNK01003273	15	0.752	MLLFLLAFPLLVFSHTLDLPSRTTRCFFEDLHVDDKMTLTFQVAGGGHLDIDVSLYDPNNSLLWSANRRDTGTFTFTATTDGRHNYCFSNQMSTVTTKTVSFNIHGVMYVEDEGHVAPIENEIKDLASGLEAVKEEQEYIVARERLHRNTAESTNRRVKWWFVIQTGLVLAVTAWQIF
protein5958	69	Contig27809	PHNK01027788	22	0.682	MEMVLIFLIILTNTLTNLSTSFQTQDMQVEITLYLLSKLQLKKMTQKHLLIIIFHNKEHKLNMLLGF
protein5975	110	Contig69506	PHNK01069079	30	0.463	MKHLSTRKLLHSTMNAITFLLVLYYKSDSDLEDALAYITSHNSFFKLYQLISDHPIFHNNSHNKQRNPAIQLAVALCHFGSNGNGAAVRCLDNLFNIGYGTWLPWLMS
protein5977	219	Contig61342	PHNK01061071	30	0.465	MKHLSTRKLLHSTMNAITFLLVLYYKSDSDLEDALAYMCFLYKKHYIINRGTNLYNDPRYDLASIHNIPHLNFTQLFRTSPDSFFKLYKLISDHPIFHKNSHNKQCNPAIQLAVALCCFGSNGNGAAVRRLDNLFNIGYGTNSQTPDSYFDESQYLLADSAYASGKYIIPAFCGAILENDTKTKFNYHLAQSRVQIEHAIGILKGLFSSLRELRI
protein6107	151	Contig3373	PHNK01003373	30	0.470	MKHLSTRKLLHSTMNAITFLLVLYYKSDSDLEDALAYMCVLSKKCYIITKGPNLYHDPRYDLASILNIPHLNFTQLFRTSPDSFFKLYQLISEHPIFHNNSHNKQRNPAIQLAVALCRFGSNGNGAAVRRLDNIFNIGYGTWLPWIMS
protein6110	263	Contig3439	PHNK01003439	23	0.807	MLRIASFVSLAIFIASYEAALAVPPTVPGAPAVPGLSGSPAGASQTCLSLYIQTQKCAYPSATENCPPFVVTTSVDMIFPPTDPSELAKDESPIQVATTPAVATPVEATSTLASKTLAPVLANSNLHQLCTCSCFASHKTISFYYLSNSLTANATGGAAIMPSVCGKFNPAVDLGVCLFAGVDTLGLNAQEAGWVSRLVSHPGSTPVVAKILDACSFNASTNAAGCGELYVTSALFKALKPSAEEASTNVLKGVTWSL
protein6230	93	Contig30973	PHNK01030946	24	0.363	FSGLLKNFFLNCFILLRTTPCFTIILKSHNVIHQFNWPSHLFLMSTKNLYVFSLAILDHVMIPMSFKECKSQKSLNFFLMKISIFWMIQLM
protein6232	764	Contig15275	PHNK01015273	24	0.521	MAWPSNVPSSLLILLDNFRMAACFSFGSFQVKQILHVEKSAFQDVLVFQSVSHGNVLVLDGAIQCVENDEFSYQEMIAHLPLNTHPNPENVLVIGGGDGGVLREVLKHPSVKSATLCDIDEAVPRVSKLFLPHMASGFNDPRVTVYIGDGFEFLKNKPGQFDVIITDSSDPNGPAEALFGIPYFELLKRALRSGGTISTQGECIWLHLPLIHSLLKGSKDLFPTVGYAYTSIPTYPSGTIGFIICSLDANRDLTQPLRQVRPTRYYNKKVHEASFVLPEFAKLAVTAAKLNQPMPALCGGQELIVTKKKILLLGSGFVAEPAAEYILRRSENELTIACRNINTAKALAAELSRPSNCIALDVNDPSALDKAVSEHDLIVSLIPYIHHVQVIKSAIKFKK…
protein6236	121	Contig7740	PHNK01007740	27	0.603	MIWPPFSTFLILTSPNFLELLPILSSNFINSSLNILSFITIPITNSVILPSNLLLHYVALAQMETVLLGCPGSCHDSSIFQRMRISQTPDSYFDKSQYLLADSAYASGSTLYLLSVVQP
protein6315	540	Contig4550	PHNK01004550	30	0.555	MLLCTLYFFYYLPCFMLTYLLSDTKYVDCSKHVDDRLNTLQQNLNEWFDELCWYSPSLILLDNLDRLFPAEMEHLDSFRFRQASESFLEISKKALNEKIIIMIGTCTAISGVNGLLRSSAGYLFNESVGLNSFTSSSRKEIFLSLLEAKNKAVRGALMWDKLNLSKFSSGKTEGYLPIDLKDLVDRALVSSLMKKANLILDEKNQDTIHLQDDDFEMGLTEFVPISLREVKLQKSDVEWADIGGKFSLVLRLWVNQAEKKNLFPLTGLQETRRILRETLEWPTKYSQIFKGCPLRLRSGLLLYGYPGCGKTLLASAIAKECGLNFISIKGPELLNKYIGASEKSVRDLFDRAQAAKPCVLFFDEFDSIAPKRGHDSTGVTDRVVNQLLTEMDGAEGLEG…
protein6317	360	Contig4550	PHNK01004550	32	0.366	MAKTVNLRLVDLHSSLVHLPVLLSAQLSSQGIAPQSIGIKLTLPPCPSHSLFLGWSGLASQSSFPSSPSTHWGDIEVDKHLIPSEWMSYADHHHFIQGLRLELKRNLAIATTVEVDPMSPDDWEILVKCYNLGNSTESNPEHLETHILSQVRVIQPSQPILIWVWGKTLITLKIIRIESSSPSDVEEYLLSNATELIVAPKSRLPGPSASMSSHMINNLETSVPALPYSDRSAILKILPSVISLPFSQSINLDADPLISLNQHDFDEYSKIFPSTLSSLQHLVKPPAFTATSSGDSEDKSTRSRVLLERVRVASRGNEIPQGFIWIEDLSLRRRIFKDDQTKGDGEFELVRFVN
protein6344	72	Contig113560	PHNK01112248	18	0.792	MILLFNLLLHFVALAQMEMVLLMRISQTTDSYFDKSQYLPEDSAYKMTPKPPLIITLPNQEYGLNMLLGF
protein6371	159	Contig1797	PHNK01001797	22	0.521	MSTYIAAVSTFFQALLPLVVTQSPRRITLHGQHASFFDWIDAPSAAPLLTISNHISTLDDPLMWSFLPWKSLSDPAKIRWSLGASDILFNNPLTSFLFSRGQVIETVRGRGIYQPAIDQAIQHINLSHWVHIFPEGRVHQPCHPHSPHSLLRFKWG
protein6379	287	Contig111558	PHNK01110291	30	0.505	MKHLSTRQLLHSTMNAITLLLVLYYKSDSDLEDALAYLCFLSKKCYLIARGPNLYHDPQYDLCSILNIPQLNFTQLFRTSPNSFFKLYQLISEHPIFHNNSHNKQCNPAIQLAVALCSLWLKWKWCCCKTGCPGSCHDSSVFQRMRISQTPDSYFDKSQYLLADSAYASGKYIIPAFCGASLENDPKTKFNYHLAQSRVRIEHAIGILKGQFSSLWELRIQFQKKLEIKTANHWIMTCIILHNILADLKDEWNDLYEEEDPEPVLALLSLESQNIHSTWHTL
protein6410	209	Contig117412	PHNK01116012	22	0.483	MTRRLGTTGLISLDVLNLAVTHQGGGLVDAYCAAFSNTLVNKHFIALNDTENFQKSHRLVIYNLGKTKISYKLGHTPAGTALTFKKGSIVPSPWPVPLVEPQAKVSFSVESFDLPPGEKAIIKVDFSAPVELDVEKLPVYSGYINFHTDVECESHNILYYGVVGSIKKVSRDNYTLPSLDSAITGLPFDSKKIVTMSQQQQLGKI
protein6414	151	Contig106738	PHNK01105563	30	0.504	MKHLSTRQLLHSTMNAITLLLVLYYKSDSDLEDALAYFCFLSKKCYLISRGPNLYHDPQYDLRSILNIPQLNFTQLFRTSPNSFFKLYQLISEHPIFHNNSHNKQRNPAIQLAVALCCFGSNGNGAAVRHLDNLFNIGYGTWLPWIMS
protein6434	151	Contig74365	PHNK01073846	30	0.396	MKHLSTRKLLQSTMNAITFLLVLYYKSDSDLEDALAYMCFLSKKCYIITRGPNLYHDPGYDLASILNILHLNFTQLFRTSHNSFFKLYQLISDHPIFHNNSHNKQRNPAIQLAVAPCHFGSNGNGAAVRCLDNLFNIGYGTWLPWLMS
protein6480	27	Contig94884	PHNK01093973	23	0.593	MQGGFWLGLRLLLRLMGPHCWTWSGK
protein6523	165	Contig15359	PHNK01015357	29	0.607	MVDFSSLSLHSLSLFLSLSLHISSLIYSSILYVNTGGQDDLVTAYSPLEQKVIARCQGHASFVTGIAFDPWRSDDRTFRFASVSEDCKIIFWDLSSAALSRPKIQSSQIGRHSINSSLSLSLTRRRTIESQLTLACPSTDREPGFHPSPGRNEVAILQPVMV
protein6527	201	Contig105268	PHNK01104128	22	0.399	FGNQYQLWGCLFSSSTLISLAKEAFSSAQINLCPILNYDSTIFFNIPHVIFEGSFQISQSTQDWKADQLIQGIKTVLKTHQLQAINFMIDNEKMLKEKLDIMAQTIFDLESQHQLCLTGTPLQNRPTDLQSLIFFLRIEKWQEDWLWKNFLFPGLQKGKANSIKSINHLMKNKRCNFVSSKKDSKGDIGSISRSMEV
protein6532	66	Contig5416	PHNK01005416	28	0.453	MKHLFTRQLLASTMNFITLSLIADFDANSDLENTLAYSVTSNKGGQILFMIPDTIFTKFSEFLF
protein6553	521	Contig20207	PHNK01020203	22	0.510	PDIFAHLSLQLSSFHLFFAAAVLHQRGLLPQPQPIKDSHGNILLWNGEIFDGLHLLPSQNDTRQLIDQISKCGPDFLPQILSSIHGPYAIIYYHALSHKLWFARDHLGRRSLMKWVSKVPNEEMIIIASHFSPELADSAEEINASTISCIHLASSSLDIHQVKHQRPPYVLNTIFNPSFDDSKLFDMDHLPDVLLQCRDKLHSALTTSVQRRTQNISDLYVSYPDEAQLAILFSGGLDCSTLALLAHLSLDSHKPIDLINVAFENPRSLRNSSSFELPNTSNSSFNVPDRVTGEQSWLELCSLAPNREWRFIKVDVEFSDYKRYKDKVIQLMKPNATVMDLSIAAALFFAARGIGKCSYPPHFEKSTVSSVAYHSRARVFLSGLGADELLGGYSRHRSA…
protein6556	193	Contig15386	PHNK01015384	24	0.645	MILPFNFLLHYVALAQMEMVLLGCPGSCHDSSIFQRMRIPQTLDSYFDESQYLLADSAYESGKYLIPAFHGATLENDPKTKFNYHLSQSRVWIEHTIGILKGQFSSLWELRIQFQKKLEIKTVNHWIMTCVILHNILADLKDEWNDLYEEEDFEPAPALPSLESQNIQSIGIWSIIMPITLQHFTSQHF
protein6558	338	Contig24474	PHNK01024466	21	0.672	TTASSNLALILASLPSVAGAAPSTRQLLSLIRHCQRSTVAIPQNCIRIPAIWMSLLKKLSIQPKLTLMEEIFGYLCLKNKQAIFPFMEMTTSAHPSRLHLARKNSPYAIDRYGQDPNRRRFPLQDRYIEVLPLTNALETDEGETWNVMKIGYQLKQVRERLAKGLVDKGVLRTEKRNFLLFDMATHPVSDATFKDDVLRRTLSLLTSRTAAVPTTDLYASTVRYRTIRAVAMVCAAFAANVLENALVHLSYEAREAAFQKCDELLSEFSQWPFGNGGQNSARSPSVGVGSGATETNNANLLEIARLCRSEMGSGDELNLEIVAAVLHVFSKM
protein6566	212	Contig103307	PHNK01102214	30	0.488	MKHLSTRKLLHSHMNAITLLLVLYYKSDSDLEDALAYMCFLSKKRYIITRGPNLYHDPQYDLASILNIPHLNFIQLFRTSPNSFFKLYQLISDHPIFHNNSHNKQRNPAIQLAVALCCFGSNGNGAAVRRLDNLFNIGYGTTQHMQVESTLYLLSVVQLQKMTPKLPLIITLHNQDGMIFMKKRILNHHWHSPPLIHKSFNQPAYAPL
protein6580	282	Contig21198	PHNK01021194	30	0.495	MKHLSTRQLLHSTMNAITLLLVLYYKSDSDLEDALAYLCFLSKKCYLISRGPNLYHDPRYDLRSILNIPQLNFTQLFRTSPNSFFKLYQLISEHPIFHNNSHNKQRNPAIQLAVTLCCFGSNGNGAAVRRLDNLFNIGYVPPCRLSICKWKYIIPAFHGATLENDPKTKFNYHLAQSRVRIEHAIGILKGQFSSLWELRIQFQKKLEIKTANHWIMTCVILHNILADLKDEWNDLYEEEDPEPAPALPSLESQNIQSTGIHSIIMPITLQHFTSQHF
protein6592	80	Contig36519	PHNK01036479	25	0.675	MVILYTKCCMIAILSLKFQTLAWSTPEQQLESSQVMQAEGLPGCVGFVDGKNINLSQKPAHDGNHYFDRKKRFVQNLL
protein6603	708	Contig3209	PHNK01003209	27	0.572	LLSSSSSSSSKILIFIFIFQAGNCSAGPACQFSHQLPEVGQGKPVCQWFVKGNCRFAHKCALPMSMDRKNKRAAQAAAREAAASGAASGDTSSHPAGAKSGEQVSMHGAGELDDGSAANPSSSNRLDGSSILNASADDPHRLSQPSRFGFASSNRQNIPFDHLSLNSLPPHLRHSLHSPKSSATLGNQQHSQLSELARDSLLWSSSSRALSPDRSCMPIAINNRSPAWPRDQSPGPFGTSPFSAPGSKSLFLPPNSSVGSDDGFPRSAPSMSASPTRPSFSPSKSILDPTDEHFKLWNHLHHRHRDGNSDDDDHHHHNYINNDDDDDDDNVTELLPSSLHSLLTPEERHRQRFKKLNQQHNLFSGDSLLSKSVPHDHVITGSLAKPPYRSLASPNNPNH…
protein6642	261	Contig107419	PHNK01106228	29	0.504	MHLSSRQLLHSTMNAITLLLVLYYKSDSDLEDALAYLCFLSKKCYLIARGPNLHHDPRYDLHSILNIPQLNFTQLFQTSPDSFFKLSQIISNHPIFCKNLHNKKCNPVFQLAVTLCLFHSNRNGAAFIAFHSGFPGSCHDSFVFQRMNISQNPDQYFDKSQYLLAESAYASGKYIIPAFCGATLENDPKTTFNYHLAQSRSPGTQNPISKKMEIKTANCWIMTCIILHNILADLKDQWNDLYEDKDPEPCYSSPLP
protein6654	151	Contig17340	PHNK01017337	30	0.393	MKHLSTRKLLHSTMNAITFILVLYYKSDSDLEDALDYMCFLSKKRYIITRGPNLYHDPQYDLASILNIPHLNFSQLFRTSPNSFFKLYQLISDHPIFHNNSHNKQHNPAIQLAVALCRFGSNGNCAALRRLDNLFNIGYGTWLPWIMS
protein6672	181	Contig14120	PHNK01014119	22	0.734	MEVVLLHCIIAILSFKSQTLAMPTPQQQLESSQVIQAEGFPVCFIAFHSGFPGSCHDSSVFQRMKISQNPDHYFEKYQYHLADSAYAKNDPKTSFNYHLAQSRVQIEQAIGILKGRISSLQELRIQFQKKEIKTANHWMMTCVILQNILANLKDEWYDLYEAENPEPAPALPPLNHKP
protein6693	113	Contig77085	PHNK01076514	22	0.400	FGNQYQLWGCLFSSSTLISLAKEAFSSSQIDLCPILNYDSTIFFNILHRAQTIFDLESQHQLCLTGTPLQNRPTDLQSLIFFLRIESGKKTGYGRISFFQVCKKERLILLN
protein6751	143	Contig79155	PHNK01078544	22	0.408	LLHSPMNSITLLLVLYSKSDSDLEDALAYLCFLSKKCYLIARGPNLYHDPQYDPNSILNIPQLNFTKLFRTSPNSFFKIYQLISEHPIFHNNSHNKQCNPAIQLAVALCCFGSNGNGAAVRFLDNLFNIGYGMWLPWIMS
protein6774	64	Contig66661	PHNK01066290	12	0.381	MTCLILHNILAALKNQWNDLYEEEDPEPVPVLPSLESQNIHSTGIFSVIIPITLHHFGTQPF
protein6857	107	Contig378	PHNK01000379	19	0.499	MPYIFLFIPLFLPFQTIALEALITLFAFTPIDSGGLEFQASQKVETNVSNIRNWIGPYDIGYNNSVYSNFSFSSITTAFRYSQIVQMVHERLSNYLSVLFVSNVH
protein6978	348	Contig1099	PHNK01001100	35	0.480	MFVWPHKLILKTCGTTTLLLGLQTILNIAKETCGFPAVWRCFYSRKTFMFPERQHGPHKAWAQEVSYLDSIFGNGSAYTVGKMNGDHWLLYLTQPCENALFLPSSDNDQDHQTDDQHLSSNLTPSTLLARSPLPGEQDSTLEILMTGLSTRASAQFYSPSPTSTSPVRYPEGPSANGQALGLAVAKSIGLDAIDLIGDGQVDAFLFSPCGFSANFVGGNDGTRYATIHVTPEPGWSYASFECNVDFTAKSDQLSQVIDRVLGVFEPQRMSVTMFISQDESSSEPMDHSNNHNNHNNNNIDPASDLGATFGKDLAPGYRRTDRIVYEFEGYDLVFATFEKISL
protein6998	143	Contig27839	PHNK01027818	22	0.388	FGNQYQLWGCLFSSSTLISLAKEAFSSAKIDLCPILNYNSTIFFNIPHVIFEGSFQISQSTQDWKADQLIQGIKTVLKTHQLQAINFMIDNEKMLKEKLDIITGPLTFKVSYFFLESKSGKKTGYGRISFFQVCKKERLIL
protein7091	150	Contig111098	PHNK01109841	30	0.458	MKHLSTRKLLHSTMNAITFLLVLYYKSDSDLEDALAYMCFLSKKRYIITRGPNLYHDPRYDLASILNIPHLNFTQLFRTSPDSFFKLYQLISDHPIFHNNSHNKQRNPAIQLAVALCRFGSNGNGAAVRRLDNLFNIGYGTWLPWIMS
protein7178	203	Contig20225	PHNK01020221	24	0.522	MSLPSSTQQVIPLLASLLTTLHASSSSNQKPPTAILAHPHTLFIHSEGSLAKFGGDLAWGCGYRNLQMLYSVLRKLDVYRQLLLFHSIHTITNHNNNSKNNSVLRPSAPPSSILSSTLKDCSSPHTSPPPSINQSTSSHTAIADIPSITQFQHLIEKAWKDGFDPPGSEFFDGKLVGKKRWIGTTEVYVILTSLGIRPNF
protein7220	59	Contig625	PHNK01000626	23	0.440	HDYAIQIAFALFCFGLNGNGAANEDSQIPDSYFDKSQYLLKAQHMQVESTLYLPFVVKP
protein7239	541	Contig7792	PHNK01007792	26	0.591	SWTVLEFLKACLYLSLLKVVPLAVRSPYLGTYLAEGELKDLATNSPRFWTGSPIVQTLSFTHTAFSSEFVFRVTPFINLTASFVSPITPSDLIRQSLPLSYLEIFVTSESVEFHDISVYTDINGLWLTDNEETSFKWNQHERAISNLAMMNLEMELIDQHLWKEEKDRILYGKVVYSTLKIDSEKVYATFAAGTDKNHTQTLFASAGQLNNNISARYRKIRSRNTRDNITDEPVLAFAHSYTQVNRHTPASTRSCLMSIGHVRDPLVQYMTTDAKLEFLKPYWMSRFASLWDMIEFHLIDYKNVLEMSKKWNKNLYNDVQEFLDGQEYGHILAISTRQIFMALEVVWDEQKPYSYSEAGLAENAMIMLKEISSNGNCQTVDVITPFLPFLIYAAPTLLP…
protein7243	433	Contig6731	PHNK01006731	22	0.825	MLHSLFSLVALSHYLISYTAADVPANAPSCVLNCARIKISEGYCSNPSTASEAFNRCLSTKPQYANGGSHVTNQNSSDMNSTTGHNNATSTPNNATGSIGSALQAAGLTRLAEAITAQNISEQALASLLQGEATLFAPDNNSPELSNVDLKAVLPLHVLPGKLDVNKLPIDNHSIVRTSLNNTSQVLLPGNDSQVLVLSRNSNGSVTIIENNKNVSTSVNATVLGNVSIYTISSVLAVPGTIAQVVSNIPSLSSLSTAISGSAPELLNQLDQTPAAASNLNATALGGVLLNHIVNGTVLYSTILANRSNEKTAGGASLSFSTNSTGTFVSSGSVTLEIVQKDIITRTGVLHLVNGLFAASSATPQLPLPNTVNKSQSEGITQLEGGNQNKNNGGGRSPN…
protein7265	80	Contig3991	PHNK01003991	16	0.361	RNPAIHFLLHYVALAQMEMNEDISTPDSYFDESQYLLQTQHMPVGSTLYLLSVRASLENDPTLNLIITLPNQEYGLNML
protein7267	710	Contig18846	PHNK01018843	38	0.763	MAPLLSRPSQWAHPSRSLWSLCTVAAAALLLSSAVHADSSNSTSAVCSFFLSMALASLDPDLIHVHQYGTVIGIDLGTTYSCVGVQKRGHVEILTNDQGNRITPSYVAFTPEGERLIGDAAKNQAPSNPTNTIFDAKRLIGRKFEDAEVQRDIRLYPFKVVKKGDKPVIQVKVNKETRTFNPEEISAMVLAKMKETAEAYLGHKVTHAVVTVPAYFNDAQRQATKDAGTIAGLNVLRIVNEPTAAAIAYGLDKKKGEHQIVVYDLGGGTFDVSLLSIDEGVFEVLATAGDTHLGGEDFDNRVIDYFTKLWKRKHDGEDITTNLRTMGKLKRDVENLKRTLSSQQSAKIEIESFFNGKDLSETLTRAKFEELNMDLFRKTMKPVEQVLKDAGVDKKNIND…
protein7320	911	Contig723	PHNK01000724	22	0.850	MLCSTLASWVLKALLFSFSLARDLPPSSPRKSVNFGPSIVRRRQGSIASALYKSTAANPEFEQLLLFNSLVKKPDSENLQNSKDGAHHASLFINHLHPYASFELTSGYLSKHSATYHAYFIQTFPLGAGKGHGKINNAVANVNINMDPSSDTFLQVVSFSESFHNVSHLQPASKPVNHHHLTSLAHKHHSSSFVHTIKNNRCQELKNKFDSAWQNALADDDLHLESEAPYTVPPQHVFGLLARSTPSHQTRDLYSFSDTELTELAECDAMNFTNPHSPEDAQASQVVDPRVALISYLTLTADEHTENLIAKRSLDQLVNSISVGHAFDLLERTSSPYHLSLYNVPGATSYASSDHEFLDHASSPTKAELGWLSVESEVNSGENELQLVWKFVYHSHQNW…
protein7335	400	Contig259	PHNK01000260	16	0.737	HWLISLTLLSLPCQAIILPHLSIHSPSIPADIQLALNPYLPSIILIIADDHLKPTFQPFFSHLNSPSNPPFLSSTDLSTSLLQLGESSENIQPIINLSSLSTPSRYLSINNNLPFKSSTLVSTFDSSHIFAGITAALDLFPLVAKLDSNDRMAIESSCIAPWGFGGALATAASVFLGASVCFFDKVDQVVDWNPTILVLSSTSVTQLVEKIDHAVHSSWLTRLSFATRLSGVNEGCLIGPLSGSSKWIFYILMIVCIYLGAITQLEANTIRAGLGASIQRVYVHPFAVGPILASHAHDFQSLFQDDSTPVHCGPPSVNVECKIVGVSEAVFENHDAIKGDLAINGASVTDEIIDGSGTLEPFNDAKLSDGFLLVGQEAQLLTNGTFRILQTFW
protein7343	129	Contig21537	PHNK01021533	22	0.862	MNQIILILWATSVTFWLAVNAQNITNHTIIVGNKAGAIFTPPVLYANLNDTVTFIFAIYNHTVTQSSFGGPCTYLREPSTEQVGFRSGFVPIPPYTQSEFMPRWTLQITTNDPIWFFCEHPGHCAA
protein7344	124	Contig70619	PHNK01070164	16	0.568	MILLFNLLLHYVALAQVEMMLLVWIEHAIGILKRRFSSLWELRIQFQKKLDIKTANHWIMTCVTLHNLLADLNNEWNNIYKEDDPEPAPDLPALDSQNILSTVIHSVIMPITLQHFSSPPF
protein7376	21	Contig112859	PHNK01111558	19	0.552	MLMFFVLMLSSLIKDSTLMLI
protein7392	82	Contig50935	PHNK01050837	22	0.604	MFTFMFLGLLLWCQRKTRDYAQVNVQNFSDSWQDGLALCALIHHHRPDLLDWDALPHSDKHACTQLAFDVAARHLGIPVRP
protein7502	301	Contig18063	PHNK01018060	22	0.695	QHELAAILLVYGLALSNLASASVATLGPYEHQHSTSVEARKAADEQINNAAHMLCRASGVFAYISQQLIPSSQSLRSSSSQSNSTSSSGLIDLTPELNLALIAWADAESLAVRRLLSKANLYSALVPGPPLPKSHPSPSLLSKLCLNIYSLYDSAYSLIKTCNTLTPIRPDFRDYVSNGRHFASGLSYKWLAIDAGELSAKYGEALGWISMARESFKKIRSCKSHTFMMVGVTKSMSSKEKSQRKNRLEQELDSLDAFTKSYEQLNRTVSFSFHFNPSYQKRYYRLKFRLENLRYQ
protein7533	103	Contig17309	PHNK01017306	14	0.433	MIAILFLKSQTLAWPAPQQQLESSQVMQAEGFPGCVGFVDGTTIPLSQNHAHDGNHYFDHKKSYSIDIQLVCDVNKNYIAFHSGCASSCHDSSVFQRMRIS
protein7582	169	Contig107479	PHNK01106287	24	0.394	MKIFAYGTLYLPLTLFLLFDSKSTVIKHLKKIMNLQPKLEYQIGVTPEWEDISHEYLLFSNVIITHSGFHNKIHTDTKDTNFLTFDHRCIIDFGLGNGIIETIWNSSKDNHQTTKAPPGLESCQDLTHFGCSFQISHKLIQRINKVMKEGKVNRFKKTLFRSKKYGD
protein7613	164	Contig115510	PHNK01114155	22	0.395	MILYTKRCMIAILSLKSQTLSWPTPEQRLESSQVMQAEGFPGCVGFVDGTTIPLSQKPAHDGNHYFDRKKRYSIAIQLVCNVNKKFIAFHSGCPGSCHDSSVFQRMRISQTPDSYFDESQYLLADSAYASGKYIIPAFRGATLENDPKTKFNYHHCPIKSTN
protein7615	105	Contig81957	PHNK01081297	22	0.913	MASLQFLLILGVLFISTLCSAHFTQSYPPPRALDIEKEDKFCGGYPVNATGRHPFPLSGSAPVIIDSHHKGAQIAVLLSTKPDPSSFADFNTSGKTNYVKPYG
protein7616	110	Contig682	PHNK01000683	25	0.376	MKNLSTRQLLHSTINAITLLLVLNYKYDSDLEDALAYLTSPDSFFKLYQLISENPIFHNHSHIKQRNPAIQLAVALCLFGSNGNGATVRRLDNLFNIGYGMWLPWIMS
protein7630	64	Contig23533	PHNK01023525	21	0.814	MEMVLLLLLIIVASPAHVMTLPLSKEWGFLKVMTHNLLNLSTSFQTQDMQVESKLNLLSMVQL
protein7653	214	Contig80356	PHNK01079725	31	0.365	MKLLLEWMVLPTWTWVKQIIFFIGDRPVEKEIVAMSGYKKRDWKLLCREMIDRWVYRKFLLQFDPVVEYLMEVEELAHENAAKDVFWSALARDVRMDVLKELSRKESMKTLSNGDQKLPALNKVKEAVEAHLKLLSVDTYQEGCAKYVSKVSEALAEEEVREKKEEKNLVQVPKQERDPMVEKLADLTKQLHIFVQEVKKVNKTPSQPRDF
protein7660	86	Contig19845	PHNK01019841	18	0.498	MILPFNLMLHYVTLVQMEMWLLIRISQTPDSYFEKSQYLFADSAYASGKYIIPASHGATLENDPKTTFNYHFPNQEYRLNMLLGF
protein7675	208	Contig106350	PHNK01105182	22	0.407	FGNQYQLWGCLFSSSTLISLAKEAFSSAQIDLCPILNYDSTIFFNIPHVIFEGSFQTSQSTQDWKADQLIQGIKTVLKTHQLQAINFMIDNEKMLKEKLDIMAQTIFDLESQHRLCLTGTPLQNRPTDLQSLIFFLRIEKWQEDWLWKNFLFPGLQKGKANSIKSINHLMKVISLRRTKDAILSLPKKIQRGISVQLADPWRSKL
protein7677	421	Contig4894	PHNK01004894	22	0.854	MLANISALVLSLILFPRLVAGLFDKQPSYNDWSDSKLKNWLQEHKISNDDKLDAHTLRELVKKNYANAYDKWSVLLFFLVPLSVLNSEKFDQYAIYRSDAELQAYIKKYSLPDPAGKPRQKLVDTIRRGYHGAVDTWADSDLKDWLEDHGLPLPPRHTHEQLLDSVKSNYYDSLQYIRNSASGTQKVFQSGIDSVINSWSDSQLRDYLLEKGIVSPSSKREELLLLVQKVYREATASATSLASSATDTAYKAAFGASQTLSGAYYAATDVPSQLYDYVSGRMDDAKDYVYSTWSDTELKEYLVGKGIIKSDAQKKRDELLSAMKDAYEGVTSDVYASWSDNRLRDWLTKHGVIKSKTAQTRDELLNLMSKSYYGARDTTYDLWNSNQLRSWLEKKGLIQ…
protein7718	90	Contig217	PHNK01000218	14	0.590	MLFLLMGLGGIQAAAVSNQASLKAAARDQSSAAVNTVASIEQLLYISTSMGLALLAAAWTFFRVSGSVFNPNVAIALLFTGALSPMSA
protein7739	130	Contig20019	PHNK01020015	18	0.763	MMLLFNLLLHYVALAQMELVLLGCPGSLYDSSFFQIMRISQSPDSYFDKFKYLLADSAYASGKYIIPAFHGATLDNDPKTTFNYHLAQSRVQIEHAIGILKGRFSSLWELRIQFQKNWRSKLKNFGS
protein7744	67	Contig14675	PHNK01014674	20	0.611	MEAVISWILCCTILHKLLADLKNQWLELYEYEQVETPPTISNTSISQTTSTQEKILPITLAHLAI
protein7749	77	Contig4195	PHNK01004195	16	0.766	MIMLFNLLLHNVALAQMEMFIAFHSGCPGSCHDSSIFKRMRISQSPDSYFDDSKYLLADSAYASGKYIIPAFHGAT
protein7754	169	Contig98944	PHNK01097932	18	0.396	YQLWGCLFSSSTLISLAKEAFSSAQIDLCPILNYDSTFFFNIPHVIFEGSFQISQSTQDWEADQLIRGIKTRAQTIFDLESQHRLCLTGTPLQNRPTDLQSLIFFLRIEKWQEDWLWKNFLFPGLQKGKANSIKSINHLMKNKGCNFVSSKKNSKGDIGSISRSMEV
protein7762	83	Contig21984	PHNK01021978	26	0.633	MTIFTYGKPYHLLILFLLFASKNSAMKLLKRIINLLPKLEYLIGFNNKIHINRNDTNYLTFGIFSYINLITGQPIPSPAKI
protein7764	558	Contig28661	PHNK01028640	23	0.720	MEINIKTIVLLVCTILVETSTANQYWRKSDLPSGYTSTTTAAPSTISGVSTTPVTNGAVPIMTQIKSDVHSAVSAFSSDISSALGDANTQSGAETAHLFQTIVKGALSYPLNQNLGSSATPSQDRLNSMSNAINKAMDSISETATKILNSTNGAIHFNDLKECISGLVQKGGLNTGESCTVNGMSITGVSNLMSNVLTTFGNGVIPTSILKETTKALDPTFTAIIPGEQQFYDSVSNAITSVQASVTGQLVAALDDAQNCFMKAASSSNDYATRLAATKSCSRSSTSKTSVYSDLKTLYLSVANQFVGYLQPNVLDSIHTIADNYLASNTTEIQHYFRDAIANSTRSIVASNAGNQVTYAYALAQCMDTVVGVDDPKSAANKAATAKCLQKPNGPAASV…
protein7807	131	Contig111717	PHNK01110445	16	0.814	MILLFNLLLHYVTLAQMEMVLLLSICKWKVHYTCFPWCNFRNDTKTTFNYHLSQLRVWIEHAIGILKGRFSSLWELRIQFQKKLEIKTANHWIMSCVILHNILADLKDEWNDLYEEEDPEPAPALASLE
protein7829	681	Contig62732	PHNK01062439	19	0.780	MWILVLVLHLPLFSTLSSHSPQDLLAYPKYAVRLTDWDLALDNSTATTLLANKSPASAKYSPDSQLVFQSSAQSFSSMPRSDYRTRIMRASSGQAFLCSVPPLPQKIFPKTTPPTSQTQPKIAVDQKQLEQEREKRRAAGLKHGLDLLEPMKNSCIYTRLGWFTYSFCYGRGEIRQFHAVTIPGHNHPHEDPAQDVYTLGFHVSHPLNPHNQARLDGSPPSPAAIAAQGELASFGRGLDGSNTNFLGLSDILREESGSDDQDVNQDFEFEQKRYLTQKWEGGTICDMTGQPRSVEVQYHCSTTGIDHIALLREVSICEYIIVIHTPRLCSEPLFLDGGGHGRLGQGDHPEEIVCQPIVDDSELATWRQAQLEAKRRETLSLDAARKAEESAAQKTEFSA…
protein7843	133	Contig3454	PHNK01003454	24	0.801	MYSFKVTISISLLLSFLLNAFHARPLKGDLHSRDFSGKATWYNTGLGACGQTDNDNESIVALSYTQYGSGSNCGKKIIIKNPENGNSVTAKVVDKCPGCEYGSLDLSPAAFKNLGKLDTGVLKVIINNQV
protein7882	207	Contig3064	PHNK01003064	19	0.879	MISPSFFTLALILSAVQAQSTSSANTNTTTTPNPNTTTSKTSSSSNSGADSPLVGTTFAAPTVNGSTCGNAQQNFNACVNKVSKDIQNCHSLDYRCLCQTYANIAQCYDGCREQQAIGASYQNQAEGYCAQAPPAPNVTVTPTPATTTNTSSSTNTTSTTNAPAPKPTILGKAPSSGSSRVGPLYFSDGLWAVCTATVFYLFL
protein7900	108	Contig80044	PHNK01079418	23	0.408	MVILYTKRCMIAILSLKSQTNAWPNPQQQLESPQVMQAKGFSGCVGFVDGTTIPLSQKPANYGNYYLDFEKRFLQNVLQYHIFHKLKFYLLCRYSYKLNVVKVILF
protein7976	303	Contig82741	PHNK01082064	28	0.396	MSSTGTPVNVIGSGVLGLTCALELAQAGYHVTIITADDSPLSIPTKKLEPPSSNSLNSFDYDPHEIQPVNDFVSPWAGAFWRSFITQKGDDPVKARIVQWDTVGFHELAKISEQDQSIVMVVALGVEFLHHRLTSIEEAFEHGPAQVVVNASGLGSCVLKGVEDPNLHPVRGQMVLVKPPKPIKVCSYAHYGNVGYYVITRPSTLEGTLGGEVALGGCYQANNSSLEVDADLKSEIIKNCLRHWPELSHISGKEEGLEIVRDVVGLRPGRHGGPRLELEKKELANSKIRMVVHCYGIA
protein7977	150	Contig82741	PHNK01082064	18	0.454	MCLFVGISAIFLELFTRRPIFQAGDEIEQLQTTFRLIGTPTPETWPTAASLPWFELVKPKFYQPSRLRETFFGATKFVRSEGGMRVAERLLNMDPSQRPSAREVLEHEAYFINELPAMEKPKDLLMNVKGEWHELESKRARKVTKRE
protein8005	364	Contig14971	PHNK01014969	16	0.596	MKFLWVLHSVILVCACLQLNDLLRPRTAGYLYLFLLFFTILSQKRIDHGELLRWTKGFGNPNVEGHDVGEMFAAALRKHNVPIKLTALINDTTGTLIASSYVDPSTKIGVIFGTGCNAAYMEKISNIPKIKHLNLPPDAEMAINCEWGAFDSHKHEHLPRTKYDIIIDESSNKPGQQAFEKMIAGLYLGEVFRLIVCEMVEEGVLFLGQNTNKIEKAYSFDTAFLSLIESDNTEELLTVTGLFTHFFCLDTTISERQFFRRLAQLIGTRSARLSACGIAAIVSKSGLLDSGCGVATDGSLYNKYPQFPERLHEALVDIFGEKGRYIKTYHAEDGSGVGSAIIAAMTKARLAEGVITNV
protein8029	414	Contig19708	PHNK01019704	25	0.808	MINLSVAPLFICSIYLLLAANTDAQSQPAQYERPQIYFGMWTDTQSPKAMNSRLGFNVSAYQFAQPIPLTTYPAPGFLLDQTDTDAALFVTVYPTYLNGVSNYHLRALGEQLCAYTTPESRPYFRYHRTSYPRTSRAVFLRFAPEMQGRWNSYGHKPYAFLRLWRRMYRTVKRVCPSVAIVWAPNTGQGYPYQQTYTDNARDFRLLDTDGDGRLTKNDDPYEPYYPGDEYVDWIGLSIYYKGPNGRNFNVPQREGYCSDVISGRTGTSDFNWYDKYCHKPGKACMIVESGAAWHASYSDDWNSRRRDARIRLQQAWWRDCITSRKLYETYPRIKLTMHFEFRKIEEDGGVRDWRDYRITSDQKMLQLFRHDLNQVRDLFVEATSRGRSRNHEINEGEYD…
protein8044	208	Contig88325	PHNK01087550	22	0.404	FGNQYQLWGCLFSSSTLISLAKEAFSSAQIDLCPILNYDSTIFFNIPHVIFEGSFQISQSTQDWKADQLIRGIKTVLKTHQLQAINFMIDNERMLKEKLDIMAQTIFDLESQHRLCLTGTSLQNRPTDLQSLIFFLRIKKWQEDWLWKNFLFPGLQKGKANSIKSINHLMKVISLRRTKDAILSLPKKIQRGILVQLADPWRSKL
protein8069	95	Contig2544	PHNK01002544	24	0.582	MKVVLYTKFCMIFILYLKSQTLSWSTPQHQLESSQVMQAECLPDCVGFVDDTTIPLSQKPAHDGIHYFDWKESFYKYLLADSAYASGKDIIPAF
protein8150	196	Contig79187	PHNK01078575	20	0.717	MLNIIYSLLSLVFITQANSELGLSPSNLCHNGISIGFIPDFDSEFTPNTPSDINQKLPQPMAIHVREMQKLQGNPVYQIAIMPPGGVDTINENLANSIGDKMKAVNDNGITVWLRFAPEFFSEPFNKPMVLAETSAGFCVNPETGIPPNGGATESSIKTTWLQSVLNKDFQKRVPSLKAILWYEVENQDQPR
protein8164	425	Contig13730	PHNK01013729	24	0.471	SSSTPFDLWFACSLLLNYGLVNSSFFRNLSTSHMSHSQSQNLMKALVRIAHEIAFDFNHLAFPISIPSNSDSSTQNMVSDQDVAASRSLGPILAALMYELCRVQKLDLDILQLFTEEFVASLFELVELTRDVEDETFNYSLIKLIKTGLNLQIALNEQFMVAGLHDSNIESTGPYIPQDSRNHTSYSSSFKIQNIVIQTMKHRLNESTTFGENLIFILNRSSHTTPEGLCVSLLILKILYLLFTTPSTHEYFYTNDLCVLVDVFIRELNDLSEESDALRHTYLRVLHPLLTQTQLRTHVYKRHEIRQVLLSHIRYAHLKDVHPTTKKLVERNLKAEWCVELERQLHSQPSSTLAPGVLFRAASCDTLGSQPCLAESPSISVVEVTKRPTLSTGAISRTV…
protein8194	150	Contig117934	PHNK01116530	30	0.548	MKHLSTRRLLHSTINAITLLLVLYYKSDSDLEDALAYMCFLSKKRYIITRGPNLYHDPRYDLASILNIPHLNFTQLFRTSPDSFFKLYQLISDHPIFHNNSHNKQRNPAIQLAVALCRFGSNGNGAAVRRLDNLFNIGYGTWLPWIMS
protein8244	151	Contig23483	PHNK01023475	30	0.458	MKHLSTRKLLHSTMNAITFLLVLYYKSDSDLEDALAYMCFLSKKRYIITRGPNLYHDPRYDLASILNIPHLNFTQLFRTSPNSFFKLYQLISEHPIFHNNSHNKQRNPAIQLAVALCRFGSNGNGAAVRRLDNLFNIGYGTWLPWIMS
protein8273	158	Contig19678	PHNK01019674	19	0.572	MASIFFSFLSWLKSLFFTKELEITIVGLQNSGKAGQFSETMVPTVGFNMRKCTKGSVTIKLWDIGGQPRFRSMWERYCRGVSAIVFTIDSADTDSFQPAKAELHALLEKPELSSIPLLILGNKNDLPGAKKVEELIEVLYRTLHINYYVAYNPFLF
protein8320	665	Contig4011	PHNK01004011	20	0.467	MAHFIFIFMSLSDINLTSLQKTLDASGLEIVENQKESLMGRKKLAEQTRDFKKISDEEKVGAFKSLLKAYQSEIDALTKRSKVSESAFLSIYKLLAEAPDPFPLLDAAVDQTAKASEAKLLEAEISRAKDENSQLKQQLAEVEKVEKELKMQQDRAERLETRMEDLVKSQVANKEAELTAAYGERISNFQDRERDLLKQVEVSRQQLADLRRSYDSNQAKLMDDSSKREFDTAARRAEIEMAEADLQRAQRRVEEVERRNERLRAEIESVRNGSESQERIKALESQISELQSEASRLLSSLESQKALADKAQKEFSKREEMLKRNSEKLESEIQNLRSKVDQYSDYDEIKRELEVMKFVEFASLNVEDEEDGFGFESSSMASSSGLAVRMPDPNAEKAN…
protein8323	350	Contig138	PHNK01000139	37	0.569	RETPFFSIPTPLLLLRSVLLSLRWLLISSFLHLSAAAATATDNNNNITFINNNINNINNINNINNNINNINHSSPSALLRPSKSLKESSNPTLPISSSASASSSSSSSSSSSSTTTTTTSTTTTTTPSTSSSTTTSTSNNNSSSTIKSVFGGLVNSMNDLLSTSQQQQKRPEVSLPYDPVHLTHVGFNSNTGEFTGLPKEWQIRLQESGISKQEQEAHPQAVKDIVAFYQDATKRDLEGPGSDNDVVWSKFTKLSQLAPTPEAKPSLPLSSHRLNQSQSFSSLKRSSFICQSSSSSSSSNNNNNNNNNNNTTTNNNNNNNNNNNNNNNNNNNTIIIINIIKIIM
protein8327	150	Contig92592	PHNK01091725	30	0.502	MKHLSTRQLLHSTMNAITLLLVLYYKSDSDLEDALAYLCFLSKKCYLIARGPNLYHDPNMISCSILNIPQLNFTQLFRTSPDSFFKLYQLISEHPIFHNNSHNKQRNPAIQLAVALCCFGSNGNGAAVRCLDNLFNIGYGMWLPWIMS
protein8330	113	Contig86207	PHNK01085471	23	0.514	CNPAIQLAVALCLFGLNGNGAAVRRLDNLFNIGYGTVIMRISQTADSYFDESQYLFADSAYVSGKYIIPAFGGATLENDPKTKFNYHLAQSRVQIEHSIFLLKGQFSSLREL
protein8411	318	Contig3154	PHNK01003051	24	0.370	STTPTTSFFVSSHGLLLFPPSHSLSTTTLSKPSNGYPLINSNIFLPSHPPDYDPYLYHSLRHQFVNNINLPSSSSFSSRDVASHNATVHLLRDRKGLDSVYYASQSQLSLASSSSSSSSSSSSHPPPQFQRMLIIPRKASSIAKNFVGNPSKLYSIPPSLDFHIPHYKRDKLAQLDSTLASAATDVVKGTSISTTITWYTGNDLLNPYCANWTPTDSSLIVAVTQQWKDRPACGEFLEIQVESKKGHPKKSVVARVVDLCGGCKPEVPHADLSKAAFTTLFNLDVGIVSGLKMRKVPPPKKWNVKLYGPKIL
protein8436	532	Contig3051	PHNK01003155	22	0.791	MRLLTLLLLAGPLAFFAFIRADTQLILSRANTLLAQGNALDALALYQEVLDRQPNDPATLYKKATALLSLGHHLLAAHDLEKLLLLADYHVAHFQLAKIYLLTADYQQALHHLHQPNDDHHQDALLLQQQVLNAQHLLSAARQAAHLNNWDLCLADADQAILLSPHAVELRLLRSNCHLALGHIAQAASDLSRASQLSPNSEIIPLRLALLSALFLAQPFSSSIAPIKKCLHSDPESKPCQKTFRLYKSIDKEISKTRNFIDSQGYRSAIKILNPKGKEEDGLIHTVQSIIQNSQVVDSKIGLSEPLIPSHLVNLHHHSLLLTNLLGYACKAYTSLNDKQLAIQFCHQVLQRDPDHIDGLVGKGEQLLDDENYDEAVNVLSLAFEKTNRSDQDILARLR…
protein8438	663	Contig40232	PHNK01040178	19	0.421	MKLLLEWMVLPTWTLVKQIIFFIGDRSVEKEIVAMSGYKKRDWKLLCREMVDRWGVRFTMVDLNKVFSEWQSYGGVVEELAHENSAKDVFWSALARDVRMDVLKELSRKELMKTLSNGDQKLPALDKVKEAVEAHLKLLAVDTYQEGCAKYVSKVSEALAEEEVRVKKEEKNLVQVPKQERDPMVEQLADLTKQLHIFFRRLRRSIRHLLSLEILIGGLHRREHWSNDCWALNRDVSEGKVEFDGRAFKFPDGSFVKPSEGQAPVDLVRRRGGLNQRRPRFEEIPDQGKSSGKEDEDGKGKGKEVNKVSFSTSFGGLELYSCGGQSSSECLAGDYDVEAGKVGRTKSSSQAQSKPNASKVDPKLSSARKRYRKEELYKMQKGMVDMGCPSFGALDVNGE…
protein8510	274	Contig66300	PHNK01065933	30	0.547	MKHLSTRRLLHSTINAITLLLVLYYKSDSDLEDALAYMCLLSKKRYIITRGPNLYHDPQYDLASILNIPHLNFTQLFRTSPDSFFKLYQLISENPIFHNNSHNKQRNPAIQLAVALCQLWLKWKWCCVRRLDNLFNIGYGTVILYTKRCMIAILSLKISQTPDSYFDESQYLLADSAYASGKYILSAFHGETSENDPKTAFNYHLAQSRVRIEHAIELRIRFQKKLEIKTANHWILTCVILHNILADLKNEWNDLYEEEDPEPPPAPPP
protein8525	185	Contig27451	PHNK01027433	24	0.892	MPILVRKFWFHLWVLLWCTWCLSFRTPQPPQFFFLDGLNLTSIMYLCTDAYRPHTLNWAQKRGLKIFHYRSNKDPAIPFPPPSLYATALSDILDRRNLPILVHCNRGQVRVGTLCGLLRLMQGWSYESAKAEWDKFLNEGANPPGAQGIWSPQPEGARDDERRGKTKNKKADGTLRMKQWL
protein8544	150	Contig117803	PHNK01116399	30	0.458	MKHLSTRKLLHSTMNAITFLLVLYYKSDSDLEDALAYMCFLSKKRYIITRGPNLYHDPRYDLASILNIPHLNFTQLFRTSPDSFFKLYQLISEHPIFHNNSHNKQRNPAIQLAVALCRFGSNGNGAAVRRLDNLFNIGYGTWLPWIMS
protein8545	91	Contig16106	PHNK01016104	25	0.419	MIHIANSVILPFKLLSHYVALVQIGFPGSFHDSSVFQRMRISQSPDSYFDKSQYLLAHSTYATGEYIIPAFCGATLENDPKTTFYYHLAQ
protein8550	654	Contig4135	PHNK01004135	21	0.502	MLNQIKKMMVLFILVTNVIHIPGRLRMPVWHNALLHHQIWFILQTKSSEIYDSKAVFDGNVVKKGWMGFPTIMYTGVVPGPLGSTSNPPEHEGVEQQSVAYTTDEGKSWIKLQGGIRGNPYHTVYSANWPEANLTGFRDPYLFTSSSFNKLLQGSSPNYQANGDYFVTISGGLRLEAHPQNGGPRLFLYRQKYMNNWAEWVYQGPILSVPAQYSFTEWRGALGINFECGSLVRLNENGRVDESANPAHVSSPYEMDIFMSGTEGGRQGNHQDHWPLWAAVNIQKAPQNDVEGAQLRANIEFSGVIDWGTAYAFTHFPLGNNRLILVGWVYEDDHQDALTRQRGYQGAFTLFRDMFVKVIKQVDSTALKPAELGSWTSHIEADRTATITTLGQSIIPETI…
protein8594	363	Contig42404	PHNK01042339	26	0.861	MFFSTFHPLFTFILAFVIPLPTAYAHGFLKHHWVNASKGWEPSQRGVDLKHSAFRGISDNTGWIGSKFVTDAAIVCGAAHTPFGKVAHPSGVIFSAASQSAGHTIPIEPGGKIKLIISGADGSGWPHHKGHVHCYLGLCGKSATDCEHFDASQTDYFKIQSEPDAIQNKLTHAYIPQLDGHLWEIVIPPSIPQGSYILRLELIVIGESVAQEGFQDQYYPFCGQIYVKEQPLHPISLDEVPKAHFPGSYAPKNLENDAIPGPPLFSAFSGNQEASGTLQHAGELYSKDDSRTHPYAAQQCAQHCLNKKIEEIGSLAPACKDSKKHCLCGTSSFVKAYHNCVKENCGVRVFLAYIVHW
protein8692	166	Contig2323	PHNK01002323	24	0.746	MIFKNGTLYLLLILFLLFDLKNSVIKLFKKIMNLQTRVGIPNWCDSEWEEIINEYLLFLNVIITHSGFHNKIHTNLNDANYLTLGIFSYINPITGQPIPSPAKIKGHGLYFPDHRCIIDFGLGNGIIKSIWNSFHNNHQTTKAPPGLESCHDFTHFGCSFQIS
protein8740	67	Contig53379	PHNK01053251	18	0.609	MILPFNLLLHYVALVQMEIFLAFHSGFPGSCHDSSVFQRMRISQSPESYFDKSQYLLADSAYASGK
protein8766	60	Contig16224	PHNK01016222	29	0.506	MLFNFLFHYVTLAQIKIVLLGFPGSCHDSSVFQRMRIFQTPDSYFDKSQYLLSDSHMQVE
protein8784	177	Contig13898	PHNK01013897	20	0.566	MYYFFIFFLLTPFFHPTHYFPPFSFEISPDTSIELSPLTQPSPSPSYPEKSPKPRSANWSPLEDKQLAKSWLHVSQKPIFGTNQTGDIWSIINTATQKLAEIFNSLEKNPPSGYNPMMWLQAAKEEYQHQSKDASFKMEDSWEVLHHAPKWNINITSHQENLLTSKPEIEDVNS
protein8793	173	Contig3767	PHNK01003767	21	0.382	MLYTKHCMISILSLNSQTLSWPTPQQQLESSQIMQAEGFPRCVGFFDDTTIPLSQNPAHNGSNYSDQKKGFSKIYSIVSQLVCDFNKKFIVFHSGFPSPCNDSSVSPRMRISQSPDSYFEESQYLLEDSAYAGGKYIISAFNGATLENDPKTTFNYHLTQSRVQIEHAIGI
protein8801	172	Contig16304	PHNK01016302	19	0.761	MILQFFFSFSWLMLFVATQDELGLCKSNLYHNDIAIGFLPALGEALSPNTADDINKKLPRPMAAHKGVLKELRGNPVYELALMPNEGLESIDKNTLFAKRYDKSMVLSETGASYTRDLKTGEPAPGGASEFSIKSTWLRSVLSASLKEKVPNLKAILWVRIFRFIININ
protein8824	74	Contig1377	PHNK01001377	23	0.563	MGLFQFLIVVLHIIRYINISSSLILGGCKLDFQSNNMRIFLIWNSNFYCTIQTTELDITSTVSSSFVRGNVGN
protein8827	150	Contig41059	PHNK01041001	26	0.732	MKIFAYGRPYHLLILFLLFILKDSAIKHPKIIMKLLQKLEYQIGFHNKIHTNTNDANFLTLGIFSYINPLTGQPIPSPSKVKGHGLYFPDHKCIIDFGLVNGIIKYIWNSSQDNNQTTKAPPGLESCQDFTHFGCSFQITTQYRGWTC
protein8854	149	Contig56376	PHNK01056202	24	0.774	MLQVTVFKLVLLVACVLIDRAVSITFGRSRGIGEMGIKCGTIIPRPDKMKASSLDDCIRALEFFKSPKNPQFLLPTGLREYHSFGSCEVRLLHERGPVEIEHKSVIEKVKNIAERCHVAVSLDISSYLCKCILNIIFVISERQGYVD
protein8864	396	Contig20078	PHNK01020074	21	0.665	IVHLLPAFILVALAPWNSYSAHIGISKRQTHLEESNRVRIDSGICEKTPGVKTLSGYIDIGEDKSSFFWFFEARNAPENAPFTLWMNGGPGCSSMIAIFQENGPCSVTEDGQDTKNNSYSWNTYVPIGAGFSYGSNNVSTSPEAAPQIWKFLQILFSRDSFAKYKSRELGVWSESYGGHYLPVLIEVSLVAILLYYTLCIKDSFFLGFSAQFIQAQNAKISSGALQGEELVIIVMGIHLSSYNFTQAKYNGKLDTIDAKMRERMKKNLFGRGGCQELLQKCYRTDKDVDCSVAEMICTQAALLAAGKQDPYYTWYIQSNYIKYLQNAEVRSQIGAQNDYVECSDDVSGVFRSKGDDSRSSAPSVARLLDKGLPTFIWVGVSSLIFETYV
protein8904	211	Contig4225	PHNK01004225	22	0.404	FGNQYQLWGCLFSSSTLISLAKEAFSSAQIDLCPILNYDSTIFFNIPHVIFEGSFQISQSTQDWKADQLIRGIKTVLKTHQLQAINFMIDNERMLKEKLDIMAQTIFDLESQHRLCLTGTPLQNRPTDLQSLIFFLRIEKWQEDWLWKNFLFPGLQKGKANSIKSINHLMKVISLHITKDAILPLLKKIQRGISVQLADPWRSYIKF
protein8931	159	Contig18729	PHNK01018726	28	0.664	MFQNLRLVSFVLAAQLLLAPAILRVQSQSVIPSSAKPSPPSAVVNPSSVQANPSSSGVTTSSNGGNTLSSATNTVSSGGSSESFNPVAGKSVEEYQCTELMWKFDSNSTKTSSNCTLTWTNYEDQILVTNVTVPNVNCSGGYILTPTVDVKSSGQQK
protein8933	183	Contig2431	PHNK01002431	23	0.721	MFLLSSPSLLVAILALTQNAYSISPLFRTQTSSVISTPRNIHTSTLWSFDDCGLPSDAIIIEDFSLKPDPPVPGKNLTITATGTVNQRIEDGAYSDVVVKLGSFIKLLQKRFDVCDELRKANATLQCPIEPGHYTMVQTVSLPREIPKAKFTVEARAYTQDDDDMACANIMIDFLAHGHH
protein8950	98	Contig18660	PHNK01018657	19	0.521	SIFFSSTSLLLLSRYLYANHQAAKRDLIHPGLSFSSLSFLDCLSPSLLLDSFLVWRMYDGSIVEYPSHQPKLAYLLTQATDGSEMPRVLRLFFFFF
protein9050	150	Contig57175	PHNK01056986	24	0.719	MLQVTAFKLVLLVACVLIDKTISTTFGRSRGIGEMGINCGIIMPGSENKKPSSSEDCIRALELYRDSENPQFLLPTGLYEFRSFGSCEVRLLHERGKEEVDYQSVIKKVKNITEACQVAVSLHISSHLCRCIQIIIFVISERQGDVDR
protein9122	151	Contig92952	PHNK01092079	30	0.445	MKHLSTRNLLHSTMNAITFLLVLYYKSDSDLEDALAYMCFLSKKRYIITRGPNLYHDPRYDLASILNIPHLNFTQLFRTSPDSFFKLYQLISDHPIFHNNSHNKQRNPAIQLAVALCRFGSNGNGAAVRRLDNLFNIGYGTWLPWIMS
protein9182	91	Contig109222	PHNK01107990	22	0.913	MASLQFLLILGVLFISTLCSAHFTQSYPPPRALDIEKEDKFCGGYPVNATGRHPFPLSGSAPVIIDSHHKGAQIAVLLEHQTRPIVICRF
protein9184	334	Contig6413	PHNK01006413	21	0.456	MSVKVKLLCVIGDILATIKAAGFASHSETQFYTWCMSKLNEIPSLECGRKRLKNEVINISRKSRDARSQNTRDKLLKKSGYWNPAQHVVLGVMHNWLEGVLHFHLRHYWKFKSEPRYITRKRSQQQDLRKAMKWAQIESNIEIMVLDSRSDTNDNDDDDSDDYEDLQLQSGKDGQFFTQCNIEKFQALMKGVVLPSNLAKVPPNLGEERHRKLSASQWYSLFAYVIPLVIFELFVKEVNNLPQGSNQLRFLYNTGHLVMCTHIVCSRSLDRHLINRFETQYKKYNSTIEKLFPGSKVQPNHHFAVHMPEQMEYWGPPIGAEYNNDEKRL
protein9185	67	Contig6413	PHNK01006413	22	0.459	MKMKLCNITIQFLLLLDQKYFQELSYLSTTSYFLSKSPTIVSCGKTNQEIFNMASLSKYTNSKTT
protein9306	132	Contig15709	PHNK01015707	64	0.420	NSHNKQCHPAFQLAVVLCCFGSNGKGAAVRCLDNLLTIEYGTIILYTKHCMISILSLKSQTLAFPNPQQQLKSSQVMQAEGFPSCEGFVDGTTILLSQNPAHYSNHYFDCKKKNVASLDHVMTLLSSKE
protein9331	168	Contig117674	PHNK01116271	17	0.515	MNAFILLLVLYYNTDSYLEDYLAYMHFICKKCYINPRGPNPHHDPRYYLCSILNIPQLNFTQLFQTSPNSFFKIYQLISKHPIFHTNSQNKKCDPAIQFAVALCCFGLNGNGTAVRHLENLLTIGYEMYLHADSAYASGEYIITAFCGATLENDTKTTFNYHLAQ
protein9384	217	Contig16891	PHNK01016888	18	0.894	MITLLTLLALSVYLSLAIKFDLPAHHSPSPQCTWYYAMADTLVIVSANISPAEFQSIDLQIIDGSIHKNVYQSKKNIHGETRIAITTHADADLGVCFSNTLQPYAKPSDQPFQSSIDLDVDIGAQAVDYNAIAKAESLSGLEVEMRKLEGIVSEIVEELNYLKRREMKMRDTNESTNERVKLFSLITVITLISSGTWQIWYLRRFFKRKNLIE
protein9404	134	Contig13077	PHNK01013076	19	0.622	MHLLGVINVLLFKSIVQSLSTHRTNFEMRGKHGDSSRSIDPNSTDWVTPMSQSIMADNTKQRYVFAHVVQGNSQFYTRKNWLADMSTAQKYGIDAFSINIGVDSTNEKQLPLIYDAAKSIGFKVFICKNSE
protein9414	70	Contig47227	PHNK01047143	23	0.620	MVILYTKHFMIAILSLKSQTLAWLTPQQQLESSQVMQAEGFPGCVGFVDGTTIPLSQKPAYDGKHYFD
protein9422	156	Contig12709	PHNK01012708	17	0.444	MLDQTTFSQLINNVLALCLAEGMAICPWGAMGSGKFQTRKQVEEREARGEQTRSYITQGQSELEIKASAVLEKIATEHQIDNITSVALAYVMSKFPYVFPLIGGRKIEHLKSNVDSLYINLSKEQIKELDELSDFKLGFPYDMVNGEITSYLS
protein9444	120	Contig1149	PHNK01001150	24	0.383	FSGLLRNVSLNCFILLRITPSFTIILKSHNVIHQFNWPSHYVVWVPMNANLKKEPGTFFDEDQYLLADFSLCEWKICTSCICGAASEDSQNAKFNNHLAKSRVRIEHSIGNLERLFFQF
protein9467	69	Contig37908	PHNK01037864	18	0.562	MGWFMGHILSKVFLGFCEWGFRPRWNHFNGLATLFFEWPILKNSFVFRNTSFKIIFYIQSSIWSSEL
protein9476	247	Contig565	PHNK01000566	43	0.809	MRSSSPFPLYSSSSSACCCLFTSLSLALLLALTLPLFPCTDAQHDMSTNVTYLEGTWSSGSGGVVTGSGFANPVNFSFTYPKTAGISMSFTNDGFWEEAQYRFISNPAKPACVRAVMIFQHGRYTLENNGSITMQPIKADGRIQVQDLCAAQTSTISYYYQPGLYFGWNIFNDLHHNTYNLQLQAFDQALFPRLYLVARPPNMLPVTQLTQNSTKSKMKRSIDTEDPARSRSWKRWLLSWVS
protein9524	222	Contig329	PHNK01000330	26	0.849	MSNFYLSLTALLQVLVLSFWASSAAITIPGLNSVADFQIVLKSSTILNLRARQAPESYDSESSQPTDVSFIPCPDTATQGYVQNFAISPCDRVSDSSSCTFSYGKNYTILIDFISYINAENPRSSLQAFDGDGSYAYSGQSFSACKSIKYVALNFDQTFNLYLNLKYGPCPIVALANSTYTYKFVTLKSPFDRLQYNITSGFTGPSIFCAAVDITFQP
protein9530	162	Contig88325	PHNK01087550	22	0.404	FGNQYQLWGCLFSSSTLISLAKEAFSSAQIDLCPILNYDSTIFFNIPHVIFEGSFQISQSTQDWKADQLIRGIKTVLKTHQLQAINFMIDNERMLKEKLDIMAQTIFDLESQHRLCLTGTSLQNRPTDLQSLIFFLRIEKVARRLVMEEFPFSRFAKRKG
protein9580	168	Contig17838	PHNK01017835	17	0.764	MVLLLLLFIVAAPAHFMTPLSSKEYGFLKVLTNTLMNLSTSLQTHNMQVEKNYPKTTFNYHLAQSRVQIEHAIGTLKGIFSSLQELRIQFQKKMEIKTANHWIMTCIILHNILADLKDEWNDLYEEEDSTPPPALPSRESQNIHSTVICSVIIPITLHHFDTQPF
protein9592	136	Contig16555	PHNK01016552	27	0.699	SRGLSQDVLVLLIVLLFPLSQKTTQGGKNYFDHKKRYSISVQLICDINKKFISFFAGYPGSCHDSYVFQRIQISKEPEKFFDEDQYLLADSAYVNGEYLLPVFWGAASEDSQNANFKNHLENSRVHIEHSIES
protein9594	109	Contig19222	PHNK01019218	26	0.556	MLYVNLIYFAVTSLIFSFCFRTSKSYEMLKGCTPFAHENDKIMWKKILHEDFCYIDEEEDKEYNEDAKSLITGLNQPMKLQLLKKDPSYRITGRNIKDQPFFDEVNWD
protein9601	237	Contig95489	PHNK01094562	18	0.609	MILPFNFLLHYVALVHMEMVLLLKHLLGQLHNSNLNPLKKCKAKGFPGCVGFIDGTTIPLSQKPAHDGNHYFDCKKRFLQNVLQFLIFHKLTFYLLCRYSIAVQLFCNVNKKFIFFHSGCPGSCHDSSIFQRMKISQSPDSYFDKSQYLLADSAYAGRKYITPAFHVENLENDPKTTFNYHLAQSRVWIEHAIEILRGRFSSLRELSIQFQKKWKQNCKSLDNELCYTRQHPS
protein9761	76	Contig108419	PHNK01107205	16	0.802	VILLFNLLLHYVALAQFEWVLLGCPGSCHNSSVFQRMRISKSFDSYFDKSQYLLSNSAYESGKYIIPAFHGATL
protein9831	170	Contig1035	PHNK01001036	25	0.478	MIPITNSLILPFNLLSHYVTLVQMEMVLLGCPGSFHDSSIFQIMNISQILTNTLTNLSTSFQTQHMQVESTLYLLSMIEHAIEILKGGFSSLRELRIQFQKKMEIKTSNHWIMTCVILHNILADLKDEWNDLYEEEDPEPAPTLPSLELQNIHSTGIRSVIMPIPSNI
protein9844	59	Contig107775	PHNK01106576	23	0.667	MKLLLEWMVLLTWTWSSRLSSSLVIGQWRRRLWPCLATRRGIGSYCAGRWWIDKVSGSL
protein9864	60	Contig25337	PHNK01025325	16	0.763	MILLFNLLLQSVTLAQMEMALLMRNFQSPDSYFDKSKYLLADSAYKVESTLYLLSVVQL
protein9901	73	Contig30110	PHNK01030083	37	0.511	MSLWLKWKWCCRFLNPLTHTLMNLSTSLQTQHYASGKYIIPAFRGANSENDPKKLNLIITLHNQEYELNML
protein9921	101	Contig508	PHNK01000509	20	0.837	MSHSILFLIISLVTKLATANISATTPTSGSVCNVGQACPIQWIESKDSPDLDDLGPTQVDLVQGDPTNLQVVQSLGKVEDPENQKQMTFIPDNNLPTGSD
protein9955	70	Contig16652	PHNK01016649	20	0.414	MSSSTAITILVTVPLAVEDEEIEDEEEEGQEHAVPSEDGEKLHGSMRLVFWLPAMFDICATTDLLDHF
protein10065	89	Contig20886	PHNK01020882	16	0.868	MILLFNLLLHYVVLAQMEMVLLGCPGSCHEPSIFQRMRISQIPYSYFNESQYLLSGSAYASQKYIIPVFCGATLENDPKTTFNYHLS
protein10066	185	Contig74824	PHNK01074295	24	0.374	MTDAIRTFKLLGCELLFCTNAAGSLRPEVGAGSLVALKDHINTMPGTPMVGLNDDRFGERFFSLANAYDAEYRALLQKVAKEEGFPLTEGVFVSYPGPNFETAAEIRMMQIIGGDVVGMSVVPEVISARHCDLKVVAVSAITNMAEGLSDVKLSHAQTLAAAELSKQNFINLICGFLRKIA
protein10152	361	Contig27570	PHNK01027550	25	0.805	MSFKQNLLLSYCLIIASLVGLTSSCTGKSNHGRSSPSEKKETLDYQDVYNDVADVLSESSYDHGSYAPIIMRMAWHSSATYDIVTDTGGSNGATMRFCPEKNYPPNIGMENARNRLEPIYQKYSAAGLTYSDLWTLAGVCAIQETGGPKVPWRGGRKDRQAKDSPPDGRIPNPRNGADHLRKVFYRMTFNDQVYLFIFFKLLVQIVALSGGHTLGRCHLARSGFDGSWTFTPNNFTNAYFKLLQEEHWELKKWKGAPQYEDERTKSLLMLPTDIALIEDRIFKYWVKRYAENQDVFFQDFSFAYSKLLELGVPVKNFQTNNHVAFKTMAEQNMVPCPDYNYTSLVQKDTSACAHS
protein10196	284	Contig74254	PHNK01073735	30	0.432	MKHLSTRKLLHSTMNAITFLLALYYKSDSDLEDALAYMCFLSKKRYIITRGPNLYHDPRYDLASILNIPHLNFTQLFRTSLNSFFKLYQLISEHPIFHNNSHNKQRNPAIQLAVALCRFGSNGNGAAVRHLDNLFNIGYGTYLLADSAYASGKYIIPAFCGATSENDPKTAFNYHLAQSRVQIEHAIGILKGRFSSLWELRIQFQKKLEIKTANHWILTCVILHNILADLKDEWNDLYEEEDPEPPLALPSLDSQIIQSTGIRSIIMPITLQHFTLQCF
protein10199	388	Contig20023	PHNK01020019	24	0.452	MTLSPLSINLLLKLISIINPIISISPIHHNTLPSTPCIVQNIQMRALIVTQDASIIIGKGGRHINEIREKSGARATISEAVPGNPERILGVGGPLDAVSKAFGLIVRRINDEPFDIPSVPGSRAVTIRFVIPNSRMGSVIGKSGTKIKEIQDMSGARVQASESMLPGSTERILSVSGVADAVHIAVYYIGMILVENQDRMSGGNTSYKPGGSTTNGTSSSGVNPGTRGANGGVVGSLGGNSYGNNLYGTSTGTSPQSFHHHHHLHHTGSHPSQHHHHSSSLSSAAAYPSTANQPGSQTQQLYIPNEYVGAVIGKGGQKINEIRQLSGTHIKIMEPGEGGQSTTANERLVTITGQPMNIQMAVTMLYQRLEAEKQKRMFPIL
protein10259	107	Contig20975	PHNK01020971	24	0.394	MKIFAYGTLYLPLTLFLLFDSKSTVIKHLKKIMNLQPKLEYRIGVTPNGKISATEYLLFSNVIITHSGFHNKIHTDTKDTNFLTFGIFSYIKPITGQPIPSPAKIK
protein10268	193	Contig25692	PHNK01025678	23	0.505	MVILYTKCCIISILSLNSQTLSWPTPQWQLESSQVMQAEGFPGFVGFVNGTNIPLSQKPAYYGNHYFDCKKRYSIAVQLLYNENKKLITFHSGCPGSCHHSSVFQRMRISQSLDSYFDNSQYLLADSAYASGKYIIPAFCGATLKNDPKTTFNYHLSQSRVLIEHAIGILKGRFSSLHELRVQFQKEWK
protein10273	217	Contig10737	PHNK01010737	21	0.894	MISLNAIFFLVCFLAHLAVANISPTFPVTGSSCACSQPCQIKWIDSSATPSTSTLGETAIELVQGDPAALQTVQLIGGVSNPSQATAYTFTPNQSLVSDKNYMFPILRTTRVLIMFGNALGGTVRKVIGSSSPSTTSSVSQSTSTNSTGNSPVNTTSPMTSATKNTSATVLSTNSSSNSTSGNKKDSESNTAANSALSVTVLALSFFAAITLF
protein10291	277	Contig38775	PHNK01038727	17	0.449	LAYFLFFLLSKYSLNSFLHLEPKPSLDPKSFQPFPLISKKIVSPNTSIYRFALKSSKHVLGLPIGQHIAVQAHINGKNIQRSYTPITSDDDKGYFELLIKSYEQGNISKYISKMAIGDKLLVKGPSGQMKYTPHLCNEIGMIAGGTGITPMLQIIRAMVKNPLDTTKIYLIYANVNESDILLRSELETIAKEHPNRFTLYHCLNNPPEKWTQGVGFVSKEMIETHMPKPSPDIKILLCGPPPMLNAMKGHLAELNYEKPRTVSKIIDQVFCF
protein10294	254	Contig80952	PHNK01080309	25	0.797	MSSLGSQLFWLALAASSLPYLVYAGLEAATHSTTLDNNNFDSLIKVPSVASMLLGAVVASLFENDKNCRVAHLDANAEPNRDLSSRFGVSGFPTIKFLPSAEGAEPIDYNSGRTDSAILDFLNEKCGSFRALEGGLLPEAGRNSTLDPLVVDLVGGKKEVVTTIEELAGTYEGNQYYVKVAKKWVQDPQWVEKELARLEKVGQNKAVAGPKLDEVHIKRNILRVFVSGPDAMKSKKDEEPEVGKATGEL
protein10311	186	Contig19076	PHNK01019072	26	0.371	PAAPFPIPSNPQLSLLPLLTSLVRSVSPKGQQLSHHQGLRNLLISSTIRSAFKNVDTCKYHTSSEDHHSWYILMVIKLLADLRCSIGSISSISEVSKGYYHDWAQLRKDGAKLWTGPPSLIKEEVRTRSSSYRALYFPNIQGITLANKKATHTTDAFQNRVTLVAIESNRMSEVYISFITTS
protein10315	114	Contig3032	PHNK01003032	16	0.815	MILLFNLLFHYFALAQMEMVLLGFPSSCHDSSIFQRIRISQTPDSYFDESQYLLSDSAYASGKYIIPAFCGATIENDPKTTFNYHLSQSRVQIEHDIRILKRIFSSLRELRI
protein10382	297	Contig7941	PHNK01007941	30	0.467	MKHLSTRKLLHSTMNAITFLLVLYYKSDSDLEDALAYMCFIFKKRYIITRGPNLYNDPDMIWPHSQHSSFKLHTTFRTSPDFFFKLYQLISDHPIFHNNSHNKQRNPAIQLAVALCCFGSNGNGAGVRRLDNLFNIGYGTNEDFQSPDSYFDESQYLLADSAYASGKYIIPAFCGANSENDPKTKFNYHLAQSRVQIEHAIGILKGQFSSLWELRIQFQKKLKIKTANHWILTCVILHNILADLKDEWNDLYEEDDPEPPLALPSLDSQIIQSTGIRPIIMPITLQHFSSPF
protein10470	124	Contig7105	PHNK01007105	16	0.802	MILLFNLLLHYVALAQIGFPSSCLDSSIFQRMRISHTPDSYFDESQYLLADSSYASGKYIILAFCGATIENDPKTTFNYHLAQKEYRLNMLLGFYSEDFLVSGSSESNFKKKWKSKLQIIG
protein10479	495	Contig3811	PHNK01003811	25	0.467	MFSQFFRMIMPLICLSYFFIRVFADTASLRSQLSSAKVEALFPGDAKYPEFAEPFNKRFEQIAPAVLVFPKNPSEVSKCVVIAAQEGLHVSPKSGGHSYTAHGLGQIIHSYCARGVSGAFVIDLGRLNQVRLNTSTKIATVGSGSRLGDVALALNEQGGVGIPHGTCPYVGIGGHSAFGGFWGLTSDNIVRHEIVLANGTVTYTSDSSNPDLFWALRGAGAFFGVVTAVTFQTQVAPHNCVNFEYNWDLSSTELAEALMSYQTFCLRKDIPAELGVEVNLGKGSNDGKISFNLVGTYYGSDKKFQEVIKKILLRLPPLNHKQVTSTGWIGSLQASAEGQNLSSSGVNLLAEHDTFYAKSITTPEEQPIKDATFEGFSKYISRKGWETSTDWFVQFLLYG…
protein10494	209	Contig106350	PHNK01105182	22	0.404	FGNQYQLWGCLFSSSTLISLAKEAFSSAQIDLCPILNYDSTIFFNIPHVIFEGSFQISQSTQDWKADQLIRGIKTVLKTHQLQAINFMIDNERMLKEKLDIMAQTIFDLESQHRLCLTGTPLQNRPTDLQSLIFFLRIEKWQEDWLWKNFLFPGLQKGKANSIKSINHLMKVISLRRTKDAILSLPKKIQRGILVQLADPWRSKL
protein10505	109	Contig24904	PHNK01024893	22	0.438	MLTRLSLYGIVPLRFFWAVGITPPEMISKQPLFPGDSEIDEIFRIFRLLGTPNESSWPGVQSLPDYKLTFPQWQPKNIKDQVQGSTPTSVDLIAFMIQLGELQPSLL
protein10527	147	Contig9504	PHNK01009504	23	0.595	MKNLSFFYRLLFTTFLYTGYHCQQNSTTAPHSSFRVGGYYPAYNASVQPTSQLNYATTTPNFEVGFDEVSEKEWDRLAPDFVSRCKKAGVNPHYTIGGFTGSRYFSPLVATTQNRTQFATSLINFAKKYGFAGVDIDWECKLEL
protein10568	109	Contig11235	PHNK01011234	24	0.753	MLQVTVIKLVLLVACVLIDNAVSVTFGRSRGIGEMGTKCRTADSTTDKMKPSSPEDCIRAYQSVVDKVKNVTETCKVAVSLHVSSHLCRCILIIFFVMSERPGDVDWE
protein10640	650	Contig80155	PHNK01079528	23	0.393	MDNSRWGIAPLGNLLLLHDSSGLSSPPPRATLGRLSRLPDEILSMVFAHLNAHDLFIGRAVCRAFYAWCVTVDSFWKALVLEKLRVGDEDVSSRRGGSENENGGRIGSHHGDQEDEDQNILLPPWRGSWRETYLHHFLFSMGRKVVDQRTEDQNGFTTDFGTGRDDETKKMNGVEQHNQAEEKDRDEEIKKKTCTLNENGIGKETTTSKEENLKPSNFKKSEQICCRGVYSDILFHSVVCCRYSFQSLCPKLDFSLKKVDFETFDRVREGKGRRGDEWRIVTKSGDKNEEELSSYCWDRSQPLIIKNLVNNWPALHSWRLPSLLTRFPNTLFSAEAFKVTLPNYIRYHDSCGLDESPVYLFDPKFAENTCGEEEGLGLGEEFSVPELFEEDLFDCLGND…
protein10661	151	Contig12495	PHNK01012494	30	0.464	MKHLSTRKLLHSTMNAITFLLVLYYKSDSDLEDALAYMCFLSKKCYIITRGPNLYHDPRYDLASILNIPHLNFTQLFRTSPNSFFKLYQLISNHPIFHNNSHNKQRNPAIQLAVALCRFGSNGNGAAVRRLDNLFNIGYGTWLPWLMS
protein10668	64	Contig10964	PHNK01010964	51	0.368	MLILYTKRCMISILSLKSQTLAWLTPQKQLESSQVMQAEVFLQCVGFVDGTTIPLSQKPSHD
protein10699	115	Contig62515	PHNK01062226	20	0.881	MVLLLLLFMVASLAHYLVADSAYASGNYIIPAFCGANLKNDPKAIFNYHLSQSRVQIEDAISILKGRFSSLWELRIKFQKKLEIKTANHWIMTCITINNILSDLKDEGNDLYE
protein10725	93	Contig1450	PHNK01001450	24	0.389	MTLRKKLMMIMKIKVIMVEVSELSEDDCTYSEEEDLSEEESESYEDNDENQLTSNGVEDVEMFDPRAIKKEPEDENNFRMGLHGVFSDNWS
protein10775	94	Contig2147	PHNK01002147	24	0.789	MLQVTVFKLVLLVACFFIDKAVSITFGRSRGIGEMGTKCRTANSTLDTMKPSSQEDCIRALDFFKLSKEPQFLVRTGLWEYQSFGSCEVNFY
protein10807	70	Contig17941	PHNK01017938	26	0.571	SALFNFQALLRLLLLVICTAAYLRATVPSLIDRNKEGVLGLLWKCARIGERLSVYVSLACMAMAAVTCE
protein10968	138	Contig46032	PHNK01045951	24	0.500	MKIFAYGTLYLPLTLFLLFDSKSSVIKHLKKIMNLQPKLEYQLVIHIDRNANFLTFGIFSYQSNNWPTIPSPAKIKGHGLYFPDHWCIIDFGLEMVSSKLFGILLRIIIKRPKLLLVWNPVKISHILVAHFKSVIS
protein10990	262	Contig23482	PHNK01023474	25	0.513	MGWNNPVLMIGLFSILIHNPKVLEFDNKCNYFRTFQLNVYQPHVFEDSFHNLAWKTGDEIKYVKISIWFYNEGVDADAVTRKWLEAYFTLGFYKHLLGVPVVLSDLDSIDPDMFENNIDGIFELIFSVEAGDSSSVRIVDLKPDGQNIPVTNENKVECVQVVVENFFTLSIHYQIDAFKKGFNEIIPRELNCINFNKAILLSLGFGNLSCNLTKKKELNCYSSLLEVSGFIWRVLVLYNVLKGPQSLPSYDTYEGLR
protein10997	136	Contig29901	PHNK01029875	30	0.468	MKHLSTRKLLHSTMNAITFLLVLYYKSDSDLEDALAYMCFLSKKCYIITRGPNLYHDPQYDLASILNIPHLNFTQLFRTSPDSFFKLYQLISNHPIFHNNSHNKQRNPAIQLAVALCRFGSNGNSAAWLPWLMS
protein11003	374	Contig61681	PHNK01061404	16	0.527	MCSSPLISLLSPSLAQSLALSLISAARESDIRALHLILQHPELPSPSLQDDDGWTALHHAAEVGSLDAVTTLLQAGALCTITDQLGQTPGDVAFSLNYVDIYQSMLDEGFRAELLRLAIGATNPSSTPTGLPESDNDTFLNSKISYSVSSTGQPLCMDDHGNAVMLGWEHHIMSKTAQALFGRHNPSTHSTLSALNVGFGLGLVDTEFQKFHPAHHVIIEAHPDVLRYMKQQGWYNKPGVEIFEGRWQDYLQSLESNPAKTTEFDIIYWDTFSEDYSSFKTWLNALFGLLRSPESCFSWFHGFGATSRLIYDLYTLITEMDLRDAGFKAKWFEVAVPDGGEAVWEGVKRRYWDIPCPYRLPVAMMDV
protein11018	107	Contig53709	PHNK01053577	24	0.506	MKIFAYGTLYLPLTLFLLFDSKSTVIKHLKKNHELATKVGIPNWCDSEWEDISHEYLLFSNVIITHSGFHNKIHTDTKDTNFLTFGIFSYIKPITGQPIPSPAKIK
protein11043	49	Contig5710	PHNK01005710	19	0.460	MFPGLGIAIVAFTAYVVVDNLSHPSSDSVKKLKQETLKRDSLVEALTK
protein11065	65	Contig13544	PHNK01013543	20	0.434	MVLISSFILSTYGLDSILCTQTQDFLFTHKKFNVQKLIEFLPSPTLTGMAACTLKLKYEAQDE
protein11075	216	Contig78242	PHNK01077646	30	0.562	MKHLSTRRLLHSTINAITLLLVLYFKSDSDLEDALGYIVTSSPGAQIFIMIPDMIWPPFSTFLIQTSPKFLELLPILYSNFINSSLIILSFITVSITNRVILPSNLLLHYVTLAQMETVLLMRISQTLDSYFEKSQYLLADSAYASGKYIIPAFRGITLENDPKASFNYHLSQSRVQIEHAIADLKDEWNDLYEEEDPEPAPALICFARWDS
protein11144	181	Contig5469	PHNK01005469	27	0.718	MPSFSIFLHPLFTLLLTFPSLLYVHSISSLNPKNLPHTTQKGQFGYNDCGTSSSQTSNCQTMYVNSLEDFCLWGSPTPNQTIGNIEDKVVAYCTKPDRGTRVFPPGSIKSAHFLKTPRYVQITGSLSGPAIGIQQGDEGGELDPHGAEQVGNPIGGLIFSTAFGKGIVQVKEWMKSTM
protein11172	73	Contig6327	PHNK01006327	16	0.397	MTPIIYFLLLWEAASEDNQNAKFNNHLATSRFKGIKNVLLEIGLKMETVINWILCYITLHNLYLFTSKING
protein11173	201	Contig89578	PHNK01088776	22	0.404	FGNQYQLWGCLFSSSTLISLAKEAFSSAQIDLCPILNYDSTIFFNIPHVIFEGSFQISQSTQDWKADQLIRGIKTVLKTHQLQAINFMIDNERMAQTIFDLESQHRLCLTGTPLQNRPTDLQSLIFFLRIEKWQEDWLWKNFLFPGLQKGKANSIKSINHLMKVISLRRTKDAILSLPKKIQRGISVQLADPWRSKL
protein11200	282	Contig838	PHNK01000839	24	0.691	MKLRTRIFVGVAISIALSYSASGSPTANTFEVVGTTGVSAQQFFVGGLNKIYILDKVENNPTRIAGTNKPAWATEYDIRRGSVLGNGTWLSAGGNKAVTWGGLDGTNLAGPYYNDDGAKSIRLLDPCDNDENCQWVVNPGGALMQAKRWYPTIETVEDGSAIIIGGCTDGGYVNDAGQNIPTIEYFPSKGPAVGLNILTTTLPANLYTLTWLLPSGNLFLQTNLGTEIFDYKKGVEYPLPNMPHAVRTYPASAATAMLPLTPMNNVCFYVFMNKDPF
protein11221	209	Contig106350	PHNK01105182	22	0.404	FGNQYQLWGCLFSSSTLISLAKEAFSSAQIDLCPILNYDSTIFFNIPHVIFEGSFQISQSTQDWKADQLIRGIKTVLKTHQLQAINFMIDNERMLKEKLDIMAQTIFDLESQHRLCLTGTPLQNRPTDLQSLIFFLRIEKWQEDWLWKNFLFPGLQKGKANSIKSINHLMKVISLRRTKDAILSLPKKIQRGISVQLADPWRSKL
protein11232	656	Contig910	PHNK01000911	24	0.698	MLNSFQLKPFLFIAFVFFQISLCSYGPKYVTCPDESLIRNAGTVEAQNQTLSSGEKIYLAKRRSEVSLGAFKQYLKNVEKSITHPSSGLNLLSPLLSLDNLKVPDYAYKMASNSKDLPHIAFAISGGGYRAALFGAGVLDTFDCKNPVAVKKGTGGLLQVIKLHLIYIMNNEFMDGLDYISGLSGGSWLVTSLALSNFPRIYNLVLGTQSLNGWITNYDILGSSTGGEGINFEFLLKVFGAVQEKIDAGFDVTMADLWGIALGYHFTGSTGMDNYYDSSPHGSDISFSNIQNLATFQNGLQPYPIITATTISPNQNKSMVNFGGLIPLSNNQYEFTPHEVGSWDPNLSSFIPTSYLGTKMKNGVPINQAKCVNGFDRACFLIATSSCIFPSLNTSDSYM…
protein11255	141	Contig105680	PHNK01104530	18	0.395	MILPSNLLMHYVSLAQMETVLLGFLGSCHDSSVYQRMRICQTPDSYFDESQCLLSDSAYASGKYIIPAFCSATLENDPKTKFNYHLAQSRVRIEHAIGILKGQFSSLWELRIQFLKKIGDQNCESLDHDLHYTPQYTS
protein11268	73	Contig24019	PHNK01024011	22	0.573	MKSLILLPILMIFMPLLKKKASFYLLNAPLVSPPPISYNVSSQVIVKESMMLNLKNWVCLNCVALNPSYMT
protein11274	81	Contig1967	PHNK01001967	26	0.418	MVLNGQNFIKLLTGIQLSMCHLASCITGMKDKNDGYQDVLQMFQKQKRGLNNDGNYSSKKRMLIKSEVDNDDANSDCEN
protein11293	140	Contig12495	PHNK01012494	27	0.603	MIWPPFSTFLILTSPNFLELLPILSSNFINSSLNILSFITIPITNSVILPSNLLLHYVALAQMETVLLGCPGSCHDSSIFQRMRISQTPDSYFDKSQYLLADSAYASGKYIIPAFRGATLENDPKTKFNYHLAQSRV
protein11299	190	Contig45755	PHNK01045677	22	0.689	MFLFGALIALTIVLPFHEVDLTVPPAIGGETGQTCFEYYMQTQKCVYPTPATDCPSFLATTKMDMIFPATDDAEPVKEYGPVKENSTVMSMICGSFNPTADLGVCLFSGLDTTGSNPQAAGWVSRLVSHPGSPPVVATIMDGCTFNAQTNAAGCGEMFVTPALFMALNPNAQELSTHVLTGVSWKL
protein11315	286	Contig115641	PHNK01114285	22	0.399	FGNQYQLWGCLFSSSTLISLAKEAFSSAQINLCPILNYDSTIFFNIPHVIFEGSFQISQSTQDWKADQLIQGIKKVLKTHQLQAINFMIDNEKMLKEKLDIMPTDLQSLIFFLRIKKWQEDWLWKNFLFPGLQKEKANSIKSINHLMKVISLRRTKDADFVSSKKYQRGILVQLADPWRSKLDVLQEGFTEQYRPPRSTDLPWDSSKFLRELMILRKFCNHPIYKNLDETPTFDFTWQHSAKICHLIGHLKNFLSGERGINFPKAVIFSNFADFLQMLVIL
protein11334	108	Contig39637	PHNK01039586	20	0.370	MSLIYGMALLTLMQNDASLQPEKFIDEDQYLLADSAYVNRKYILPDFQGAASEDGLNAKFKNHLAKSRVHIEHSIKILNGCFSSLRELRSPLRNRSKMEAVINWIL
protein11338	330	Contig106738	PHNK01105563	30	0.504	MKHLSTRQLLHSTMNAITLLLVLYYKSDSDLEDALAYFCFLSKKCYLISRGPNLYHDPQYDLRSILNIPQLNFTQLFRTSPNSFFKLYQLISEHPIFHNNSHNKQRNPAIQLAVALCCFGSNGNGAAVRHLDNLFNIGYGTVILYTKRCMIAILSLNGCPGSCHDSSVFQRMRISQTPDSYFDKSQYLLADSAYASGKYIIPAFCGATLENDPKTKFNYHLAQSRVWIEHAIGILKGQFSSLWELRIQFQKKLEIKTANHWIMTCVILHNILADLKDEWNDLYEEEDPEPAPALPSLESQNIQSTGIQSIIMPITLQHFTSQHF
protein11355	150	Contig80435	PHNK01079804	30	0.464	MKHLSTRKLLHSTMNAITFLLVLYYKSDSDLEDALAYMCFLSKKCYIITRGPNLYHDPRYDLASILNIPHLNFTQLFRTSPNSFFKLYQLISEHPIFHNNSHNKQRNPAIQLAVALCRFGSNGNGAAVRRLDNLFNIGYGTWLPWIMS
protein11365	377	Contig16315	PHNK01016313	22	0.440	MYLVKLCWIFSSEWYVEICCGTPILIFLSSFETTSGGGSQGGMAQYVSLEDGYKHNMVGVDNGVVYCACIFLTSHIVVVGVDKTQYSGGMRNSIRVSSKDVYNAGTLMIIDVKHMPASCGSWPAIWTVAKDGSWPESGEIDIVEGVNQFSQNAMSQFLPSFFFFSCNNFKDTQMFSSSSGVHTRDGFSMIDTGFAGKFMMNSDQKNDCSAYATNDQGCGLRDPSTNSFGPNFNANGGGVYALEWTESTINFFENGKVPGDISSGYPSRNHNWGLPRAKFQGTNGQSTADFFKDHVLVINTNLCGKWPEGAWGSDSSYAGQSKSCAAITNHDSCQSRSSPLTYLRFYRFISNAGDKLGEAYWAIKSIKVYH
protein11387	125	Contig100916	PHNK01099865	18	0.686	MIMILNLLLHYVSLAQMEMMLLSCHDSSVFHRMRTSQNPDSYFDKSQYLLSDSEYASGKYIIPALHGTTIENDPKTTFNYNLAQSRVLIENSFGILKGRFSSLRELRIYFQEKWKLKLQNIG
protein11410	106	Contig3666	PHNK01003666	16	0.547	MAVVCLLALAIYTHTTNESAAIAKLFLYEPGLIAQLSQLVEPDVTPNHISGEIQAGAFFSLEGISRYCGKIAELASTIVVSVRHGVLMQVVRKMVKELERENAH
protein11467	214	Contig10903	PHNK01010903	25	0.717	MLTRILFTKRYFISILFLVNFSQACDNTTTKKPNPDQHSHQPNRTTDSNKNCFPYVHRFNSGSIGSGKQWNQLSKRKDSYTSNSEGVRLVLNPPAGLVKISEDGLTNDKVGDGSTINSTYSFLYGKVTYTLAAPSVPGTVTGAVLFGTHSADEVDVEILGGDPSHWQTNVFRPAPNETTPLYGAFGGVHNYSQGLVDELHSYTIDWSPDK
protein11468	43	Contig10903	PHNK01010903	19	0.517	MFIPTRNVLLMFTNLIMGLLEVEKSGSLFRPEKTHLPLAMMV
protein11489	261	Contig79820	PHNK01079196	29	0.471	MHLSYRQLLHSTMNAITLLLVLYYKSDSDLEDALAYLCFLSKKCYLIARGPNLHHDPRYDLHSILNIPQLNFTQLFQTSPDSFFKLSQIISNHPIFCKNLHNKKCNPVFQLAVTLCLFHSNRNGAAFIAFHSGFPGSCHDSFVFQRMNISQNPDQYFDKSQYLLAESAYASGKYIIPAFCGATLENDPKTTFNYHLAQSRSPGTQNPISKKMEIKTANCWIMTCIILHNILADLKDQWNDLYEDKDPEPCYSSPLP
protein11505	161	Contig8649	PHNK01008649	30	0.485	MDFLYHSSKPLNILVIIVELLVVFQSIENQHVYHTSHVLSPIPSLSSSNLTKSAQLSSCSIVNTSLESWKALQIDEFIRHYPNGYSLSFSEFTLDLGASNFICGIGENCLAGQQCNPFDGKKWLVLFAIQEWNSYVNSLYSSMISAITLVRSKYKFNV
protein11518	286	Contig1052	PHNK01001053	26	0.883	MFSLNGKSCSLCIFFILICLSTIRAQTSSPDLTPYSVPRSSSHSKKHHHHSRKSHRKKHPKSYTDTSLPSNNCGSPKPTKETTVNSGPNGSQDWLNCGIQSEGWSPAHVNISSIRVISLGEEPAKSTFKPCQPYFPLFEKYGSQFNVPPIFLASFAMQESSCNPDEMGDNGGAYGLMQITQDKCGAAPNGNCKDPDFNVRSGAKVFADGLTSSNGNVLMAIGAYNGWYEKMTYSQAIAARNNGCCECQQNLDYLQQFLNGWVLGLSPYDRKIGAIQNLAGC
protein11587	118	Contig61877	PHNK01061598	22	0.404	FGNQYQLWGCLFSSSTLISLAKEAFSSAQIDLCPILNYDSTIFFNIPHVIFEGSFQISQSTQDWKADQLIRGIKTVLKTHQLQAINFMIDNERMLKEKLDIIGLKQYLTWNPNTDYA
protein11626	141	Contig59102	PHNK01058876	17	0.379	MNAIALLLVLYYKTDSDLEDALAYMSFLSKKHYINLRGPNLHHDPRYDLHSILNIPQLNIHSNCFKILPILSSNFINSSPNILSFITILKINSVILLFNLMLHYVALAQMEIVLLGCPGSCHDSSIFQRMRISQSPDS
protein11738	285	Contig755	PHNK01000756	21	0.605	MFHFHIRLLWGLLETFPVPSAPIQAKQVEFMQRFSSVEQIKNTTADNKAPEIFGQEEIEVLKGMKEGHTKLGSGMVHASKFFLFYICRTLAKLGLHHWAPDFSKQNDSLYNEACQISAIMTFHQSVIGNPYKFMNVNKTYINNLGIMQQAYNHYVHYVMAKCYESECKSQGKFEEYEERKVIKKALQRIADFNEGKHQQRYVCVQEKNPKETSFLKAPKQLPLYFYDSSWYNSLLPAQKINLATSDKIAFLPDPLKPIRGKQHLDEKLNDKKFKKNTGSR
protein11750	129	Contig78241	PHNK01077645	14	0.488	SALLLTLVPLLHCLSLKNRYLLIELIFHPSKPDDQISHDIPSIDERTFLEVVKESLQVNFGDYGAGKASGSLNVKYYSPVTHLLIIRCARDNLPIVRAAITFIRQIKGKDLICHVLHVSGEKYSSL
protein11809	140	Contig13650	PHNK01013649	18	0.660	MPSFLFLLSRFFLRVDGVVFRLFDVRVFVEFSDRPVVIRQTKGREMPYEEVKKKLPNENGCDLTPLTDPNWVAQALKMLDNENDQTLLETSEVQTASPMEEKWSQGWTTIEKAELMVNDDCDKGNEFSDRKFDHTNK
protein11811	275	Contig37898	PHNK01037854	19	0.886	MIFSALLLLTASIGRVRAGAVPTGPSPGQSYNADSDCLVTWNPDTTGTWKNMKIELMTGSNTAMEHLATVADNMDGTGSTNNLTWKCPRVDPYSAIYFYQFSNNNALQTWTTRFTIASPTGETVPPPKSTQPDGKAIPWGTGKLLGGSGNSSLSSSNTTATTTSQPLTNSTVATDSKGNGTTTSVGATTQATNKSATAPDSTSSLDTPVTAKNTSFGKGNGPIATGASTANTTSTSNTTNTGDSSSMSSLLTQRSTAAFITLISILFFLL
protein11833	115	Contig45453	PHNK01045375	17	0.364	MKHLAAYLLLVQGGNSSPSADDIKAVLGSVGIDAQEEQLKKLIEELSGKSLSDLIAEGSAKLASVPSGGAAAPAAAGGASSGAPAAGSAPAKEEEKAEAKEDSDEDMGFSLFD
protein11868	199	Contig5159	PHNK01005159	26	0.830	AAISLISLRLVLLILVFASIESANCSTPRTIQSKQCFSCANLGHLAADCPSLRLSSTPDGSNLHQKCYACGRCWSLFSFLFLLHSSLFFSSFNSIYPYPVGHISRSCPSLGPPTYNLQIPAFKPRLSPSTHVIQCYKCQGMNHYARDCMAFSPSFNHPYPSNPVHLKQKTCYRCQQIGHIARDCPETPSMEPAIS
protein11895	324	Contig13049	PHNK01013048	17	0.537	MATFPFILSPLKLVAASFQPSSKPVSKWPACWGHRGASAEYPENTLSSFKAAIQDGAEGIESDVHITLDDVVLMFHDPSLERTTDGSGFIRDQNYFGNIENIKTKQAPHQKIPTFDETMDILMVPENRHVVFNIDCKPDNDPQRLFTLIAKSIQRFSDWKDNLAPRLILGLWHPKFIEPATAILPDLKLAHIGSSILVARTYFWESCSVFSIAFATLMTSDGELFRRECEAQRKDVLVWTVNDRQEMIEATKWGVYAILTDKTADYLKLRKEMQEDWGKVSSENTIFFPYSSVQYYSLMRWARQTKEFRHLTSLAGPF
protein11905	208	Contig1622	PHNK01001622	28	0.545	AIHARELVEFPLTLILSFISLVPSTYPDPDLQGRPLSLPEYFAPYSNGDLALLALPISLNYKNILYHQPSHQATFSIQDELAQRERNGSMWAANRRRVTLFGNLRILNQQESLEAKSLYEKFHPDATKWDNDDGPHRSFWVRFGVNHAFYFGGFGDRAAIGWLDVKLYQKPLSKSAKQHALCHWRSGENHYCDQENLGNNTESE
protein11914	160	Contig13001	PHNK01013000	20	0.514	MILVFVLGLLIASNDPALKENSRPPNYSGPFILVIQRNKMKGFASFMNVVFLISTLAACSTDLYAASRSLYGLALWGNAPRILKVTNSRGLPYCALIVSAMMGMISFVKEGAYTDVTHALAGTFTPLFSYIAHFLKQSLNLELIVLAKTMDLQKAQP
protein11932	142	Contig26727	PHNK01026710	29	0.528	MLKFTLNFIRRVISSIVVALNLTTLAEQGPLPTTKILRERKFQSAHISPFAGNLQTQVVTCNGQDVKVRQILNDAVIPLTGLGDCPKDDQGFCPFDTYVKGLKKRVKQVDYQYACHGHYEYKPPMEGGGIVNGQPPSYH
protein11935	40	Contig754	PHNK01000755	20	0.487	MKVTLDWITACLILHNLLSNLKDGWNELYKVKFLIHLHQ
protein11946	205	Contig60235	PHNK01059985	23	0.408	MKHLSTRKLIHSAMNAITLVLATDSDSYSGLKDTLAYMSFLSKKCYVIPRGPNLYHDPRYYLCSILNIPHLNFTQLFGTCPDYFFKISQLISNHPIFHNNSHIKQRLDNLFAIGYGTIILYTKCCMIAKLSLKSETLAWPAPLQQLESSQVMQAEGFPGCVGFFDGTTITLSQKPAHDGNHYFDFKKCFFKMFSNFTSFIN
protein11951	115	Contig2480	PHNK01002480	24	0.441	PSIQPMNLGASLFLVYTIGQVDVFINTEAVTSNNTVYDLPPNYDDLANGNNSVNNECLIKPLNPHLWMSLGLNEYLRGYPGGDQLNLVHKNRHFTIMIVESIKTVTQDKLSLK
protein11994	129	Contig54956	PHNK01054807	22	0.752	MGSGTVHVSEFFLLYVCTTLAKLVLCCWAPDFNEQPDSLHNEVCRISAIMTFHQSVIGNAYKFMNANQMYTNNLGIIFEESEERKVIQKAHQRLRDARFRFAVNNKFPQCYQDIISCLQAHSDDKY
protein12299	108	Contig53709	PHNK01053577	24	0.506	MKIFAYGTLYLPLTLFLLFDSKSTVIKHLKKNHELATKVGIPNWCDSEWEDISHEYLLFSNVIITHSGFHNKIHTDTKDTNFLTFGIFSYIKPITGQPIPSPAKIK
protein12340	78	Contig12732	PHNK01012731	16	0.776	MTLLFKLLLHYVALAQMEMVLLGFSGSCHDSSVFQRMRISQTPDSYFDKSQYLLADSEYASGKMSGVIFMKKRILN
protein12405	136	Contig609	PHNK01000610	22	0.376	FGNQYQLWGCLFSSSTLISLAKEEFSSAQIDLCPILNYNSTIFFNIPHSTQDWKADQLSQGIKTVLKTHQLQAINFMIENEKMLKEKLDIMDQTIFDLESQHQLFLTETPLQSRPTDLQSLIFILRIEKWQID
protein12429	75	Contig2454	PHNK01002454	34	0.417	LSLIILSSILIPITNRVILPFNLLLHYVDLVQMEMVLLFHKILNNTLTNLSTSFQNQHMQVEDALYLLFKAQI
protein12439	623	Contig74606	PHNK01074083	35	0.752	MAQSLMGRRLNGSLAGMKLLLLLMVLLHVDMVKQVRFFIADREVEKEVIAMQAFKDKDWVKLSKAMVDRWGVRFTMMDLNKIVGDWQAKGGVSSMADFKKLCVQFDEVVEYLILVDELVHENQAKDLFWSACSRDIRMDVLKDLSRKDLMKELPNGEQKLPALEVIKDNIQAHLKLLALDKYQESCTQYVSKVSEVLAENNDIMVKAQEAKKAQMGLPAAKVEGNVDNKMVDHLADLTKQLKIFVQETQKANKAPIASSSTSTSYQSRGYERRNYNGNNNGNRFPGNGRNGGNGGNGYRGGYDEPKVCSYCNRRGHRATVCFALDKDMDAGRVLFDGKVYKFPDGSFIKPSDGQSPSDLVRRSLTAERRARFEEVTDEDVNAKSGKNGNGNGGKADKGK…
protein12522	119	Contig61877	PHNK01061598	22	0.404	FGNQYQLWGCLFSSSTLISLAKEAFSSAQIDLCPILNYDSTIFFNIPHVIFEGSFQISQSTQDWKADQLIRGIKTVLKTHQLQAINFMIDNERMLKEKLDIIGLKQYLTWNPNTDYA
protein12528	193	Contig32138	PHNK01032106	16	0.840	MILLFNLLLHYVTWAQIEMVLLGCLGSCHESSVLQIMRISQTPDSYFDKSQYLLADSAYASGKYIIPAFCVASLENDPKTKFNYHLAQSRIWIEHAIGILKGQLPSLQELRIQFQKKLEIKTANHWIMTCVILQNILADLKDEWNDLYKEEDPEPVPALPSLESQNTHSTRICSVIIPITLHHFGTQPF
protein12530	30	Contig22429	PHNK01022422	19	0.438	MLMFSVLMLSLLIKDSTTMFMKINMIRIV
protein12699	80	Contig25422	PHNK01025408	22	0.441	MWRRITYYVAFPSIIVAYLHAENLAEEHRKHIEHIKAENGGELPERIQYDYLNRRVKSFPWGNKTLFYNPEVNLPPPE
protein12716	23	Contig1974	PHNK01001974	18	0.563	MILSFNFLLHYVTLVQMEMVLL
protein12731	303	Contig1336	PHNK01001336	33	0.374	MPSPQGPSRLAPTNSLILTSLSTLCFHHSLQSTLKSHFSHFGHLYTWAPLPSLARILIVYGPSDPLSIESNHDPQLIQIENGPAIQAAVVAKKAMDRFVIDVPANELGDAIGPYRMVLKVHFGPMTSTSPTPSYLCPPPLEKNFLISPPGSPPVGWNQIKEDPPNQDTLADDLARRLRFLSVGDETEDEDLNNSMYDHQHQHLSFHPDTQSFRDQDKDKIVILAHPPGSILPSLTVQPSINEPNSSSSYTARTTTTNRSSSSFGCITNVKATVESLRGRDGLYCQTTKITPTPRPDFF
protein12750	181	Contig29241	PHNK01029217	47	0.478	WNLFTIQLPLILQVYWLSTDPEKQSLLRNFFHLVTLVTIALKRRMADELIAKYRHHLHEYLKSSLILFDDVKLAPNHHMAIHLTDSLENFGPVRAWWSFPMEQLMGSILKSCHNNHIDILHINTSKITGKMENTFLTTFCRVGNLKSLMMDPEKIPDSLEPFLLTLLKAHSKETTCEI
protein12754	151	Contig67628	PHNK01067238	30	0.468	MKHLSTRKLLHSTMNAITFLLVLYYKSDSDLEDALAYMCFLSKKCYIITRGPNLYHDPGYDLASILNILHLNFTQLFRTSHNSFFKLYQLISDHPIFHNNSHNKQRNPAIQLAVALCHFGSNGNGAAVRCLDNLFNIGYGTWLPWLMS
protein12823	434	Contig22556	PHNK01022549	21	0.429	MLICSLPLVCQLSLFHLKTPITIKSTYDSNVDSFPVFSMYIFRLQQMAQFFFLWQITISSSLSQSEFTEILLQPLIKLYACPDRAVDSPFWSSCLSMLTNWKNLQKIWPNLVTGFTDTVPVILYSVLLIVPKLSECLLNNDLICHLEKTQVNTDPEIRTNTCILLDHLSKSLTPSTCHKVLIPAFTCSLRDSFPPARMAGLMALIAKVEYYEPEDLARKVIPGMAICLVDKEKLAFKALDMFVECVRKAASEMPKTAINPLPSGALNKSSLASKTSAPGLAICAAGAAGALASWAFSSVSRKLTSRLESSSSSLSITTTLGSSTPQVLTSQTESSPLTEKMPPSLQMAAKETISSWGGNLMDVEADADDWSTFETGPPVSDPSFIPLPSTIKLHLQSAE…
protein12838	348	Contig470	PHNK01000471	21	0.437	MVFGMILTPVLSVFSEIGSSLNGIVKKSLTSTISLAFDAYQALLNLSEKFDEQVRSKSRRKENELLDLLHSFKGSCLRSLPEFIQDTKAWGEKVPQGIESTSSSISERTIQVIDFMKTLCDYEKIVESFLRTLGDGNWLYASGNLKKPQANNENEDDESPLLPKYLSKVLRLPVSASSSVTNQSARAGVGAVFVINNLFYIRRQVLESAITDFIGTQGEDELNRRTRGARARYLDVWSPLIAALMDAGEEAGKGFGLGVVKSALPGQHSGAERREVKDRFGRFNEAFEEVLILHRVAKFEASDPEMKDRLRDEIERMIIPTYPSKYLKMSAEQVGDKIDELFT
protein12879	227	Contig93432	PHNK01092545	22	0.639	MGASVVNASEFFLLYICTTLAKLGLCCWAPNFSEQHDSLYNEACRISAIMTFQQAIVGNDYKFMNVNQTYINNLGIMQQAYNHYVYYVMAQQYEGEQKLQGKFLQDEEKKLIQKACQRLRDARFKFAVNNNFPVRYKEIISCLLDHSDDKYNAKRDAYIVKDLPFRSESADTFFRCLDAEMKLSGQNEGKRQQRHTRIRVKNPRTTAFSKAPKNLPLDFYNEN
protein12905	151	Contig62723	PHNK01062430	30	0.393	MKHLSTRKLLHSTMNAITFILVLYYKSDSDLEDALDYMCFLSKKRYIITRGPNLYHDPQYDLASILNIPHLNFTQLFRTSPNSFFKLYQLISDHPIFHNNSHNKQHNPAIQLAVALCRFGSNGNCAALRRLDNLFNIGYGTWLPWIMS
protein12919	169	Contig111074	PHNK01109819	26	0.680	MKIFTYGILYLPLTLFLLFNSKSSAIKHLKKNHELATKVGIPNWCDSEWEDITQKYLLFSNFIITHSGFHNRIHINRNDTNFHTFGIFSYINPVTGQPIPSPAKIKGHGLYFPYHQCIIDFGLGNGIIKPFGILLRIIIKRPKLLLVWNPVTISHISVAYFKSVIS
protein12938	159	Contig5996	PHNK01005996	30	0.405	MKQLSTSKLLHSTMNAITFLLVLYYKSDSDLEDALAYLCFLSKKCYLIARGPNLYHDPQYDLHSILNIPQLKFTQLFKTSHNSFFKLYQLISEHPIFHNNSQKNSVILLFNLLLHYVPLAQMKMVLLIWDCDIIHQVLYDFHPFLKSQTLAWLNPQQ
protein13002	553	Contig10074	PHNK01099694	23	0.738	MRYFSCWLLLAPFSFSIKNALAGSSPVEFDTEQQLQSTAQLTLNDWNSVQSAFTIETPPQTSPSPENPKIKNNSRPVSIIVSLLPSSVVNTVRTLNWTLHHPPEGSPHKNHHGSLPFHRLAWLVNHSQPTIDALSDPSASLTLFAPDDDALTPPKPSDHHHSSYDDKHVFWNALNFLQSSEGTKDTSNVDKRKIFQAIIDATLKYHIVPKKLDALEILDHSTLPTLLKFAAPPSRIRVGIKHKHVDLNFATQLDGSLTVLTKNGIIYTAKRHPLLPPLTPLSQLFLAPSLFSTLTSAAQKVDLDHVLLPKCNNKTHVVDDGQMDMVDERVQGILRSIASESEFKLRAFTVFAPTNKAFQKLGPSLNAFLFSPFGARVLRYVLSYHISPDVIWYTDHEDK…
